# Supplementary material for: Factors associated with patient-reported likelihood of using online self-care interventions: a Scleroderma Patient-centered Intervention Network (SPIN) cohort study
Source: PubMed Central journal article supplement — BMJ Open. 2019 Oct 14;9(10):e029542. doi: 10.1136/bmjopen-2019-029542 (PMC6797412; doi:10.1136/bmjopen-2019-029542), 2019-10-14
Supplement: bmjopen-2019-029542.draft_revisions.pdf [file bmjopen-2019-029542.draft_revisions.pdf]

# BMJ Open

BMJ Open is committed to open peer review. As part of this commitment we make the peer review history of every article we publish publicly available.

When an article is published we post the peer reviewers' comments and the authors' responses online. We also post the versions of the paper that were used during peer review. These are the versions that the peer review comments apply to.

The versions of the paper that follow are the versions that were submitted during the peer review process. They are not the versions of record or the final published versions. They should not be cited or distributed as the published version of this manuscript.

BMJ Open is an open access journal and the full, final, typeset and author-corrected version of record of the manuscript is available on our site with no access controls, subscription charges or pay-per-view fees (<http://bmjopen.bmj.com>).

If you have any questions on BMJ Open's open peer review process please email [editorial.bmjopen@bmj.com](mailto:editorial.bmjopen@bmj.com)

# BMJ Open

## Factors Associated with Patient-reported Likelihood of Using Online Self-care Interventions: A Scleroderma Patient-centered Intervention Network (SPIN) Cohort Study

|                               |                                                                                                                                                                                                                                                                                                                                                                                                                                                                                                                                                                                                                                                                                                                                                                                                                                                                                                     |
|-------------------------------|-----------------------------------------------------------------------------------------------------------------------------------------------------------------------------------------------------------------------------------------------------------------------------------------------------------------------------------------------------------------------------------------------------------------------------------------------------------------------------------------------------------------------------------------------------------------------------------------------------------------------------------------------------------------------------------------------------------------------------------------------------------------------------------------------------------------------------------------------------------------------------------------------------|
| Journal:                      | <i>BMJ Open</i>                                                                                                                                                                                                                                                                                                                                                                                                                                                                                                                                                                                                                                                                                                                                                                                                                                                                                     |
| Manuscript ID                 | bmjopen-2019-029542                                                                                                                                                                                                                                                                                                                                                                                                                                                                                                                                                                                                                                                                                                                                                                                                                                                                                 |
| Article Type:                 | Research                                                                                                                                                                                                                                                                                                                                                                                                                                                                                                                                                                                                                                                                                                                                                                                                                                                                                            |
| Date Submitted by the Author: | 30-Jan-2019                                                                                                                                                                                                                                                                                                                                                                                                                                                                                                                                                                                                                                                                                                                                                                                                                                                                                         |
| Complete List of Authors:     | <p>Kwakkenbos, Linda; Radboud University, Behavioural Science Institute, Clinical Psychology<br/> Cumin, Julie; Jewish General Hospital, Lady Davis Institute for Medical Research<br/> Carrier, Marie-Eve; Jewish General Hospital, Lady Davis Institute for Medical Research<br/> Bartlett, Susan; McGill University, Medicine<br/> Malcarne, Vanessa; San Diego State University, Psychology; San Diego State University/University of California, San Diego Joint Doctoral Program in Clinical Psychology<br/> Mouthon, Luc; Université Paris Descartes, Assistance Publique-Hôpitaux de Paris (AP-HP)<br/> Nielson, Warren; St. Joseph's Health Care, Beryl &amp; Richard Ivey Rheumatology Day Programs<br/> Rannou, F; University Paris Descartes<br/> Welling, Joep; NVLE Dutch patient organization for systemic autoimmune diseases<br/> Thombs, Brett; McGill University, Psychiatry</p> |
| Keywords:                     | RHEUMATOLOGY, Systemic sclerosis, Clinical trials < THERAPEUTICS, cohort multiple RCT                                                                                                                                                                                                                                                                                                                                                                                                                                                                                                                                                                                                                                                                                                                                                                                                               |
|                               |                                                                                                                                                                                                                                                                                                                                                                                                                                                                                                                                                                                                                                                                                                                                                                                                                                                                                                     |

SCHOLARONE™  
Manuscripts

## Factors Associated with Patient-reported Likelihood of Using Online Self-care

### Interventions: A Scleroderma Patient-centered Intervention Network (SPIN) Cohort Study

Linda Kwakkenbos, PhD<sup>1</sup>; Julie Cumin, BA<sup>2</sup>; Marie-Eve Carrier, MSc<sup>2</sup>; Susan J. Bartlett, PhD<sup>3,4,5</sup>; Vanessa L. Malcarne, PhD<sup>6,7</sup>; Luc Mouthon, MD, PhD<sup>8,9</sup>; Warren R. Nielson, PhD<sup>10,11</sup>; François Rannou, MD, PhD<sup>8</sup>; Joep Welling<sup>12</sup>; Brett D. Thombs, PhD<sup>2,3,13-16</sup>; and the SPIN Investigators<sup>17</sup>

<sup>1</sup>Behavioural Science Institute, Clinical Psychology, Radboud University, Nijmegen, the Netherlands

<sup>2</sup>Lady Davis Institute for Medical Research, Jewish General Hospital, Montréal, Québec, Canada

<sup>3</sup>Department of Medicine, McGill University, Montréal, Québec, Canada

<sup>4</sup>McGill University Health Center, Montréal, Québec, Canada

<sup>5</sup>Department of Medicine, Division of Rheumatology, Johns Hopkins University School of Medicine, Baltimore, Maryland, USA

<sup>6</sup>Department of Psychology, San Diego State University, San Diego, California, USA

<sup>7</sup>San Diego State University/ University of California, San Diego Joint Doctoral Program in Clinical Psychology, San Diego, California, USA

<sup>8</sup>Université Paris Descartes, Assistance Publique-Hôpitaux de Paris, Paris, France

<sup>9</sup>Service de Médecine Interne, Hôpital Cochin, Paris, France

<sup>10</sup>Beryl & Richard Ivey Rheumatology Day Programs, St Joseph's Health Care, London, Ontario, Canada

<sup>11</sup>Lawson Health Research Institute, London, Ontario, Canada

1  
2  
3 <sup>12</sup>NVLE Dutch patient organization for systemic autoimmune diseases, Utrecht, The Netherlands

4  
5 <sup>13</sup>Department of Psychiatry, McGill University, Montréal, Québec, Canada

6  
7 <sup>14</sup>Departments of Epidemiology, Biostatistics, and Occupational Health, McGill University,  
8  
9  
10 Montréal, Québec, Canada

11  
12 <sup>15</sup>Department of Educational and Counselling Psychology, McGill University, Montréal,  
13  
14  
15 Québec, Canada

16  
17 <sup>16</sup>Department of Psychology, McGill University, Montréal, Québec, Canada

18  
19 <sup>17</sup>SPIN Investigators: Murray Baron, McGill University, Montreal, Quebec, Canada; Daniel E.  
20  
21  
22 Furst, Division of Rheumatology, Geffen School of Medicine, University of California, Los  
23  
24  
25 Angeles, California, USA; Karen Gottesman, Scleroderma Foundation, Los Angeles, California,  
26  
27  
28 USA; Maureen D. Mayes, University of Texas McGovern School of Medicine, Houston, Texas,  
29  
30  
31 USA; Robert Riggs, Scleroderma Foundation, Danvers, Massachusetts, USA; Maureen Sauve,  
32  
33  
34 Scleroderma Society of Ontario, Hamilton, Ontario; Fredrick Wigley, Johns Hopkins University  
35  
36  
37 School of Medicine, Baltimore, Maryland, USA; Shervin Assassi, University of Texas  
38  
39  
40 McGovern School of Medicine, Houston, Texas, USA; Isabelle Boutron, Université Paris  
41  
42  
43 Descartes, and Assistance Publique-Hôpitaux de Paris, Paris, France; Angela Costa Maia,  
44  
45  
46 University of Minho, Braga, Portugal; Lindsay Cronin, Scleroderma Foundation, Western  
47  
48  
49 Pennsylvania Chapter, Pittsburgh, Pennsylvania, USA; Ghassan El-Baalbaki, Université du  
50  
51  
52 Québec à Montréal, Montreal, Quebec, Canada; Carolyn Ells, McGill University, Montreal,  
53  
54  
55 Quebec, Canada; Stephen Elrod, Scleroderma Foundation, Southern California Chapter, Los  
56  
57  
58  
59  
60

1  
2  
3 Angeles, California, USA; Cornelia van den Ende, Sint Maartenskliniek, Nijmegen, The  
4  
5  
6 Netherlands; Kim Fligelstone, Scleroderma & Raynaud's UK, London, UK; Catherine Fortune,  
7  
8  
9 Scleroderma Society of Ontario, Hamilton, Ontario, Canada; Tracy Frech, University of Utah,  
10  
11  
12 Salt Lake City, Utah, USA; Amy Gietzen, Scleroderma Foundation, Tri-State Chapter,  
13  
14  
15 Binghamton, New York, USA; Dominique Godard, Association des Sclérodermiques de France,  
16  
17  
18 Sorel-Moussel, France; Geneviève Guillot, Sclérodermie Québec, Montreal, Quebec, Canada;  
19  
20  
21 Daphna Harel, New York University, New York, New York, USA; Shirley Haslam, Scleroderma  
22  
23  
24 Society of Ontario, Hamilton, Ontario, Canada; Monique Hinchcliff, Yale School of Medicine,  
25  
26  
27 New Haven, Connecticut, USA; Marie Hudson, McGill University, Montreal, Quebec, Canada;  
28  
29  
30 Ann Impens, Midwestern University, Downers Grove, Illinois, USA; Yeona Jang, McGill  
31  
32  
33 University, Montreal, Quebec, Canada; Sindhu R. Johnson, Toronto Scleroderma Program,  
34  
35  
36 Mount Sinai Hospital, Toronto Western Hospital, and University of Toronto, Toronto, Ontario,  
37  
38  
39 Canada; Ann Tyrell Kennedy, Federation of European Scleroderma Associations, Dublin,  
40  
41  
42 Ireland; Annett Körner, McGill University, Montreal, Quebec, Canada; Maggie Larche,  
43  
44  
45 McMaster University, Hamilton, Ontario, Canada; Catarina Leite, University of Minho, Braga,  
46  
47  
48 Portugal; Carlo Marra, Memorial University, St. John's, Newfoundland, Canada; Christelle  
49  
50  
51 Nguyen, Université Paris Descartes, and Assistance Publique - Hôpitaux de Paris, Paris, France;  
52  
53  
54 Karen Nielsen, Scleroderma Society of Ontario, Hamilton, Ontario, Canada; Janet Pope,  
55  
56  
57 University of Western Ontario, London, Ontario, Canada; Alexandra Portales, Asociación  
58  
59  
60

1  
2  
3 Española de Esclerodermia, Madrid, Spain; Michelle Richard, Scleroderma Society of Nova  
4  
5  
6 Scotia, Halifax, Nova Scotia, Canada; Tatiana Sofia Rodriguez Reyna, Instituto Nacional de  
7  
8  
9 Ciencias Médicas y Nutrición Salvador Zubirán, Mexico City, Mexico; Ken Rozee, Scleroderma  
10  
11  
12 Society of Nova Scotia, Halifax, Nova Scotia, Canada; Anne A. Schouffoer, Leiden University  
13  
14  
15 Medical Center, Leiden, The Netherlands; Russell J. Steele, Jewish General Hospital and McGill  
16  
17  
18 University, Montreal, Quebec, Canada; Nancy Stephens, Scleroderma Foundation, Michigan  
19  
20  
21 Chapter, Southfield, Michigan, USA; Maria E. Suarez-Almazor, University of Texas MD  
22  
23  
24 Anderson Cancer Center, Houston, Texas, USA; Durhane Wong-Rieger, Canadian Organization  
25  
26  
27 for Rare Disorders, Toronto, Ontario, Canada; Christian Agard, Centre Hospitalier Universitaire  
28  
29  
30 - Hôtel-Dieu de Nantes, Nantes, France; Alexandra Albert, Université Laval, Quebec, Quebec,  
31  
32  
33 Canada; Marc André, Centre Hospitalier Universitaire Gabriel-Montpied, Clermont-Ferrand,  
34  
35  
36 France; Guylaine Arsenault, Université de Sherbrooke, Sherbrooke, Quebec, Canada; Ilham  
37  
38  
39 Benzidia, Assistance Publique - Hôpitaux de Paris, Hôpital St-Louis, Paris, France; Sabine  
40  
41  
42 Berthier, Centre Hospitalier Universitaire Dijon Bourgogne, Dijon, France; Lyne Bissonnette,  
43  
44  
45 Université de Sherbrooke, Sherbrooke, Quebec, Canada; Gilles Boire, Université de Sherbrooke,  
46  
47  
48 Sherbrooke, Quebec, Canada; Alessandra Bruns, Université de Sherbrooke, Sherbrooke, Quebec,  
49  
50  
51 Canada; Patricia Carreira, Servicio de Reumatología del Hospital 12 de Octubre, Madrid, Spain;  
52  
53  
54 Marion Casadevall, Assistance Publique - Hôpitaux de Paris, Hôpital Cochin, Paris, France;  
55  
56  
57 Benjamin Chaigne, Assistance Publique - Hôpitaux de Paris, Hôpital Cochin, Paris, France;  
58  
59  
60

1  
2  
3 Lorinda Chung, Stanford University, Stanford, California, USA; Pascal Cohen, Assistance  
4  
5  
6 Publique - Hôpitaux de Paris, Hôpital Cochin, Paris, France; Chase Correia, Northwestern  
7  
8  
9 University, Chicago, Illinois, USA; Pierre Dagenais, Université de Sherbrooke, Sherbrooke,  
10  
11  
12 Quebec, Canada; Christopher Denton, Royal Free London Hospital, London, UK; Robyn  
13  
14  
15 Domsic, University of Pittsburgh, Pittsburgh, Pennsylvania, USA; Sandrine Dubois, Centre  
16  
17  
18 Hospitalier Régional Universitaire de Lille, Hôpital Claude Huriez, Lille, France; James V.  
19  
20  
21 Dunne, St. Paul's Hospital and University of British Columbia, Vancouver, British Columbia,  
22  
23  
24 Canada; Bertrand Dunogue, Assistance Publique - Hôpitaux de Paris, Hôpital Cochin, Paris,  
25  
26  
27 France; Alexia Esquinca, Instituto Nacional de Ciencias Médicas y Nutrición Salvador Zubirán,  
28  
29  
30 Mexico City, Mexico; Regina Fare, Servicio de Reumatología del Hospital 12 de Octubre,  
31  
32  
33 Madrid, Spain; Dominique Farge-Bancel, Assistance Publique - Hôpitaux de Paris, Hôpital St-  
34  
35  
36 Louis, Paris, France; Paul R. Fortin, CHU de Québec - Université Laval, Québec, Québec,  
37  
38  
39 Canada; Anna Gill, Royal Free London Hospital, London, UK; Jessica Gordon, Hospital for  
40  
41  
42 Special Surgery, New York City, New York, USA; Brigitte Granel-Rey, Aix Marseille  
43  
44  
45 Université, and Assistance Publique - Hôpitaux de Marseille, Hôpital Nord, Marseille, France;  
46  
47  
48 Claire Grange, Centre Hospitalier Lyon Sud, Lyon, France; Genevieve Gyger, Jewish General  
49  
50  
51 Hospital and McGill University, Montreal, Québec, Canada; Eric Hachulla, Centre Hospitalier  
52  
53  
54 Régional Universitaire de Lille, Hôpital Claude Huriez, Lille, France; Pierre-Yves Hatron,  
55  
56  
57 Centre Hospitalier Régional Universitaire de Lille, Hôpital Claude Huriez, Lille, France; Ariane  
58  
59  
60

1  
2  
3 L Herrick, University of Manchester, Salford Royal NHS Foundation Trust, Manchester, UK;  
4  
5  
6 Adrian Hij, Assistance Publique - Hôpitaux de Paris, Hôpital St-Louis, Paris, France; Monique  
7  
8  
9 Hinchcliff, Northwestern University, Chicago, Illinois, USA; Alena Ikic, Université Laval,  
10  
11  
12 Quebec, Quebec, Canada; Niall Jones, University of Alberta, Edmonton, Alberta, Canada; Artur  
13  
14  
15 Jose de B. Fernandes, Université de Sherbrooke, Sherbrooke, Quebec, Canada; Suzanne Kafaja,  
16  
17  
18 University of California, Los Angeles, California, USA; Nader Khalidi, McMaster University,  
19  
20  
21 Hamilton, Ontario, Canada; Marc Lambert, Centre Hospitalier Régional Universitaire de Lille,  
22  
23  
24 Hôpital Claude Huriez, Lille, France; David Launay, Centre Hospitalier Régional Universitaire  
25  
26  
27 de Lille, Hôpital Claude Huriez, Lille, France; Patrick Liang, Université de Sherbrooke,  
28  
29  
30 Sherbrooke, Quebec, Canada; Hélène Maillard, Centre Hospitalier Régional Universitaire de  
31  
32  
33 Lille, Hôpital Claude Huriez, Lille, France; Nancy Maltez, University of Ottawa, Ottawa,  
34  
35  
36 Ontario, Canada; Joanne Manning, Salford Royal NHS Foundation Trust, Salford, UK; Isabelle  
37  
38  
39 Marie, CHU Rouen, Hôpital de Bois-Guillaume, Rouen, France; Maria Martin, Servicio de  
40  
41  
42 Reumatologia del Hospital 12 de Octubre, Madrid, Spain; Thierry Martin, Les Hôpitaux  
43  
44  
45 Universitaires de Strasbourg, Nouvel Hôpital Civil, Strasbourg, France; Ariel Masetto,  
46  
47  
48 Université de Sherbrooke, Sherbrooke, Quebec, Canada; François Maurier, Hôpitaux Privés de  
49  
50  
51 Metz, Hôpital Belle-Isle, Metz, France; Arsene Mekinian, Assistance Publique - Hôpitaux de  
52  
53  
54 Paris, Hôpital St-Antoine, Paris, France; Sheila Melchor, Servicio de Reumatologia del Hospital  
55  
56  
57 12 de Octubre, Madrid, Spain; Mandana Nikpour, St Vincent's Hospital and University of  
58  
59  
60



1  
2  
3 Melbourne, Melbourne, Victoria, Australia; Vincent Poindron, Les Hôpitaux Universitaires de  
4  
5  
6 Strasbourg, Nouvel Hôpital Civil, Strasbourg, France; Susanna Proudman, Royal Adelaide  
7  
8  
9 Hospital and University of Adelaide, Adelaide, South Australia, Australia; Alexis Régent,  
10  
11  
12 Assistance Publique - Hôpitaux de Paris, Hôpital Cochin, Paris, France; Sébastien Rivière,  
13  
14  
15 Assistance Publique - Hôpitaux de Paris, Hôpital St-Antoine, Paris, France; David Robinson,  
16  
17  
18 University of Manitoba, Winnipeg, Manitoba, Canada; Esther Rodriguez, Servicio de  
19  
20  
21 Reumatologia del Hospital 12 de Octubre, Madrid, Spain; Sophie Roux, Université de  
22  
23  
24 Sherbrooke, Sherbrooke, Quebec, Canada; Perrine Smets, Centre Hospitalier Universitaire  
25  
26  
27 Gabriel-Montpied, Clermont-Ferrand, France; Doug Smith, University of Ottawa, Ottawa,  
28  
29  
30 Ontario, Canada; Vincent Sobanski, Centre Hospitalier Régional Universitaire de Lille, Hôpital  
31  
32  
33 Claude Huriez, Lille, France; Robert Spiera, Hospital for Special Surgery, New York City, New  
34  
35  
36 York, USA; Virginia Steen, Georgetown University, Washington, DC, USA; Wendy Stevens, St  
37  
38  
39 Vincent's Hospital and University of Melbourne, Melbourne, Victoria, Australia; Evelyn Sutton,  
40  
41  
42 Dalhousie University, Halifax, Nova Scotia, Canada; Benjamin Terrier, Assistance Publique -  
43  
44  
45 Hôpitaux de Paris, Hôpital Cochin, Paris, France; Carter Thorne, Southlake Regional Health  
46  
47  
48 Centre, Newmarket, Ontario, Canada; John Varga, Northwestern University, Chicago, Illinois,  
49  
50  
51 USA; Pearce Wilcox, St. Paul's Hospital and University of British Columbia, Vancouver, British  
52  
53  
54 Columbia, Canada; Michelle Wilson, St Vincent's Hospital and University of Melbourne,  
55  
56  
57 Melbourne, Victoria, Australia;

1  
2  
3  
4  
5  
6 Kylene Anne Aguila, Jewish General Hospital, Montreal, Quebec, Canada; Mara Cañedo Ayala,  
7  
8  
9 Jewish General Hospital, Montreal, Quebec, Canada; Andrea Carboni-Jiménez, Jewish General  
10  
11  
12 Hospital, Montreal, Quebec, Canada; Claire Fedoruk, Jewish General Hospital, Montreal,  
13  
14  
15 Quebec, Canada; Shadi Gholizadeh, McGill University, Montreal, Quebec, Canada, and San  
16  
17  
18 Diego State University and University of California, San Diego, California, USA; Sami Harb,  
19  
20  
21 Jewish General Hospital, Montreal, Quebec, Canada; Lydia Tao, Jewish General Hospital,  
22  
23  
24 Montreal, Quebec, Canada; Kimberly Turner, Jewish General Hospital, Montreal, Quebec,  
25  
26  
27 Canada.

28  
29  
30  
31 **Address for Correspondence:** Brett D. Thombs, PhD; Jewish General Hospital; 4333 Côte-  
32  
33  
34 Sainte-Catherine Road; Montréal, Québec H3T 1E4; Tel: (514) 340-8222 ext. 25112; Email:  
35  
36  
37 brett.thombs@mcgill.ca

38  
39  
40  
41 **Word Count:** 3,520  
42  
43  
44  
45  
46  
47  
48  
49  
50  
51  
52  
53  
54  
55  
56  
57  
58  
59  
60

## ABSTRACT

**Objectives:** The Scleroderma Patient-centered Intervention Network (SPIN) Cohort was constituted as a framework for conducting multiple trials of online self-care interventions for people living with systemic sclerosis (SSc, scleroderma), utilizing the cohort multiple randomised controlled trial design. In order to offer interventions to patients interested in using them, participants complete signalling items that query about the likelihood that patients would agree to participate in 9 different hypothetical online programs addressing problems common in SSc. It is not known, however, what factors influence patient-reported interest in participating in a particular online intervention and if intervention-specific signalling questions provide unique information or replicate broader characteristics, such as overall willingness to participate in interventions or self-efficacy. The objective of this study was to determine factors that explain responses to intervention-specific signalling items.

**Design:** Cross-sectional survey.

**Setting:** SPIN Cohort participants enrolled at 42 centres from Canada, the United States, the United Kingdom, France, Spain, and Mexico who completed study questionnaires from March 2014 through January 2018 were included.

**Participants:** In total, 1,060 participants had complete baseline data for all variables included in regression analyses and were included in the analyses, including 128 men (12%).

**Results:** For all individual signalling questions, controlling for other variables, the mean of the remaining signalling questions was the strongest predictor (standardized regression coefficient  $\beta$  from 0.61 (sleep) to 0.80 (self-management)). Smaller, but statistically significant, associations were found with the symptom associated with the respective signalling question and with general patient self-efficacy for 7 of 9 signalling questions.

1  
2  
3 **Conclusions:** The main factor associated with patients' interest in participating in a disease-  
4 specific online self-care intervention is their general interest in participating in online  
5 interventions. Factors that may influence this general interest should be explored and may be  
6 taken into consideration when inviting patients to try online interventions.  
7  
8  
9  
10  
11  
12  
13

14 **Keywords:** clinical trials; cmRCT; cohort multiple RCT; systemic sclerosis; scleroderma  
15  
16  
17  
18  
19  
20  
21  
22  
23  
24  
25  
26  
27  
28  
29  
30  
31  
32  
33  
34  
35  
36  
37  
38  
39  
40  
41  
42  
43  
44  
45  
46  
47  
48  
49  
50  
51  
52  
53  
54  
55  
56  
57  
58  
59  
60

### STRENGTHS AND LIMITATIONS OF THIS STUDY

- This is the first study to evaluate factors associated with patients indicating likelihood of using specific online interventions as part of signalling questions sometimes used in the cohort multiple randomised controlled trial design.
- A large, international sample of patients with SSc was analysed.
- Factors examined included sociodemographic variables, general likelihood of using online interventions, and symptoms or problems that would be addressed by the specific intervention.
- The SPIN Cohort constitutes a convenience sample of SSc patients receiving treatment at a SPIN recruiting centre, and patients at these centres may differ from those in other settings.
- SSc patients in the SPIN Cohort complete questionnaires online, which may limit the generalizability of findings.

## INTRODUCTION

Well-designed and conducted randomised controlled trials (RCTs) provide the best mechanism for evaluating the benefits and harms of healthcare interventions.[1,2] Large-scale RCTs, however, are complex and expensive to conduct. Concerns have been raised that many RCTs have difficulty recruiting and enrolling patients, consent procedures do not reflect how patients make decisions in real clinical practice, long-term outcomes are often not available, many trials have limited real-world generalizability, and the infrastructure needed for individual trials is prohibitively expensive.[3-11]

In response to these concerns, new approaches to RCTs have been proposed, including trial designs that utilize routinely collected health data or create data sources to facilitate patient recruitment and outcome assessment.[4,12-16] One example is the cohort multiple RCT (cmRCT) design.[4] In the cmRCT design, researchers set up an ongoing observational cohort that is designed from inception to serve as a framework for conducting trials. Participants who enrol in the cohort complete outcome measurements at regular intervals. When a trial is conducted using the cohort, a random selection of patients eligible for the trial is contacted and offered access to the intervention being tested. Patients who are eligible but not selected are not notified that the trial is occurring and therefore receive usual care. Outcomes for the two groups are compared post-trial using the cohort's routine data collection procedures. In most examples of cmRCTs, prior to enrolment in the cohort, patients are informed and consent to the possibility that they may be participants in trials but would not be notified about the trial if they are assigned to usual care.[17-22]

Participants sometimes enrol in trials in order to receive a new intervention that would not be available to them as part of their usual care. In conventional trial designs in which participants

1  
2  
3 consent to randomisation to a specific intervention or usual care, this may lead to withdrawal  
4 from the trial or disappointment bias reflected in patient-reported outcomes.[1,4] In order to  
5 reduce this possibility, in the cmRCT design, cohort participants are not notified about specific  
6 trials being planned or conducted, except when they are offered access to an intervention as part  
7 of a trial. A potential problem with this approach is that a substantial number of patients offered  
8 an intervention that is undergoing testing may not accept it, since they did not enrol in the cohort  
9 with any expectation that it would be offered to them. This would dilute intervention effects  
10 estimated on an intention-to-treat basis, potentially substantially if the rate of accepted offers is  
11 low, as the intervention arm then includes a large proportion of patients receiving care as  
12 usual.[23] A possible solution that has been suggested to reduce non-acceptance of intervention  
13 offers is to present cohort patients with a list of possible interventions as part of regular cohort  
14 data collection and ask if they would agree to use them if offered.[4] Using this as a criteria for  
15 eligibility to participate in the trial is thought to increase the likelihood of accepting an  
16 intervention offer without disclosing the actual intervention that will be offered.  
17  
18  
19  
20  
21  
22  
23  
24  
25  
26  
27  
28  
29  
30  
31  
32  
33  
34

35 Systemic sclerosis (SSc), also known as scleroderma, is a rare autoimmune connective  
36 tissue disease characterized by vascular injury, immune dysfunction and an abnormal fibrotic  
37 process that can affect multiple organ systems including the skin, lungs, gastrointestinal tract and  
38 cardiovascular system.[24,25] SSc is notable for the range of problems faced by people living  
39 with the disease, including limitations in physical mobility and hand function, pain, fatigue, sleep  
40 disturbance, depression, sexual dysfunction, and body image distress from disfiguring changes in  
41 appearance.[17,26-28] The Scleroderma Patient-centered Intervention Network (SPIN) was  
42 formed to develop, test, and disseminate interventions to improve the health and quality of life of  
43 patients with SSc, and to serve as a model for doing this in other rare diseases. To do this, SPIN  
44  
45  
46  
47  
48  
49  
50  
51  
52  
53  
54  
55  
56  
57  
58  
59  
60

1  
2  
3 utilizes the cmRCT design and maintains a large international cohort used to collect information  
4 about problems important to patients and as a framework for RCTs of internet-based  
5 rehabilitation, education, self-management, and psychological interventions.[17]  
6  
7

8  
9  
10 As part of routine data collection via the SPIN Cohort, SPIN administers a series of  
11 signalling items that query about patients' self-reported likelihood of using 9 different online  
12 programs that would address problems common in SSc, including fatigue, hand function and  
13 mobility, sleep difficulty, emotions and stress, concerns about body image and appearance, pain,  
14 low self-efficacy for managing different problems common in scleroderma, nutrition and diet,  
15 and difficulty exercising. It is not clear, however, what factors are associated with patient-  
16 reported likelihood of using interventions and whether responses reflect a general willingness to  
17 use online interventions versus the desire to address specific problems or symptoms. The  
18 objective of this study was to identify characteristics of SPIN Cohort participants associated with  
19 a greater reported likelihood that they would agree to use an online intervention if it were offered  
20 through SPIN, including sociodemographic characteristics, disease characteristics, a general  
21 willingness to use online interventions, and symptoms or problems that would be presumed to be  
22 addressed by each specific intervention.  
23  
24  
25  
26  
27  
28  
29  
30  
31  
32  
33  
34  
35  
36  
37  
38  
39

## 40 **PATIENTS AND METHODS**

### 41 **Patients and Procedure**

42  
43  
44 The study sample consisted of participants enrolled in the SPIN Cohort [17] who  
45 completed study questionnaires from March 2014 through January 2018. Patients were enrolled  
46 at 42 centres from Canada, the United States, the United Kingdom, France, Spain, and Mexico.  
47 To be eligible for the SPIN Cohort, participants must be classified as having SSc according to  
48 2013 ACR/EULAR criteria,[29] be  $\geq 18$  years of age, be fluent in English, French, or Spanish,  
49  
50  
51  
52  
53  
54  
55  
56  
57  
58  
59  
60



1  
2  
3 and be able to respond to questionnaires via the Internet. The SPIN sample is a convenience  
4 sample. Eligible participants are invited by attending physicians or supervised nurse coordinators  
5 from SPIN centres to participate, and written informed consent is obtained. The local SPIN  
6 investigator provides medical data, which triggers an email invitation to participants with  
7 instructions for activating their SPIN account and completing SPIN Cohort measures online.  
8 Participants complete outcome measures upon enrolment and subsequently every 3 months.  
9  
10 Participants with limited or diffuse SSc who completed all study variables at baseline were  
11 included in the present study. The SPIN Cohort study was approved by the Research Ethics  
12 Committee of the Jewish General Hospital, Montréal, Canada and by the research ethics  
13 committees of each participating centre.  
14  
15  
16  
17  
18  
19  
20  
21  
22  
23  
24  
25

## 26 **Measures**

27  
28 *Sociodemographic and Medical Data.* Patients provided demographic data, including age, sex  
29 and years of education. SPIN recruiting physicians provided medical data, including time since  
30 first non-Raynaud's phenomenon symptoms, onset of Raynaud's phenomenon, and SSc  
31 diagnosis; SSc subtype (limited or diffuse cutaneous SSc);[30] and modified Rodnan Skin  
32 Score.[31]  
33  
34  
35  
36  
37  
38  
39

40 *Signalling Items.* Nine signalling items were developed specifically for use in the SPIN  
41 Cohort to assess the self-reported likelihood that Cohort participants would agree to use online  
42 programs designed to address one of nine problems related to living with scleroderma, including  
43 fatigue, hand function and mobility, sleep problems, emotions and stress, concerns about body  
44 image and appearance, pain, low self-efficacy for disease management, nutrition/diet, and  
45 exercise. Each item (*"Please indicate how likely you would be to participate in an online*  
46  
47  
48  
49  
50  
51  
52  
53  
54  
55  
56  
57  
58  
59  
60

1  
2  
3 *program that addresses [...]"*) is rated on a numerical scale ranging from 0 (*not likely at all*) to  
4  
5 10 (*very likely*).

6  
7 *Self-Efficacy to Manage Chronic Disease Scale (SEMCD)*. The 6-item SEMCD Scale  
8  
9  
10 measures confidence in one's ability to manage fatigue, pain, emotional distress and other  
11  
12 symptoms as well as to reduce the need for medical care and reliance on medications.[32]  
13  
14 Respondents are asked to rate their current confidence in their ability to perform certain tasks  
15  
16 regularly. Each item is rated on a 10-point rating scale ranging from 1 (*not confident at all*) to 10  
17  
18 (*totally confident*). The score for the scale is the mean of all items, with higher scores reflecting  
19  
20 greater self-efficacy. The SEMCD scale has been validated in patients with SSc.[33]  
21  
22

23  
24 *Patient-Reported Outcomes Measurement Information System-29 (PROMIS-29v2)*. The  
25  
26 PROMIS-29 profile version 2.0 (PROMIS-29v2) [34] measures patient-reported health status  
27  
28 over the past 7 days, with 4 items for each of 7 domains (physical function, anxiety, depression,  
29  
30 fatigue, sleep disturbance, ability to participate in social roles and activities, pain interference)  
31  
32 plus a single pain intensity item. Items are scored on a 5-point scale (range 1-5), with different  
33  
34 response options for different domains. The single pain intensity item is measured on an 11-point  
35  
36 rating scale (0 = *no pain*, 11= *worst imaginable pain*). Higher scores represent more of the  
37  
38 domain being measured; that is, better physical function and ability to participate in social roles  
39  
40 and activities, but higher levels of anxiety, depression, fatigue, sleep disturbance, pain  
41  
42 interference, and pain intensity. Raw domain scores are obtained by summing item scores for  
43  
44 each domain, which are converted into T-scores standardized for the general US population  
45  
46 (mean=50, standard deviation [SD]=10). The PROMIS-29v2 has been validated in patients with  
47  
48 SSc.[35]  
49  
50  
51  
52

53  
54 *Cochin Hand Function scale (CHFS)*. The 18-item CHFS [36,37] measures the ability to  
55  
56  
57  
58  
59  
60

1  
2  
3 perform daily hand-related activities. Items are scored on a scale from 0 (*yes, without difficulty*)  
4 to 5 (*impossible*) and are grouped into five content categories: kitchen, dressing oneself, hygiene,  
5 the office, and other. Total scores range from 0 to 90, and higher scores indicate more hand  
6 disability. The CHFS has been validated in SSc.[37]  
7  
8  
9

10  
11  
12 *Social Appearance Anxiety Scale (SAAS)*. The SAAS is a 16-item measure examining  
13 fear of situations in which one's appearance will be evaluated.[38] Response options range from  
14 1 (*not at all*) to 5 (*extremely*). To calculate a total score, the first item is reverse coded and then  
15 all items are summed. Total scores range from 16 to 80, with higher scores indicating greater  
16 fear. The SAAS has been validated in SSc.[39]  
17  
18  
19

20  
21  
22 *Interference from gastrointestinal problems*. Interference with daily activities from  
23 gastrointestinal problems was assessed using an 11-point numerical rating scale (range 0-10),  
24 with higher scores indicating more limitations.  
25  
26  
27  
28  
29

30  
31 *Physical activity*. Physical activity was assessed using a single item "*Compared to other*  
32 *people your age, how would you rate your physical activity during the past year?*". Response  
33 options ranged from 1 (*physically inactive*) to 5 (*very active*).  
34  
35  
36  
37

## 38 **Statistical Analyses**

39  
40 Descriptive statistics were used to calculate the mean and standard deviation (SD) for  
41 each signalling item. To assess what factors were associated with self-reported likeliness of  
42 participating in an online program, multiple linear regression analyses were conducted for each  
43 of the 9 signalling questions separately. Independent variables included in the regression models  
44 were determined a-priori. For each regression analysis, the following independent variables were  
45 included: (a) demographic and disease characteristics including age, sex, disease duration (time  
46 since onset of first non-Raynaud symptom), modified Rodnan Skin Score, years of education; (b)  
47  
48  
49  
50  
51  
52  
53  
54  
55  
56  
57  
58  
59  
60

1  
2  
3 the mean score of the remaining signalling questions to reflect general likelihood of using online  
4 interventions; (c) self-efficacy to manage chronic disease; and (d) the symptom or problem  
5  
6 corresponding with the intervention in each signalling item. The intervention-specific symptoms  
7  
8 or problems were measured with the relevant PROMIS-29 domains for fatigue, sleep,  
9  
10 depression, and pain signalling items; physical activity for the exercise signalling item on  
11  
12 exercise, CHFS for the hand function signalling item, the SAAS for the body image signalling  
13  
14 item, and a single-item numerical rating scale item on intestinal problems for the nutrition and  
15  
16 diet signalling item. Standardized regression coefficients beta ( $\beta$ ) are reported, as well as the total  
17  
18 explained variance for each model ( $R^2$ ).  
19  
20  
21  
22

23  
24 In addition to the main regression model, based on our findings, we conducted  
25  
26 hierarchical regression models to quantify the amount of additional variance explained by the  
27  
28 mean score of the remaining signalling questions and the intervention-specific symptom or  
29  
30 problem variable. In these models, in step 1, the demographic and disease characteristics, and  
31  
32 self-efficacy to manage chronic disease were included as independent variables. In step 2, the  
33  
34 mean score of the remaining signalling questions was added and the magnitude of the change in  
35  
36  $R^2$  was examined. In step 3, the symptom or problem corresponding with the intervention in each  
37  
38 signalling item was added.  
39  
40  
41

42 The assumption of normal distribution of residuals in the regression model was tested  
43  
44 using a normal probability plot. Additionally, correlations between independent variables and  
45  
46 tolerances were calculated to check for multicollinearity. Linearity of the model was assessed  
47  
48 using partial residual plot. All analyses were conducted using Stata version 14.2 (StataCorp,  
49  
50 College Station, TX, USA).  
51  
52  
53  
54  
55  
56  
57  
58  
59  
60

## RESULTS

### Sample Characteristics

Of 1,704 participants with submitted baseline self-report data, n=228 had no data for the SAAS, as SPIN stopped collecting data for this measure in English-speaking Cohort participants after November 7, 2016. Of the 1,476 eligible participants, there were 416 (28.2%) missing one or more variables. A commonly missing value was the time since the onset of the first non-Raynaud's symptom (n=103). The remaining patients (n=313) were missing one or more demographic or patient-reported outcome measures (i.e., signalling or symptom measures).

In total, 1,060 participants had complete data for all variables and were included in regression analyses, including 128 men (12%) and 932 women (88%; Table 1). Most patients (71%) were married or living as married. Mean time since Raynaud's onset was 14.6 (SD=11.6) years; mean time since first non-Raynaud's symptoms was 11.3 (SD=8.5) years; mean time since diagnosis was 9.4 (SD=7.8) years. The mean signalling question scores ranged from 5.1 (body image) to 7.0 (exercise). As shown in Table 2, correlations between signalling question scores ranged from 0.43 (sleep problems with exercise) to 0.71 (body image with emotions and stress).

### Correlates of Signalling Items

Results from the multiple linear regression analyses are shown in Table 3.  $R^2$  for the models ranged from 0.46 (exercise) to 0.64 (self-management). In all models, controlling for other variables, the mean of the remaining signalling questions was most strongly associated with a greater likelihood to participate in an intervention, with standardized regression coefficients ranging from  $\beta = 0.61$  (sleep) to  $\beta = 0.80$  (self-management). The symptom or problem corresponding with the respective signalling question was significantly associated with higher scores on 7 of the 9 the signalling questions: fatigue ( $\beta = 0.30$ ,  $p < 0.001$ ), hand ( $\beta = 0.21$ ,

1  
2  
3 p < 0.001), sleep ( $\beta = 0.43$ ,  $p < 0.001$ ), emotions and stress ( $\beta = 0.18$ ,  $p < 0.001$ ), body image ( $\beta$   
4 = 0.28,  $p < 0.001$ ), pain ( $\beta = 0.32$ ,  $p < 0.001$ ), and nutrition/diet ( $\beta = 0.07$ ,  $p = 0.004$ ). For the  
5  
6 remaining two signalling questions, self-efficacy was not statistically associated with reported  
7  
8 likelihood of participating in a self-management program ( $\beta = -0.03$ ,  $p = 0.124$ ), and physical  
9  
10 activity level was not associated with the exercise intervention signalling question ( $\beta = -0.04$ ,  $p =$   
11  
12 0.130). Higher self-efficacy was significantly associated with higher scores on the signalling  
13  
14 questions for 7 items, including fatigue ( $\beta = 0.10$ ,  $p < 0.001$ ), hand ( $\beta = 0.11$ ,  $p < 0.001$ ), sleep ( $\beta$   
15  
16 = 0.13,  $p < 0.001$ ), body image ( $\beta = 0.09$ ,  $p < 0.001$ ), pain ( $\beta = 0.04$ ,  $p = 0.047$ ), nutrition/diet ( $\beta$   
17  
18 = 0.09,  $p < 0.001$ ), and exercise ( $\beta = 0.16$ ,  $p < 0.001$ ), but not for emotions and stress ( $\beta = 0.03$ ,  $p$   
19  
20 = 0.09,  $p < 0.001$ ), and exercise ( $\beta = 0.16$ ,  $p < 0.001$ ), but not for emotions and stress ( $\beta = 0.03$ ,  $p$   
21  
22 = 0.09,  $p < 0.001$ ), and exercise ( $\beta = 0.16$ ,  $p < 0.001$ ), but not for emotions and stress ( $\beta = 0.03$ ,  $p$   
23  
24 = 0.131) or self-management ( $\beta = -0.03$ ,  $p = 0.124$ ). Finally, there were 6 sociodemographic and  
25  
26 disease variables included in each regression; between 0 and 2 were significantly associated with  
27  
28 signalling question scores, but  $\beta \leq 0.08$  in all cases. Unstandardized regression coefficients (B)  
29  
30 and their 95% confidence intervals from the multivariate linear regression analyses are shown in  
31  
32 Appendix Tables A1-A9.

33  
34  
35 In the hierarchical analyses,  $R^2$ -change was assessed for all 9 models separately  
36  
37 (Appendix Tables A1-A9). The amount of additional variance explained by adding the mean of  
38  
39 the other signalling items to the model ranged from 0.41 (hand function problems) to 0.60 (self-  
40  
41 management). The amount of additional variance explained by adding the symptom or problem  
42  
43 corresponding with the signalling item ranged from <0.01 (exercise) to 0.14 (sleep).  
44  
45  
46

47  
48 Regression diagnostics found no evidence for deviation from the assumption of normal  
49  
50 distribution of residuals for any of the regression models based on a normal probability plot. All  
51  
52 tolerance values were between 0.56 and 0.97, indicating that multicollinearity was not an issue  
53  
54  
55  
56  
57  
58  
59  
60

1  
2  
3 for any of the regression models. Partial residual plots did not show any violation of the linearity  
4  
5 assumption for any of the regression models.  
6

## 7 **DISCUSSION**

8  
9  
10 The main finding of this study was that the most important factor influencing patient-  
11  
12 reported interest in using disease-specific online self-care interventions is general interest in  
13  
14 using online interventions, which explained a substantial amount of additional variance for each  
15  
16 model, ranging from 43% to 60%. The symptom or problem corresponding with the respective  
17  
18 signalling question and higher self-efficacy was significantly associated with higher scores on 7  
19  
20 of the 9 the signalling questions, but added between < 1% and 14% of additional explained  
21  
22 variance.  
23  
24

25  
26 Results from our study suggest that there is a generic factor determining interest in  
27  
28 participation in online self-care interventions. Across settings, it has been shown that the  
29  
30 intention to use technology and the uptake and implementation of technological innovations in  
31  
32 practice are mainly predicted by general factors, including the perceived usefulness, the  
33  
34 perceived ease of use, experience, and greater technology confidence.[40-42] Identifying if these  
35  
36 underlying factors are indeed driving the general interest in our sample of SSc patients could be  
37  
38 useful, as these factors could then be taken into consideration in future trials when patients are  
39  
40 invited to try novel online interventions in SPIN's research context or in other research  
41  
42 programs.  
43  
44

45  
46 To reduce non-acceptance of intervention offers in the cmRCT design, it has been  
47  
48 suggested that cohort participants can be presented with a list of possible interventions as part of  
49  
50 regular cohort data collection and asked if they would agree to use them if offered.[4] It has been  
51  
52 hypothesized that this process would identify the potential accepters in advance and  
53  
54  
55  
56  
57  
58  
59  
60

1  
2  
3 consequently reduce dilution of the intervention effects. The results of our study suggest that  
4 such a signalling question may not need to be intervention-specific, as a higher general interest in  
5 interventions was the main factor associated with higher scores on all signalling items.  
6  
7

8  
9  
10 Identifying factors associated with responses, however, cannot predict actual use of  
11 interventions. Recently, the suggested process of including patients with a high indicated interest  
12 on the cohort's signalling item was applied in the SPIN-HAND feasibility trial, which was  
13 conducted via the SPIN Cohort. SPIN-HAND is an online hand exercise program to improve  
14 hand function for SSc patients. SPIN Cohort participants with at least mild hand function  
15 limitations (CHFS  $\geq 3$ ) and an indicated interest in using an online hand-exercise intervention  
16 (hand signalling question  $\geq 7$ ) were randomised to be offered to use the SPIN-HAND program or  
17 usual care for 3 months. Of the 40 SPIN Cohort participants that were included in the SPIN-  
18 HAND feasibility trial, 24 were allocated to the intervention arm, and 16 to the control group.  
19 Patients in the intervention arm were offered to try the SPIN-HAND program and, afterwards, to  
20 participate in an interview collecting their feedback. In total, 15 of 24 (62.5%) patients consented  
21 to use the SPIN-HAND intervention.[43] Thus, uptake of the offer to try the intervention was  
22 low despite selecting patients based on their indicated interest. This result raises important  
23 questions about using signalling items as an eligibility criterion for participation in RCTs  
24 conducted using the cmRCT design, and it needs to be carefully evaluated how effective these  
25 items are at identifying potential accepters of interventions in advance. Since the SPIN-HAND  
26 feasibility trial with its small sample size provides only preliminary evidence, additional RCTs  
27 using the cmRCT design with larger samples are necessary to confirm this finding.  
28  
29  
30  
31  
32  
33  
34  
35  
36  
37  
38  
39  
40  
41  
42  
43  
44  
45  
46  
47  
48  
49  
50

51 The present study has limitations that should be considered in interpreting its results.  
52 First, the SPIN Cohort constitutes a convenience sample of SSc patients receiving treatment at a  
53  
54  
55  
56  
57  
58  
59  
60



1  
2  
3 SPIN recruiting centre, and patients at these centres may differ from those in other settings.  
4  
5 Additionally, SSc patients in the SPIN Cohort complete questionnaires online, which may further  
6  
7 limit the generalizability of findings, as all participants already have Internet access and are  
8  
9 comfortable using it in a research setting. Third, 28% of the enrolled patients were excluded  
10  
11 from the analyses due to missing data. Fourth, the SPIN interventions under development to be  
12  
13 tested through the Cohort are all online self-care programs, and this is reflected in the signalling  
14  
15 questions that query about these online interventions. Based on our data, however, is not possible  
16  
17 to distinguish whether patients respond to the signalling items based on their interest in the  
18  
19 content of the proposed programs (e.g., their interest in self-management or non-pharmacological  
20  
21 treatments), or whether the online nature of the program drive their responses. Finally, this study  
22  
23 explored an indicated interest (intention) in potentially trying an online intervention, but not the  
24  
25 patients' actual participation in an intervention when it was offered to them. It remains to be  
26  
27 elucidated to what degree these signalling questions may reflect actual acceptance of the offer  
28  
29 when participants are invited to participate in an intervention. Recent experiences with the SPIN-  
30  
31 HAND feasibility trial indicate that the predictive value of these questions may be lower than  
32  
33 anticipated.  
34  
35  
36  
37  
38  
39

40 In sum, findings of the present study suggest that the main factor influencing patients'  
41  
42 interest in participating in a disease-specific online self-care intervention is their general interest  
43  
44 in participating in these types of interventions. It should be further explored what factors may  
45  
46 drive this general interest, as these factors may be taken into consideration when inviting patients  
47  
48 to try novel (online) interventions in a research context.  
49  
50  
51  
52  
53  
54  
55  
56  
57  
58  
59  
60

## **AUTHORS' CONTRIBUTIONS**

LK and BDT were responsible for the study conception. LM and the SPIN Investigators contributed to data collection. LK, JC, MEC, IB, SJB, VLM, LM, WRN, JW and BDT contributed to data analysis and interpretation. LK, JC and BDT contributed to drafting the manuscript. All authors provided a critical revision of the manuscript and approved the final version of the manuscript. BDT is the guarantor.

## **FUNDING STATEMENT**

SPIN has been funded by grants from the Canadian Institutes of Health Research (TR3-119192, PJT-148504, PJT-149073), the Canadian Initiative for Outcomes in Rheumatology Care, and the Arthritis Society. In addition, SPIN has received institutional contributions from the Lady Davis Institute for Medical Research of the Jewish General Hospital, Montreal, Canada and from McGill University, Montreal, Canada. SPIN has also received support from Scleroderma Canada, the Scleroderma Society of Ontario, Sclérodémie Québec, the Scleroderma Society of Nova Scotia, the Scleroderma Association of British Columbia, Scleroderma Manitoba, and the Scleroderma Society of Saskatchewan. Dr. Thombs was supported by a Fonds de Recherche Québec - Santé researcher awards outside of the present work.

## **COMPETING INTERESTS STATEMENT**

The authors have read and understood the BMJ policy on declaration of interests and declare that they have no competing interests.

## **DATA SHARING STATEMENT**

1  
2  
3  
4  
5  
6  
7  
8  
9  
10  
11  
12  
13  
14  
15  
16  
17  
18  
19  
20  
21  
22  
23  
24  
25  
26  
27  
28  
29  
30  
31  
32  
33  
34  
35  
36  
37  
38  
39  
40  
41  
42  
43  
44  
45  
46  
47  
48  
49  
50  
51  
52  
53  
54  
55  
56  
57  
58  
59  
60

Data used in the present study and other SPIN data can be requested via the corresponding author. All requests to use SPIN data will be evaluated per the SPIN Data Sharing and Publication Policy.

For peer review only

## REFERENCES

1. Torgerson DJ, Torgerson CJ. Designing randomised trials in health, education and the social sciences: an introduction. Basingstoke: Palgrave Macmillan; 2008.
2. Evans I, Thornton H, Chalmers I, et al. Testing Treatments: Better research for better healthcare. London: Pinter and Martin Ltd; 2011.
3. McDonald AM, Knight RC, Campbell MK, et al. What influences recruitment to randomized controlled trials? A review of trials funded by two UK funding agencies. *Trials* 2006;7:9.
4. Relton C, Torgerson D, O’Cathain A, et al. Rethinking pragmatic randomised controlled trials: introducing the “cohort multiple randomised controlled trial” design. *BMJ* 2010;340:2.
5. Treweek S, Mitchell E, Pitkethly M, et al. Strategies to improve recruitment to randomised controlled trials. *Cochrane Database Syst Rev* 2010;4:MRMR000013.
6. Watson J, Torgerson D. Increasing recruitment to randomised trials: a review of randomised controlled trials. *BMC Med Res Methodol* 2006;6:34.
7. Campbell M, Snowdon C, Francis D, et al. Recruitment to randomised trials: strategies for trial enrolment and participation study: the STEPS study. *Health Technol Assess* 2007;11:48 iii, ix-105.
8. Treweek S, Lockhart P, Pitkethly M, et al. Methods to improve recruitment to randomised controlled trials: Cochrane systematic review and meta-analysis. *BMJ Open* 2013;3:e002360.

- 1  
2  
3 9. Sully BG, Julious SA, Nicholl J. A reinvestigation of recruitment to randomised,  
4 controlled, multicenter trials: a review of trials funded by two UK funding agencies. *Trials*  
5 2013;14:166.  
6  
7
- 8  
9  
10 10. McDonald AM, Treweek S, Shakur H, et al. Using a business model approach and  
11 marketing techniques for recruitment to clinical trials. *Trials* 2011;12:74.  
12  
13
- 14 11. Donovan JL, Paramasivan S, De Salis I, et al. Clear obstacles and hidden challenges:  
15 understanding recruiter perspectives in six pragmatic randomised controlled trials. *Trials*  
16 2014;15:5.  
17  
18
- 19 12. Mc Cord KA, Al-Shahi Salman R, Treweek S, Gardner H, Strech D, Whiteley W, et al.  
20 Routinely collected data for randomized trials: promises, barriers, and implications. *Trials*  
21 2018;19:29.  
22  
23
- 24 13. James S, Fröbert O, Lagerqvist B. Cardiovascular registries: a novel platform for  
25 randomised clinical trials. *Heart* 2012;98:1329-31.  
26  
27
- 28 14. James S, Rao SV, Granger CB. Registry-based randomized clinical trials-a new clinical  
29 trial paradigm. *Nat Rev Cardiol* 2015;12:312-6.  
30  
31
- 32 15. van Staa TP, Dyson L, McCann G, Padmanabhan S, Belatri R, Goldacre B, et al. The  
33 opportunities and challenges of pragmatic point-of-care randomised trials using routinely  
34 collected electronic records: evaluations of two exemplar trials. *Health Technol Assess*  
35 2014;18:1-146.  
36  
37
- 38 16. Anderson GL, Burns CJ, Larsen J, Shaw PA. Use of administrative data to increase the  
39 practicality of clinical trials: Insights from the Women's Health Initiative. *Clin Trials*  
40 2016;13:519-26.  
41  
42  
43  
44  
45  
46  
47  
48  
49  
50  
51  
52  
53  
54  
55  
56  
57  
58  
59  
60

- 1  
2  
3 17. Kwakkenbos L, Jewett LR, Baron M, Bartlett SJ, Furst D, Gottesman K, et al. The  
4  
5 Scleroderma Patient-centered Intervention Network (SPIN) Cohort: Protocol for a cohort  
6  
7 multiple randomized controlled trial (cmRCT) design to support trials of psychosocial and  
8  
9 rehabilitation interventions in a rare disease context. *BMJ Open* 2013;3:e003563.  
10  
11
- 12 18. Young-Afat DA, van Gils CH, van den Bongard DHJG, Verkooijen HM, UMBRELLA  
13  
14 Study Group. The Utrecht Cohort for Multiple BREast Cancer Intervention Studies and  
15  
16 Long-Term evaLuAtion (UMBRELLA): objectives, design, and baseline results. *Breast*  
17  
18 *Cancer Res Treat* 2017;164:445–50.  
19
- 20 19. Gal R, Monninkhof EM, Groenwold RHH, van Gils CH, van den Bongard DHJG, Peeters  
21  
22 PHM, et al. The effects of exercise on the quality of life of patients with breast cancer (the  
23  
24 UMBRELLA Fit study): study protocol for a randomized controlled trial. *Trials*.  
25  
26 2017;18:504.  
27  
28
- 29 20. Van der Velden JM, Verkooijen HM, Seravalli E, Hes J, Gerlich AS, Kasperts N, et al.  
30  
31 Comparing conVENTional RadioTherapy with stereotactIC body radiotherapy in patients  
32  
33 with spinAL metastases: study protocol for an randomized controlled trial following the  
34  
35 cohort multiple randomized controlled trial design. *BMC Cancer*. 2016;16:909.  
36  
37
- 38 21. Burbach JP, Verkooijen HM, Intven M, Kleijnen JP, Bosman ME, Raaymakers BW, et al.  
39  
40 RandomizEd Controlled Trial for Pre-operAtive Dose-escaLation BOOST in Locally  
41  
42 Advanced Rectal Cancer (RECTAL BOOST Study): study protocol for a randomized  
43  
44 controlled trial. *Trials* 2015;16:58.  
45  
46  
47
- 48 22. Couwenberg, AM, Burbach MJP, Smits AB, van Vulpen M, van Grevenstein WM,  
49  
50 Noordzij PG, et al. The Impact of Retractor SPONGE-Assisted Laparoscopic Surgery on  
51  
52 Duration of Hospital Stay and Postoperative Complications in Patients with Colorectal  
53  
54  
55  
56  
57  
58  
59  
60

- 1  
2  
3 Cancer (SPONGE Trial): study protocol for a randomized controlled  
4 trial. *Trials* 2016;17:132.  
5  
6  
7  
8 23. Candlish J, Pate A, Sperrin M, van Staa T; GetReal Work Package 2. Evaluation of biases  
9 present in the cohort multiple randomised controlled trial design: a simulation study. *BMC*  
10 *Med Res Methodol.* 2017 Jan 31;17(1):17  
11  
12  
13  
14 24. Seibold J. Scleroderma. In Harris ED, Budd RC, Firestein GS, et al. (Eds.). *Kelley's*  
15 *Textbook of Rheumatology*. Philadelphia, Elsevier, 2005:1279-308.  
16  
17  
18 25. Wigley FM, Hummers LK. Clinical features of systemic sclerosis. In Hochberg MC,  
19 Silman AJ, Smolen JS, et al. (Eds.): *Rheumatology*. Philadelphia, Mosby, 2003:1463-80.  
20  
21  
22 26. Kwakkenbos L, Delisle VC, Fox RS, et al. Psychosocial aspects of scleroderma. *Rheum*  
23 *Dis Clin North Am* 2015;41:519-28.  
24  
25  
26  
27 27. Thombs BD, van Lankveld W, Bassel M, et al. Psychological health and well-being in  
28 systemic sclerosis: state of the science and consensus research agenda. *Arthritis Care Res*  
29 2010;62:1181-9.  
30  
31  
32  
33 28. Bassel M, Hudson M, Taillefer SS, et al. Frequency and impact of symptoms experienced  
34 by patients with systemic sclerosis: results from a Canadian National Survey.  
35 *Rheumatology* 2011;50:762-7.  
36  
37  
38  
39 29. van den Hoogen F, Khanna D, Fransen J, Johnson SR, Baron M, Tyndall A, et al. 2013  
40 Classification criteria for systemic sclerosis: An American College of  
41 Rheumatology/European League Against Rheumatism collaborative initiative. *Arthritis*  
42 *Rheum* 2013;65:2737-47.  
43  
44  
45  
46  
47  
48  
49  
50  
51  
52  
53  
54  
55  
56  
57  
58  
59  
60

- 1  
2  
3 30. LeRoy EC, Black C, Fleischmajer R, Jablonska S, Krieg T, Medsger TA Jr, et al.  
4  
5 Scleroderma (systemic sclerosis): Classification, subsets and pathogenesis. *J Rheumatol*  
6  
7 1988;15:202-5.  
8  
9  
10 31. Clements P, Lachenbruch P, Siebold J, White B, Weiner S, Martin R, et al. Inter and  
11  
12 intraobserver variability of total skin thickness score (modified Rodnan TSS) in systemic  
13  
14 sclerosis. *J Rheumatol*. 1995; 22:1281–5.  
15  
16  
17 32. Ritter PL, Lorig K. The English and Spanish Self-Efficacy to Manage Chronic Disease  
18  
19 Scale measures were validated using multiple studies. *J Clin Epidemiol* 2014;67:1265-73  
20  
21  
22 33. Riehm KE, Kwakkenbos L, Carrier ME, Bartlett SJ, Malcarne VL, Mouthon L, et al.  
23  
24 Validation of the Self-Efficacy for Managing Chronic Disease (SEMCD) Scale: A  
25  
26 Scleroderma Patient-centered Intervention Network (SPIN) Cohort Study. *Arthritis Care*  
27  
28 *Res* 2016;68:1195-200.  
29  
30  
31 34. The NIH Patient-Reported Outcomes Measurement Information System.  
32  
33 [http://www.healthmeasures.net/explore-measurement-systems/promis]. Accessed October  
34  
35 3, 2018.  
36  
37  
38 35. Kwakkenbos L, Thombs BD, Khanna D, Carrier ME, Baron M, Furst D, et al. Performance  
39  
40 of the Patient-Reported Outcomes Measurement Information System-29 in scleroderma: a  
41  
42 Scleroderma Patient-centered Intervention Network Cohort study. *Rheumatology*. 2017;  
43  
44 56:1302-11.  
45  
46  
47 36. Duruöz MT, Poiraudau S, Fermanian J, Menkes CJ, Amor B, Dougados M, et al.  
48  
49 Development and validation of a rheumatoid hand functional disability scale that assesses  
50  
51 functional handicap. *J Rheumatol* 1996;23:1167-72.  
52  
53  
54  
55  
56  
57  
58  
59  
60



- 1  
2  
3 37. Rannou F, Poiraudeau S, Berezne A, Baubet T, Le-guern V, Cabane J, et al. Assessing  
4 disability and quality of life in systemic sclerosis: construct validities of the Cochin Hand  
5 Function Scale, Health Assessment Questionnaire (HAQ), Systemic Sclerosis HAQ, and  
6 Medical Outcomes Study 36-Item Short Form Health Survey. *Arthritis Rheumatol*  
7 2007;57:94-102.  
8  
9  
10  
11  
12  
13  
14 38. Hart TA, Flora DB, Palyo SA, Fresco DM, Holle C, Heimberg RG. Development and  
15 examination of the Social Appearance Anxiety Scale. *Assessment* 2008;15:48–59.  
16  
17  
18 39. Mills SD, Kwakkenbos L, Carrier ME, et al. Validation of the Social Appearance Anxiety  
19 Scale in patients with systemic sclerosis: a Scleroderma Patient-Centered Intervention  
20 Network Cohort study. *Arthritis Care Res.* 2018;70:1557-1562.  
21  
22  
23  
24  
25  
26 40. Hofstede J, de Bie J, van Wijngaarden B, Heijmans M. Knowledge, use and attitude toward  
27 eHealth among patients with chronic lung diseases. *Int J Med Inform.* 2014;83:967-974.  
28  
29  
30  
31 41. Edwards L, Thomas C, Gregory A, Yardley L, O'Cathain A, Montgomery AA, Salisbury  
32 C. Are people with chronic diseases interested in using telehealth? A cross-sectional postal  
33 survey. *J Med Internet Res.* 2014;16:e123.  
34  
35  
36  
37 42. King, William R.; HE, Jun. A meta-analysis of the technology acceptance  
38 model. *Information & Management.* 2006;43:740-755.  
39  
40  
41  
42 43. Kwakkenbos L, Carrier ME, Boutron I, Welling J, Sauve M, van den Ende CHM, et al.  
43 Randomized feasibility trial of the Scleroderma Patient-centered Intervention Network  
44 Hand Exercise Program (SPIN-HAND). *J Scleroderma Relat Disord.* 2018;3:S199–209.  
45  
46  
47  
48  
49  
50  
51  
52  
53  
54  
55  
56  
57  
58  
59  
60

**Table 1. Demographic characteristics (N=1,060)**

| Variable                                                                 | Value       |
|--------------------------------------------------------------------------|-------------|
| <b>Demographic</b>                                                       |             |
| Age in years, mean (SD)                                                  | 54.6 (12.2) |
| Female sex, n (%)                                                        | 932 (88)    |
| Education in years, mean (SD)                                            | 15.0 (3.6)  |
| Married or living as married, n (%)                                      | 751 (71)    |
| Country, n (%)                                                           |             |
| Canada                                                                   | 273 (26)    |
| United States                                                            | 416 (39)    |
| United Kingdom                                                           | 117 (11)    |
| France                                                                   | 218 (21)    |
| Spain                                                                    | 32 (3)      |
| Mexico                                                                   | 4 (0)       |
| <b>Disease characteristics</b>                                           |             |
| Time since onset first non-Raynaud's symptom or sign in years, mean (SD) | 11.3 (8.5)  |
| Time since onset Raynaud's in years, mean (SD) <sup>a</sup>              | 14.6 (11.6) |
| Time since diagnosis in years, mean (SD) <sup>b</sup>                    | 9.4 (7.8)   |
| Diffuse disease subtype, n (%)                                           | 439 (41.4)  |
| Modified Rodnan Skin Score, mean (SD) <sup>c</sup>                       | 8.1 (8.6)   |
| <b>Signalling question scores:</b>                                       |             |
| Fatigue, mean (SD)                                                       | 6.8 (3.2)   |
| Hand function and mobility, mean (SD)                                    | 6.8 (3.4)   |
| Sleep problems, mean (SD)                                                | 6.0 (3.7)   |
| Emotions and stress, mean (SD)                                           | 5.8 (3.6)   |
| Body image and appearance, mean (SD)                                     | 5.1 (3.7)   |

|                                               |           |
|-----------------------------------------------|-----------|
| Pain, mean (SD)                               | 6.3 (3.4) |
| Self-management/ coping strategies, mean (SD) | 6.6 (3.3) |
| Nutrition/Diet, mean (SD)                     | 6.9 (3.2) |
| Exercise, mean (SD)                           | 7.0 (2.9) |

---

Due to missing data: <sup>a</sup>N=986, <sup>b</sup>N=1,053, <sup>c</sup>N=879

For peer review only

**Table 2. Correlations between signalling items (n = 1,060)**

|                                | (1)  | (2)  | (3)  | (4)  | (5)  | (6)  | (7)  | (8)  | (9)  |
|--------------------------------|------|------|------|------|------|------|------|------|------|
| (1) Fatigue                    | 1.00 |      |      |      |      |      |      |      |      |
| (2) Hand function and mobility | 0.55 | 1.00 |      |      |      |      |      |      |      |
| (3) Sleep problems             | 0.63 | 0.46 | 1.00 |      |      |      |      |      |      |
| (4) Emotions and stress        | 0.60 | 0.47 | 0.61 | 1.00 |      |      |      |      |      |
| (5) Concerns about body image  | 0.49 | 0.46 | 0.52 | 0.71 | 1.00 |      |      |      |      |
| (6) Pain                       | 0.62 | 0.59 | 0.58 | 0.61 | 0.53 | 1.00 |      |      |      |
| (7) Self-management            | 0.60 | 0.63 | 0.53 | 0.65 | 0.60 | 0.69 | 1.00 |      |      |
| (8) Nutrition and diet         | 0.53 | 0.49 | 0.48 | 0.57 | 0.52 | 0.52 | 0.65 | 1.00 |      |
| (9) Exercise                   | 0.47 | 0.52 | 0.43 | 0.50 | 0.48 | 0.46 | 0.60 | 0.70 | 1.00 |

\*All correlations are significant with  $p < 0.001$

**Table 3. Multiple linear regression analyses of the relationship between sociodemographic and disease variables with the signalling questions (n = 1,060)**

|                                    | <b>Fatigue<sup>1</sup></b> | <b>Hand function and mobility<sup>2</sup></b> | <b>Sleep problems<sup>3</sup></b> | <b>Emotions and stress<sup>4</sup></b> | <b>Body image<sup>5</sup></b> | <b>Pain<sup>6</sup></b> | <b>Self-management</b> | <b>Nutrition and diet<sup>7</sup></b> | <b>Exercise<sup>8</sup></b> |
|------------------------------------|----------------------------|-----------------------------------------------|-----------------------------------|----------------------------------------|-------------------------------|-------------------------|------------------------|---------------------------------------|-----------------------------|
|                                    | <b>β (P-value)</b>         | <b>β (P-value)</b>                            | <b>β (P-value)</b>                | <b>β (P-value)</b>                     | <b>β (P-value)</b>            | <b>β (P-value)</b>      | <b>β (P-value)</b>     | <b>β (P-value)</b>                    | <b>β (P-value)</b>          |
| Age in years                       | 0.05 (0.03)                | 0.02 (0.41)                                   | 0.08 (<0.01)                      | -0.08 (<0.01)                          | -0.05 (0.02)                  | 0.01 (0.70)             | 0.03 (0.18)            | <-0.01 (0.95)                         | 0.01 (0.73)                 |
| Male sex                           | 0.06 (<0.01)               | 0.02 (0.43)                                   | 0.01 (0.60)                       | -0.02 (0.26)                           | -0.03 (0.11)                  | 0.04 (0.03)             | <0.01 (0.84)           | -0.05 (0.01)                          | -0.02 (0.31)                |
| Disease duration                   | -0.02 (0.44)               | -0.01 (0.58)                                  | <-0.01 (0.94)                     | -0.03 (0.10)                           | -0.02 (0.35)                  | 0.01 (0.47)             | -0.01 (0.78)           | -0.02 (0.36)                          | <-0.01 (0.98)               |
| Diffuse disease                    | -0.05 (0.02)               | 0.02 (0.31)                                   | -0.04 (0.08)                      | -0.02 (0.42)                           | 0.01 (0.63)                   | -0.03 (0.19)            | 0.02 (0.34)            | -0.01 (0.62)                          | 0.03 (0.27)                 |
| Education in years                 | <0.01 (0.87)               | <-0.01 (0.99)                                 | 0.03 (0.10)                       | 0.01 (0.60)                            | -0.06 (0.01)                  | -0.05 (<0.01)           | -0.01 (0.47)           | 0.06 (0.01)                           | 0.07 (<0.01)                |
| Married or living as married       | 0.03 (0.21)                | 0.03 (0.19)                                   | <-0.01 (0.95)                     | -0.04 (0.03)                           | <0.01 (0.88)                  | 0.02 (0.43)             | 0.01 (0.45)            | -0.01 (0.61)                          | -0.01 (0.69)                |
| Self-efficacy                      | 0.10 (<0.01)               | 0.11 (<0.01)                                  | 0.13 (<0.01)                      | 0.03 (0.13)                            | 0.09 (<0.01)                  | 0.04 (0.05)             | -0.03 (0.12)           | 0.09 (<0.01)                          | 0.16 (<0.01)                |
| Symptom measure                    | 0.30 (<0.01)               | 0.21 (<0.01)                                  | 0.43 (<0.01)                      | 0.18 (<0.01)                           | 0.28 (<0.01)                  | 0.32 (<0.01)            | ---                    | 0.07 (<0.01)                          | -0.04 (0.13)                |
| Mean of remaining signalling items | 0.65 (<0.01)               | 0.63 (<0.01)                                  | 0.61 (<0.01)                      | 0.72 (<0.01)                           | 0.64 (<0.01)                  | 0.67 (<0.01)            | 0.80 (<0.01)           | 0.71 (<0.01)                          | 0.70 (<0.01)                |
| R <sup>2</sup>                     | 0.58                       | 0.47                                          | 0.61                              | 0.62                                   | 0.55                          | 0.64                    | 0.64                   | 0.51                                  | 0.46                        |

β: standardized regression coefficient

Symptom measures for the models: <sup>1</sup>PROMIS-29 Fatigue; <sup>2</sup>Cochin Hand Function; <sup>3</sup>PROMIS-29 sleep; <sup>4</sup>PROMIS-29 depression; <sup>5</sup>SAAS score; <sup>6</sup>PROMIS-29 Pain; <sup>7</sup>Interference of GI symptoms; <sup>8</sup>Activity level

## APPENDIX

**Table A1. Multiple linear regression of the relationship between sociodemographic and disease variables with signalling question on fatigue (n = 1,060)**

|                                    | B (95% CI)             | $\beta$ | P      |
|------------------------------------|------------------------|---------|--------|
| <b>Step 1:</b>                     |                        |         |        |
| Age in years                       | 0.01 (0.00 to 0.02)    | 0.05    | 0.031  |
| Male sex                           | 0.64 (0.24 to 1.03)    | 0.06    | 0.002  |
| Disease duration                   | -0.01 (-0.02 to 0.01)  | -0.02   | 0.442  |
| Diffuse disease                    | -0.31 (-0.58 to -0.04) | -0.05   | 0.023  |
| Education in years                 | 0.00 (-0.03 to 0.04)   | <0.01   | 0.867  |
| Married or living as married       | 0.18 (-0.10 to 0.47)   | 0.03    | 0.208  |
| Self-efficacy                      | 0.14 (0.07 to 0.22)    | 0.10    | <0.001 |
| <i>Total R<sup>2</sup></i>         | 0.04                   |         |        |
| <b>Step 2:</b>                     |                        |         |        |
| Mean of remaining signalling items | 0.80 (0.75 to 0.85)    | 0.65    | <0.001 |
| <i>Total R<sup>2</sup></i>         | 0.53                   |         |        |
| <i>R<sup>2</sup> change</i>        | 0.49                   |         | <0.001 |
| <b>Step 3:</b>                     |                        |         |        |
| PROMIS-29 Fatigue                  | 0.09 (0.08 to 0.11)    | 0.30    | <0.001 |
| <i>Total R<sup>2</sup></i>         | 0.58                   |         |        |
| <i>R<sup>2</sup> change</i>        | 0.05                   |         | <0.001 |

B (95% CI): raw regression coefficient and 95% confidence interval;  $\beta$ : standardized regression coefficient

All B and  $\beta$  values are for the Step 3 model.

**Table A2. Multiple linear regression of the relationship between sociodemographic and disease variables with signalling question on hand function and mobility (n = 1,060)**

|                                    | <b>B (95% CI)</b>     | <b>β</b> | <b>P</b> |
|------------------------------------|-----------------------|----------|----------|
| <b>Step 1:</b>                     |                       |          |          |
| Age in years                       | 0.01 (-0.01 to 0.02)  | 0.02     | 0.407    |
| Male sex                           | 0.19 (-0.27 to 0.65)  | 0.02     | 0.425    |
| Disease duration                   | -0.01 (-0.02 to 0.01) | -0.01    | 0.578    |
| Diffuse disease                    | 0.17 (-0.16 to 0.49)  | 0.02     | 0.311    |
| Education in years                 | 0.00 (-0.04 to 0.04)  | <-0.01   | 0.986    |
| Married or living as married       | 0.22 (-0.11 to 0.56)  | 0.03     | 0.190    |
| Self-efficacy                      | 0.16 (0.09 to 0.24)   | 0.11     | <0.001   |
| <i>Total R<sup>2</sup></i>         | 0.03                  |          |          |
| <b>Step 2:</b>                     |                       |          |          |
| Mean of remaining signalling items | 0.80 (0.75 to 0.86)   | 0.63     | <0.001   |
| <i>Total R<sup>2</sup></i>         | 0.44                  |          |          |
| <i>R<sup>2</sup> change</i>        | 0.41                  |          | <0.001   |
| <b>Step 3:</b>                     |                       |          |          |
| Cochin Hand function               | 0.04 (0.03 to 0.05)   | 0.21     | <0.001   |
| <i>Total R<sup>2</sup></i>         | 0.47                  |          |          |
| <i>R<sup>2</sup> change</i>        | 0.03                  |          | <0.001   |

B (95% CI): raw regression coefficient and 95% confidence interval; β: standardized regression coefficient

All B and β values are for the Step 3 model.

**Table A3. Multiple linear regression of the relationship between sociodemographic and disease variables with signalling question on sleep problems (n = 1,060)**

|                                    | <b>B (95% CI)</b>     | <b>β</b> | <b>P</b> |
|------------------------------------|-----------------------|----------|----------|
| <b>Step 1:</b>                     |                       |          |          |
| Age in years                       | 0.02 (0.01 to 0.03)   | 0.08     | <0.001   |
| Male sex                           | 0.12 (-0.32 to 0.55)  | 0.01     | 0.596    |
| Disease duration                   | 0.00 (-0.02 to 0.02)  | <-0.01   | 0.936    |
| Diffuse disease                    | -0.26 (-0.56 to 0.03) | -0.04    | 0.080    |
| Education in years                 | 0.03 (-0.01 to 0.07)  | 0.03     | 0.098    |
| Married or living as married       | -0.01 (-0.32 to 0.30) | <-0.01   | 0.949    |
| Self-efficacy                      | 0.21 (0.14 to 0.28)   | 0.13     | <0.001   |
| <i>Total R<sup>2</sup></i>         | 0.03                  |          |          |
| <b>Step 2:</b>                     |                       |          |          |
| Mean of remaining signalling items | 0.85 (0.80 to 0.91)   | 0.61     | <0.001   |
| <i>Total R<sup>2</sup></i>         | 0.46                  |          |          |
| <i>R<sup>2</sup> change</i>        | 0.43                  |          | <0.001   |
| <b>Step 3:</b>                     |                       |          |          |
| PROMIS-29 sleep                    | 0.18 (0.16 to 0.20)   | 0.43     | <0.001   |
| <i>Total R<sup>2</sup></i>         | 0.61                  |          |          |
| <i>R<sup>2</sup> change</i>        | 0.14                  |          | <0.001   |

B (95% CI): raw regression coefficient and 95% confidence interval; β: standardized regression coefficient

All B and β values are for the Step 3 model.



**Table A4. Multiple linear regression of the relationship between sociodemographic and disease variables with signalling question on emotions and stress (n = 1,060)**

|                                    | <b>B (95% CI)</b>      | <b>β</b> | <b>P</b> |
|------------------------------------|------------------------|----------|----------|
| <b>Step 1:</b>                     |                        |          |          |
| Age in years                       | -0.02 (-0.03 to -0.01) | -0.08    | <0.001   |
| Male sex                           | -0.24 (-0.65 to 0.17)  | -0.02    | 0.257    |
| Disease duration                   | -0.01 (-0.03 to 0.00)  | -0.03    | 0.096    |
| Diffuse disease                    | -0.11 (-0.39 to 0.16)  | -0.02    | 0.421    |
| Education in years                 | 0.01 (-0.03 to 0.05)   | 0.01     | 0.597    |
| Married or living as married       | -0.33 (-0.62 to -0.03) | -0.04    | 0.032    |
| Self-efficacy                      | 0.05 (-0.02 to 0.13)   | 0.03     | 0.131    |
| <i>Total R<sup>2</sup></i>         | 0.08                   |          |          |
| <b>Step 2:</b>                     |                        |          |          |
| Mean of remaining signalling items | 0.99 (0.93 to 1.04)    | 0.72     | <0.001   |
| <i>Total R<sup>2</sup></i>         | 0.60                   |          |          |
| <i>R<sup>2</sup> change</i>        | 0.52                   |          | <0.001   |
| <b>Step 3:</b>                     |                        |          |          |
| PROMIS-29 depression               | 0.07 (0.05 to 0.08)    | 0.18     | <0.001   |
| <i>Total R<sup>2</sup></i>         | 0.63                   |          |          |
| <i>R<sup>2</sup> change</i>        | 0.02                   |          | <0.001   |

B (95% CI): raw regression coefficient and 95% confidence interval; β: standardized regression coefficient

All B and β values are for the Step 3 model.

**Table A5. Multiple linear regression of the relationship between sociodemographic and disease variables with signalling question on concerns about body image (n = 1,060)**

|                                    | <b>B (95% CI)</b>      | <b>β</b> | <b>P</b> |
|------------------------------------|------------------------|----------|----------|
| <b>Step 1:</b>                     |                        |          |          |
| Age in years                       | -0.02 (-0.03 to 0.00)  | -0.05    | 0.023    |
| Male sex                           | -0.38 (-0.85 to 0.09)  | -0.03    | 0.109    |
| Disease duration                   | -0.01 (-0.03 to 0.01)  | -0.02    | 0.350    |
| Diffuse disease                    | 0.08 (-0.24 to 0.40)   | 0.01     | 0.627    |
| Education in years                 | -0.06 (-0.10 to -0.01) | -0.06    | 0.009    |
| Married or living as married       | 0.03 (-0.31 to 0.36)   | <0.01    | 0.879    |
| Self-efficacy                      | 0.16 (0.08 to 0.23)    | 0.09     | <0.001   |
| <i>Total R<sup>2</sup></i>         | 0.07                   |          |          |
| <b>Step 2:</b>                     |                        |          |          |
| Mean of remaining signalling items | 0.91 (0.85 to 0.97)    | 0.64     | <0.001   |
| <i>Total R<sup>2</sup></i>         | 0.49                   |          |          |
| <i>R<sup>2</sup> change</i>        | 0.43                   |          | <0.001   |
| <b>Step 3:</b>                     |                        |          |          |
| SAAS score                         | 0.08 (0.06 to 0.09)    | 0.28     | <0.001   |
| <i>Total R<sup>2</sup></i>         | 0.55                   |          |          |
| <i>R<sup>2</sup> change</i>        | 0.06                   |          | <0.001   |

B (95% CI): raw regression coefficient and 95% confidence interval; β: standardized regression coefficient

All B and β values are for the Step 3 model.

**Table A6. Multiple linear regression of the relationship between sociodemographic and disease variables with signalling question on pain (n = 1,060)**

|                                    | <b>B (95% CI)</b>      | <b>β</b> | <b>P</b> |
|------------------------------------|------------------------|----------|----------|
| <b>Step 1:</b>                     |                        |          |          |
| Age in years                       | 0.00 (-0.01 to 0.01)   | 0.01     | 0.696    |
| Male sex                           | 0.42 (0.04 to 0.81)    | 0.04     | 0.032    |
| Disease duration                   | 0.01 (-0.01 to 0.02)   | 0.01     | 0.467    |
| Diffuse disease                    | -0.17 (-0.44 to 0.09)  | -0.03    | 0.193    |
| Education in years                 | -0.05 (-0.09 to -0.02) | -0.05    | 0.005    |
| Married or living as married       | 0.11 (-0.17 to 0.39)   | 0.02     | 0.426    |
| Self-efficacy                      | 0.07 (0.00 to 0.14)    | 0.04     | 0.047    |
| <i>Total R<sup>2</sup></i>         |                        |          |          |
| <b>Step 2:</b>                     |                        |          |          |
| Mean of remaining signalling items | 0.86 (0.81 to 0.91)    | 0.67     | <0.001   |
| <i>Total R<sup>2</sup></i>         |                        |          |          |
| <i>R<sup>2</sup> change</i>        |                        |          |          |
|                                    | 0.57                   |          | <0.001   |
| <b>Step 3:</b>                     |                        |          |          |
| PROMIS-29 Pain                     | 0.12 (0.10 to 0.13)    | 0.32     | <0.001   |
| <i>Total R<sup>2</sup></i>         |                        |          |          |
| <i>R<sup>2</sup> change</i>        |                        |          |          |
|                                    | 0.07                   |          | <0.001   |

B (95% CI): raw regression coefficient and 95% confidence interval; β: standardized regression coefficient

All B and β values are for the Step 3 model.

**Table A7. Multiple linear regression of the relationship between sociodemographic and disease variables with signalling question on self-management (n = 1,060)**

|                                    | <b>B (95% CI)</b>     | <b>β</b> | <b>P</b> |
|------------------------------------|-----------------------|----------|----------|
| <b>Step 1:</b>                     |                       |          |          |
| Age in years                       | 0.01 (0.00 to 0.02)   | 0.03     | 0.176    |
| Male sex                           | 0.04 (-0.34 to 0.41)  | <0.01    | 0.843    |
| Disease duration                   | 0.00 (-0.02 to 0.01)  | -0.01    | 0.775    |
| Diffuse disease                    | 0.12 (-0.13 to 0.38)  | 0.02     | 0.335    |
| Education in years                 | -0.01 (-0.05 to 0.02) | -0.01    | 0.466    |
| Married or living as married       | 0.10 (-0.17 to 0.37)  | 0.01     | 0.453    |
| Self-efficacy                      | -0.04 (-0.10 to 0.01) | -0.03    | 0.124    |
| <i>Total R<sup>2</sup></i>         | 0.04                  |          |          |
| <b>Step 2:</b>                     |                       |          |          |
| Mean of remaining signalling items | 1.01 (0.96 to 1.06)   | 0.80     | <0.001   |
| <i>Total R<sup>2</sup></i>         | 0.64                  |          |          |
| <i>R<sup>2</sup> change</i>        | 0.60                  |          | <0.001   |

B (95% CI): raw regression coefficient and 95% confidence interval; β: standardized regression coefficient

All B and β values are for the Step 3 model.

**Table A8. Multiple linear regression of the relationship between sociodemographic and disease variables with signalling question on nutrition/diet (n = 1,060)**

|                                    | <b>B (95% CI)</b>      | <b>β</b> | <b>P</b> |
|------------------------------------|------------------------|----------|----------|
| <b>Step 1:</b>                     |                        |          |          |
| Age in years                       | 0.00 (-0.01 to 0.01)   | <-0.01   | 0.949    |
| Male sex                           | -0.53 (-0.94 to -0.11) | -0.05    | 0.014    |
| Disease duration                   | -0.01 (-0.02 to 0.01)  | -0.02    | 0.356    |
| Diffuse disease                    | -0.07 (-0.35 to 0.21)  | -0.01    | 0.621    |
| Education in years                 | 0.05 (0.01 to 0.09)    | 0.06     | 0.011    |
| Married or living as married       | -0.08 (-0.38 to 0.22)  | -0.01    | 0.613    |
| Self-efficacy                      | 0.12 (0.06 to 0.19)    | 0.09     | <0.001   |
| <i>Total R<sup>2</sup></i>         | 0.03                   |          |          |
| <b>Step 2:</b>                     |                        |          |          |
| Mean of remaining signalling items | 0.84 (0.79 to 0.89)    | 0.71     | <0.001   |
| <i>Total R<sup>2</sup></i>         | 0.51                   |          |          |
| <i>R<sup>2</sup> change</i>        | 0.48                   |          | <0.001   |
| <b>Step 3:</b>                     |                        |          |          |
| Interference of GI symptoms        | 0.07 (0.02 to 0.12)    | 0.07     | 0.004    |
| <i>Total R<sup>2</sup></i>         | 0.51                   |          |          |
| <i>R<sup>2</sup> change</i>        | <0.01                  |          | <0.001   |

B (95% CI): raw regression coefficient and 95% confidence interval; β: standardized regression coefficient

All B and β values are for the Step 3 model.

**Table A9. Multiple linear regression of the relationship between sociodemographic and disease variables with signalling question on exercise (n = 1,060)**

|                                    | <b>B (95% CI)</b>     | <b>β</b> | <b>P</b> |
|------------------------------------|-----------------------|----------|----------|
| <b>Step 1:</b>                     |                       |          |          |
| Age in years                       | 0.00 (-0.01 to 0.01)  | 0.01     | 0.725    |
| Male sex                           | -0.21 (-0.62 to 0.20) | -0.02    | 0.313    |
| Disease duration                   | 0.00 (-0.02 to 0.02)  | <-0.01   | 0.981    |
| Diffuse disease                    | 0.15 (-0.12 to 0.43)  | 0.03     | 0.273    |
| Education in years                 | 0.06 (0.02 to 0.09)   | 0.07     | 0.003    |
| Married or living as married       | -0.06 (-0.35 to 0.23) | -0.01    | 0.689    |
| Self-efficacy                      | 0.21 (0.14 to 0.27)   | 0.16     | <0.001   |
| <i>Total R<sup>2</sup></i>         | 0.02                  |          |          |
| <b>Step 2:</b>                     |                       |          |          |
| Mean of remaining signalling items | 0.74 (0.69 to 0.79)   | 0.70     | <0.001   |
| <i>Total R<sup>2</sup></i>         | 0.46                  |          |          |
| <i>R<sup>2</sup> change</i>        | 0.44                  |          | <0.001   |
| <b>Step 3:</b>                     |                       |          |          |
| Activity level                     | -0.10 (-0.24 to 0.03) | -0.04    | 0.130    |
| <i>Total R<sup>2</sup></i>         | 0.46                  |          |          |
| <i>R<sup>2</sup> change</i>        | <0.01                 |          | 0.13     |

B (95% CI): raw regression coefficient and 95% confidence interval; β: standardized regression coefficient

All B and β values are for the Step 3 model.

# BMJ Open

## Factors Associated with Patient-reported Likelihood of Using Online Self-care Interventions: A Scleroderma Patient-centered Intervention Network (SPIN) Cohort Study

|                                 |                                                                                                                                                                                                                                                                                                                                                                                                                                                                                                                                                                                                                                                                                                                                                                                                                                                                        |
|---------------------------------|------------------------------------------------------------------------------------------------------------------------------------------------------------------------------------------------------------------------------------------------------------------------------------------------------------------------------------------------------------------------------------------------------------------------------------------------------------------------------------------------------------------------------------------------------------------------------------------------------------------------------------------------------------------------------------------------------------------------------------------------------------------------------------------------------------------------------------------------------------------------|
| Journal:                        | <i>BMJ Open</i>                                                                                                                                                                                                                                                                                                                                                                                                                                                                                                                                                                                                                                                                                                                                                                                                                                                        |
| Manuscript ID                   | bmjopen-2019-029542.R1                                                                                                                                                                                                                                                                                                                                                                                                                                                                                                                                                                                                                                                                                                                                                                                                                                                 |
| Article Type:                   | Original research                                                                                                                                                                                                                                                                                                                                                                                                                                                                                                                                                                                                                                                                                                                                                                                                                                                      |
| Date Submitted by the Author:   | 26-Aug-2019                                                                                                                                                                                                                                                                                                                                                                                                                                                                                                                                                                                                                                                                                                                                                                                                                                                            |
| Complete List of Authors:       | Kwakkenbos, Linda; Radboud University, Behavioural Science Institute, Clinical Psychology<br>Cumin, Julie; Jewish General Hospital, Lady Davis Institute for Medical Research<br>Carrier, Marie-Eve; Jewish General Hospital, Lady Davis Institute for Medical Research<br>Bartlett, Susan; McGill University, Medicine<br>Malcarne, Vanessa; San Diego State University, Psychology; San Diego State University/University of California, San Diego Joint Doctoral Program in Clinical Psychology<br>Mouthon, Luc; Université Paris Descartes, Assistance Publique-Hôpitaux de Paris (AP-HP)<br>Nielson, Warren; St. Joseph's Health Care, Beryl & Richard Ivey Rheumatology Day Programs<br>Rannou, F; University Paris Descartes<br>Welling, Joep; NVLE Dutch patient organization for systemic autoimmune diseases<br>Thombs, Brett; McGill University, Psychiatry |
| <b>Primary Subject Heading</b>: | Patient-centred medicine                                                                                                                                                                                                                                                                                                                                                                                                                                                                                                                                                                                                                                                                                                                                                                                                                                               |
| Secondary Subject Heading:      | Research methods, Rehabilitation medicine                                                                                                                                                                                                                                                                                                                                                                                                                                                                                                                                                                                                                                                                                                                                                                                                                              |
| Keywords:                       | RHEUMATOLOGY, Systemic sclerosis, Clinical trials < THERAPEUTICS, cohort multiple RCT                                                                                                                                                                                                                                                                                                                                                                                                                                                                                                                                                                                                                                                                                                                                                                                  |
|                                 |                                                                                                                                                                                                                                                                                                                                                                                                                                                                                                                                                                                                                                                                                                                                                                                                                                                                        |

SCHOLARONE™  
Manuscripts

## Factors Associated with Patient-reported Likelihood of Using Online Self-care

### Interventions: A Scleroderma Patient-centered Intervention Network (SPIN) Cohort Study

Linda Kwakkenbos, PhD<sup>1</sup>; Julie Cumin, BA<sup>2</sup>; Marie-Eve Carrier, MSc<sup>2</sup>; Susan J. Bartlett, PhD<sup>3,4,5</sup>; Vanessa L. Malcarne, PhD<sup>6,7</sup>; Luc Mouthon, MD, PhD<sup>8,9</sup>; Warren R. Nielson, PhD<sup>10,11</sup>; François Rannou, MD, PhD<sup>8</sup>; Joep Welling<sup>12</sup>; Brett D. Thombs, PhD<sup>2,3,13-16</sup>; and the SPIN Investigators<sup>17</sup>

<sup>1</sup>Behavioural Science Institute, Clinical Psychology, Radboud University, Nijmegen, the Netherlands

<sup>2</sup>Lady Davis Institute for Medical Research, Jewish General Hospital, Montréal, Québec, Canada

<sup>3</sup>Department of Medicine, McGill University, Montréal, Québec, Canada

<sup>4</sup>McGill University Health Center, Montréal, Québec, Canada

<sup>5</sup>Department of Medicine, Division of Rheumatology, Johns Hopkins University School of Medicine, Baltimore, Maryland, USA

<sup>6</sup>Department of Psychology, San Diego State University, San Diego, California, USA

<sup>7</sup>San Diego State University/ University of California, San Diego Joint Doctoral Program in Clinical Psychology, San Diego, California, USA

<sup>8</sup>Université Paris Descartes, Assistance Publique-Hôpitaux de Paris, Paris, France

<sup>9</sup>Service de Médecine Interne, Hôpital Cochin, Paris, France

<sup>10</sup>Beryl & Richard Ivey Rheumatology Day Programs, St Joseph's Health Care, London, Ontario, Canada

<sup>11</sup>Lawson Health Research Institute, London, Ontario, Canada



1  
2  
3 <sup>12</sup>NVLE Dutch patient organization for systemic autoimmune diseases, Utrecht, The Netherlands

4  
5 <sup>13</sup>Department of Psychiatry, McGill University, Montréal, Québec, Canada

6  
7  
8 <sup>14</sup>Departments of Epidemiology, Biostatistics, and Occupational Health, McGill University,  
9  
10 Montréal, Québec, Canada

11  
12 <sup>15</sup>Department of Educational and Counselling Psychology, McGill University, Montréal,  
13  
14  
15 Québec, Canada

16  
17 <sup>16</sup>Department of Psychology, McGill University, Montréal, Québec, Canada

18  
19 <sup>17</sup>SPIN Investigators: Murray Baron, McGill University, Montreal, Quebec, Canada; Daniel E.  
20  
21 Furst, Division of Rheumatology, Geffen School of Medicine, University of California, Los  
22  
23 Angeles, California, USA; Karen Gottesman, Scleroderma Foundation, Los Angeles, California,  
24  
25 USA; Maureen D. Mayes, University of Texas McGovern School of Medicine, Houston, Texas,  
26  
27 USA; Robert Riggs, Scleroderma Foundation, Danvers, Massachusetts, USA; Maureen Sauve,  
28  
29 Scleroderma Society of Ontario, Hamilton, Ontario; Fredrick Wigley, Johns Hopkins University  
30  
31 School of Medicine, Baltimore, Maryland, USA; Shervin Assassi, University of Texas  
32  
33 McGovern School of Medicine, Houston, Texas, USA; Isabelle Boutron, Université Paris  
34  
35 Descartes, and Assistance Publique-Hôpitaux de Paris, Paris, France; Angela Costa Maia,  
36  
37 University of Minho, Braga, Portugal; Lindsay Cronin, Scleroderma Foundation, Western  
38  
39 Pennsylvania Chapter, Pittsburgh, Pennsylvania, USA; Ghassan El-Baalbaki, Université du  
40  
41 Québec à Montréal, Montreal, Quebec, Canada; Carolyn Ells, McGill University, Montreal,  
42  
43  
44  
45  
46  
47  
48  
49  
50  
51  
52  
53  
54  
55  
56  
57  
58  
59  
60  
Quebec, Canada; Stephen Elrod, Scleroderma Foundation, Southern California Chapter, Los

1  
2  
3 Angeles, California, USA; Cornelia van den Ende, Sint Maartenskliniek, Nijmegen, The  
4  
5  
6 Netherlands; Kim Fligelstone, Scleroderma & Raynaud's UK, London, UK; Catherine Fortune,  
7  
8  
9 Scleroderma Society of Ontario, Hamilton, Ontario, Canada; Tracy Frech, University of Utah,  
10  
11  
12 Salt Lake City, Utah, USA; Amy Gietzen, Scleroderma Foundation, Tri-State Chapter,  
13  
14  
15 Binghamton, New York, USA; Dominique Godard, Association des Sclérodermiques de France,  
16  
17  
18 Sorel-Moussel, France; Geneviève Guillot, Sclérodermie Québec, Montreal, Quebec, Canada;  
19  
20  
21 Daphna Harel, New York University, New York, New York, USA; Shirley Haslam, Scleroderma  
22  
23  
24 Society of Ontario, Hamilton, Ontario, Canada; Monique Hinchcliff, Yale School of Medicine,  
25  
26  
27 New Haven, Connecticut, USA; Marie Hudson, McGill University, Montreal, Quebec, Canada;  
28  
29  
30 Ann Impens, Midwestern University, Downers Grove, Illinois, USA; Yeona Jang, McGill  
31  
32  
33 University, Montreal, Quebec, Canada; Sindhu R. Johnson, Toronto Scleroderma Program,  
34  
35  
36 Mount Sinai Hospital, Toronto Western Hospital, and University of Toronto, Toronto, Ontario,  
37  
38  
39 Canada; Ann Tyrell Kennedy, Federation of European Scleroderma Associations, Dublin,  
40  
41  
42 Ireland; Annett Körner, McGill University, Montreal, Quebec, Canada; Maggie Larche,  
43  
44  
45 McMaster University, Hamilton, Ontario, Canada; Catarina Leite, University of Minho, Braga,  
46  
47  
48 Portugal; Carlo Marra, Memorial University, St. John's, Newfoundland, Canada; Christelle  
49  
50  
51 Nguyen, Université Paris Descartes, and Assistance Publique - Hôpitaux de Paris, Paris, France;  
52  
53  
54 Karen Nielsen, Scleroderma Society of Ontario, Hamilton, Ontario, Canada; Janet Pope,  
55  
56  
57 University of Western Ontario, London, Ontario, Canada; Alexandra Portales, Asociación  
58  
59  
60

1  
2  
3 Española de Esclerodermia, Madrid, Spain; Michelle Richard, Scleroderma Society of Nova  
4  
5  
6 Scotia, Halifax, Nova Scotia, Canada; Tatiana Sofia Rodriguez Reyna, Instituto Nacional de  
7  
8  
9 Ciencias Médicas y Nutrición Salvador Zubirán, Mexico City, Mexico; Ken Rozee, Scleroderma  
10  
11  
12 Society of Nova Scotia, Halifax, Nova Scotia, Canada; Anne A. Schouffoer, Leiden University  
13  
14  
15 Medical Center, Leiden, The Netherlands; Russell J. Steele, Jewish General Hospital and McGill  
16  
17  
18 University, Montreal, Quebec, Canada; Nancy Stephens, Scleroderma Foundation, Michigan  
19  
20  
21 Chapter, Southfield, Michigan, USA; Maria E. Suarez-Almazor, University of Texas MD  
22  
23  
24 Anderson Cancer Center, Houston, Texas, USA; Durhane Wong-Rieger, Canadian Organization  
25  
26  
27 for Rare Disorders, Toronto, Ontario, Canada; Christian Agard, Centre Hospitalier Universitaire  
28  
29  
30 - Hôtel-Dieu de Nantes, Nantes, France; Alexandra Albert, Université Laval, Quebec, Quebec,  
31  
32  
33 Canada; Marc André, Centre Hospitalier Universitaire Gabriel-Montpied, Clermont-Ferrand,  
34  
35  
36 France; Guylaine Arsenault, Université de Sherbrooke, Sherbrooke, Quebec, Canada; Ilham  
37  
38  
39 Benzidia, Assistance Publique - Hôpitaux de Paris, Hôpital St-Louis, Paris, France; Sabine  
40  
41  
42 Berthier, Centre Hospitalier Universitaire Dijon Bourgogne, Dijon, France; Lyne Bissonnette,  
43  
44  
45 Université de Sherbrooke, Sherbrooke, Quebec, Canada; Gilles Boire, Université de Sherbrooke,  
46  
47  
48 Sherbrooke, Quebec, Canada; Alessandra Bruns, Université de Sherbrooke, Sherbrooke, Quebec,  
49  
50  
51 Canada; Patricia Carreira, Servicio de Reumatología del Hospital 12 de Octubre, Madrid, Spain;  
52  
53  
54 Marion Casadevall, Assistance Publique - Hôpitaux de Paris, Hôpital Cochin, Paris, France;  
55  
56  
57 Benjamin Chaigne, Assistance Publique - Hôpitaux de Paris, Hôpital Cochin, Paris, France;  
58  
59  
60

1  
2  
3 Lorinda Chung, Stanford University, Stanford, California, USA; Pascal Cohen, Assistance  
4  
5  
6 Publique - Hôpitaux de Paris, Hôpital Cochin, Paris, France; Chase Correia, Northwestern  
7  
8  
9 University, Chicago, Illinois, USA; Pierre Dagenais, Université de Sherbrooke, Sherbrooke,  
10  
11  
12 Quebec, Canada; Christopher Denton, Royal Free London Hospital, London, UK; Robyn  
13  
14  
15 Domsic, University of Pittsburgh, Pittsburgh, Pennsylvania, USA; Sandrine Dubois, Centre  
16  
17  
18 Hospitalier Régional Universitaire de Lille, Hôpital Claude Huriez, Lille, France; James V.  
19  
20  
21 Dunne, St. Paul's Hospital and University of British Columbia, Vancouver, British Columbia,  
22  
23  
24 Canada; Bertrand Dunogue, Assistance Publique - Hôpitaux de Paris, Hôpital Cochin, Paris,  
25  
26  
27 France; Alexia Esquinca, Instituto Nacional de Ciencias Médicas y Nutrición Salvador Zubirán,  
28  
29  
30 Mexico City, Mexico; Regina Fare, Servicio de Reumatología del Hospital 12 de Octubre,  
31  
32  
33 Madrid, Spain; Dominique Farge-Bancel, Assistance Publique - Hôpitaux de Paris, Hôpital St-  
34  
35  
36 Louis, Paris, France; Paul R. Fortin, CHU de Québec - Université Laval, Québec, Québec,  
37  
38  
39 Canada; Anna Gill, Royal Free London Hospital, London, UK; Jessica Gordon, Hospital for  
40  
41  
42 Special Surgery, New York City, New York, USA; Brigitte Granel-Rey, Aix Marseille  
43  
44  
45 Université, and Assistance Publique - Hôpitaux de Marseille, Hôpital Nord, Marseille, France;  
46  
47  
48 Claire Grange, Centre Hospitalier Lyon Sud, Lyon, France; Genevieve Gyger, Jewish General  
49  
50  
51 Hospital and McGill University, Montreal, Québec, Canada; Eric Hachulla, Centre Hospitalier  
52  
53  
54 Régional Universitaire de Lille, Hôpital Claude Huriez, Lille, France; Pierre-Yves Hatron,  
55  
56  
57 Centre Hospitalier Régional Universitaire de Lille, Hôpital Claude Huriez, Lille, France; Ariane  
58  
59  
60

1  
2  
3 L Herrick, University of Manchester, Salford Royal NHS Foundation Trust, Manchester, UK;  
4  
5  
6 Adrian Hij, Assistance Publique - Hôpitaux de Paris, Hôpital St-Louis, Paris, France; Monique  
7  
8  
9 Hinchcliff, Northwestern University, Chicago, Illinois, USA; Alena Ikic, Université Laval,  
10  
11  
12 Quebec, Quebec, Canada; Niall Jones, University of Alberta, Edmonton, Alberta, Canada; Artur  
13  
14  
15 Jose de B. Fernandes, Université de Sherbrooke, Sherbrooke, Quebec, Canada; Suzanne Kafaja,  
16  
17  
18 University of California, Los Angeles, California, USA; Nader Khalidi, McMaster University,  
19  
20  
21 Hamilton, Ontario, Canada; Marc Lambert, Centre Hospitalier Régional Universitaire de Lille,  
22  
23  
24 Hôpital Claude Huriez, Lille, France; David Launay, Centre Hospitalier Régional Universitaire  
25  
26  
27 de Lille, Hôpital Claude Huriez, Lille, France; Patrick Liang, Université de Sherbrooke,  
28  
29  
30 Sherbrooke, Quebec, Canada; Hélène Maillard, Centre Hospitalier Régional Universitaire de  
31  
32  
33 Lille, Hôpital Claude Huriez, Lille, France; Nancy Maltez, University of Ottawa, Ottawa,  
34  
35  
36 Ontario, Canada; Joanne Manning, Salford Royal NHS Foundation Trust, Salford, UK; Isabelle  
37  
38  
39 Marie, CHU Rouen, Hôpital de Bois-Guillaume, Rouen, France; Maria Martin, Servicio de  
40  
41  
42 Reumatologia del Hospital 12 de Octubre, Madrid, Spain; Thierry Martin, Les Hôpitaux  
43  
44  
45 Universitaires de Strasbourg, Nouvel Hôpital Civil, Strasbourg, France; Ariel Masetto,  
46  
47  
48 Université de Sherbrooke, Sherbrooke, Quebec, Canada; François Maurier, Hôpitaux Privés de  
49  
50  
51 Metz, Hôpital Belle-Isle, Metz, France; Arsene Mekinian, Assistance Publique - Hôpitaux de  
52  
53  
54 Paris, Hôpital St-Antoine, Paris, France; Sheila Melchor, Servicio de Reumatologia del Hospital  
55  
56  
57 12 de Octubre, Madrid, Spain; Mandana Nikpour, St Vincent's Hospital and University of  
58  
59  
60

1  
2  
3 Melbourne, Melbourne, Victoria, Australia; Vincent Poindron, Les Hôpitaux Universitaires de  
4  
5  
6 Strasbourg, Nouvel Hôpital Civil, Strasbourg, France; Susanna Proudman, Royal Adelaide  
7  
8  
9 Hospital and University of Adelaide, Adelaide, South Australia, Australia; Alexis Régent,  
10  
11  
12 Assistance Publique - Hôpitaux de Paris, Hôpital Cochin, Paris, France; Sébastien Rivière,  
13  
14  
15 Assistance Publique - Hôpitaux de Paris, Hôpital St-Antoine, Paris, France; David Robinson,  
16  
17  
18 University of Manitoba, Winnipeg, Manitoba, Canada; Esther Rodriguez, Servicio de  
19  
20  
21 Reumatologia del Hospital 12 de Octubre, Madrid, Spain; Sophie Roux, Université de  
22  
23  
24 Sherbrooke, Sherbrooke, Quebec, Canada; Perrine Smets, Centre Hospitalier Universitaire  
25  
26  
27 Gabriel-Montpied, Clermont-Ferrand, France; Doug Smith, University of Ottawa, Ottawa,  
28  
29  
30 Ontario, Canada; Vincent Sobanski, Centre Hospitalier Régional Universitaire de Lille, Hôpital  
31  
32  
33 Claude Huriez, Lille, France; Robert Spiera, Hospital for Special Surgery, New York City, New  
34  
35  
36 York, USA; Virginia Steen, Georgetown University, Washington, DC, USA; Wendy Stevens, St  
37  
38  
39 Vincent's Hospital and University of Melbourne, Melbourne, Victoria, Australia; Evelyn Sutton,  
40  
41  
42 Dalhousie University, Halifax, Nova Scotia, Canada; Benjamin Terrier, Assistance Publique -  
43  
44  
45 Hôpitaux de Paris, Hôpital Cochin, Paris, France; Carter Thorne, Southlake Regional Health  
46  
47  
48 Centre, Newmarket, Ontario, Canada; John Varga, Northwestern University, Chicago, Illinois,  
49  
50  
51 USA; Pearce Wilcox, St. Paul's Hospital and University of British Columbia, Vancouver, British  
52  
53  
54 Columbia, Canada; Michelle Wilson, St Vincent's Hospital and University of Melbourne,  
55  
56  
57 Melbourne, Victoria, Australia;

1  
2  
3  
4  
5  
6 Kylene Anne Aguila, Jewish General Hospital, Montreal, Quebec, Canada; Mara Cañedo Ayala,  
7  
8  
9 Jewish General Hospital, Montreal, Quebec, Canada; Andrea Carboni-Jiménez, Jewish General  
10  
11  
12 Hospital, Montreal, Quebec, Canada; Claire Fedoruk, Jewish General Hospital, Montreal,  
13  
14  
15 Quebec, Canada; Shadi Gholizadeh, McGill University, Montreal, Quebec, Canada, and San  
16  
17  
18 Diego State University and University of California, San Diego, California, USA; Sami Harb,  
19  
20  
21 Jewish General Hospital, Montreal, Quebec, Canada; Lydia Tao, Jewish General Hospital,  
22  
23  
24 Montreal, Quebec, Canada; Kimberly Turner, Jewish General Hospital, Montreal, Quebec,  
25  
26  
27 Canada.

28  
29  
30  
31 **Address for Correspondence:** Brett D. Thombs, PhD; Jewish General Hospital; 4333 Côte-  
32  
33  
34 Sainte-Catherine Road; Montréal, Québec H3T 1E4; Tel: (514) 340-8222 ext. 25112; Email:  
35  
36  
37 brett.thombs@mcgill.ca

38  
39  
40  
41 **Word Count:** 3,520  
42  
43  
44  
45  
46  
47  
48  
49  
50  
51  
52  
53  
54  
55  
56  
57  
58  
59  
60

## ABSTRACT

**Objectives:** The Scleroderma Patient-centered Intervention Network (SPIN) Cohort utilizes the cohort multiple randomised controlled trial design to embed trials of online self-care interventions for people living with systemic sclerosis (SSc, scleroderma). To offer interventions to patients interested in using them, participants complete signalling items that query about the likelihood that patients would agree to participate in 9 different hypothetical online programs addressing common SSc-related problems. It is not known what factors influence patient-reported interest in participating in a particular online intervention and if intervention-specific signalling questions provide unique information or replicate broader characteristics, such as overall willingness to participate or self-efficacy. This study assessed factors that explain responses to intervention-specific signalling items.

**Design:** Cross-sectional survey.

**Setting:** SPIN Cohort participants enrolled at 42 centres from Canada, the United States, the United Kingdom, France, Spain, and Mexico who completed study questionnaires from March 2014 through January 2018 were included.

**Measures:** Demographic and disease characteristics, self-efficacy, and symptoms related to each specific intervention were completed in addition to signalling items. General likelihood of using interventions was calculating by taking the mean score of the remaining signalling questions.

**Participants:** 1,060 participants with complete baseline data were included in the analyses.

**Results:** For all individual signalling questions, controlling for other variables, the mean of the remaining signalling questions was the strongest predictor (standardized regression coefficient  $\beta$  from 0.61 (sleep) to 0.80 (self-management). Smaller, but statistically significant, associations were found with the symptom associated with the respective signalling question and with general



1  
2  
3 self-efficacy for 7 of 9 signalling questions.  
4

5 **Conclusions:** The main factor associated with patients' interest in participating in a disease-  
6  
7 specific online self-care intervention is their general interest in participating in online  
8  
9 interventions. Factors that may influence this general interest should be explored and taken into  
10  
11 consideration when inviting patients to try online interventions.  
12  
13

14  
15  
16  
17 **Keywords:** clinical trials; cmRCT; cohort multiple RCT; systemic sclerosis; scleroderma  
18  
19  
20  
21  
22  
23  
24  
25  
26  
27  
28  
29  
30  
31  
32  
33  
34  
35  
36  
37  
38  
39  
40  
41  
42  
43  
44  
45  
46  
47  
48  
49  
50  
51  
52  
53  
54  
55  
56  
57  
58  
59  
60

### STRENGTHS AND LIMITATIONS OF THIS STUDY

- This is the first study to evaluate factors associated with patients indicating likelihood of using specific online interventions as part of signalling questions sometimes used in the cohort multiple randomised controlled trial design.
- A large, international sample of patients with SSc was analysed.
- Factors examined included sociodemographic variables, general likelihood of using online interventions, and symptoms or problems that would be addressed by the specific intervention.
- The SPIN Cohort constitutes a convenience sample of SSc patients receiving treatment at a SPIN recruiting centre, and patients at these centres may differ from those in other settings.
- SSc patients in the SPIN Cohort complete questionnaires online, which may limit the generalizability of findings.

## INTRODUCTION

Well-designed and conducted randomised controlled trials (RCTs) provide the best mechanism for evaluating the benefits and harms of healthcare interventions.[1,2] Large-scale RCTs, however, are complex and expensive to conduct. Concerns have been raised that many RCTs have difficulty recruiting and enrolling patients, consent procedures do not reflect how patients make decisions in real clinical practice, long-term outcomes are often not available, many trials have limited real-world generalizability, and the infrastructure needed for individual trials is prohibitively expensive.[3-11]

In response to these concerns, new approaches to RCTs have been proposed, including trial designs that utilize routinely collected health data or create data sources to facilitate patient recruitment and outcome assessment.[4,12-16] One example is the cohort multiple RCT (cmRCT) design.[4] In the cmRCT design, researchers set up an ongoing observational cohort that is designed from inception to serve as a framework for conducting trials. Participants who enrol in the cohort complete outcome measurements at regular intervals. When a trial is conducted using the cohort, a random selection of patients eligible for the trial is contacted and offered access to the intervention being tested. Patients who are eligible but not selected are not notified that the trial is occurring and therefore receive usual care. Outcomes for the two groups are compared post-trial using the cohort's routine data collection procedures. In most examples of cmRCTs, prior to enrolment in the cohort, patients are informed and consent to the possibility that they may be participants in trials but would not be notified about the trial if they are assigned to usual care.[17-22]

Participants sometimes enrol in trials in order to receive a new intervention that would not be available to them as part of their usual care. In conventional trial designs in which participants

1  
2  
3 consent to randomisation to a specific intervention or usual care, this may lead to withdrawal  
4 from the trial or disappointment bias reflected in patient-reported outcomes.[1,4] In order to  
5 reduce this possibility, in the cmRCT design, cohort participants are not notified about specific  
6 trials being planned or conducted, except when they are offered access to an intervention as part  
7 of a trial. A potential problem with this approach is that a substantial number of patients offered  
8 an intervention that is undergoing testing may not accept it, since they did not enrol in the cohort  
9 with any expectation that it would be offered to them. This would dilute intervention effects  
10 estimated on an intention-to-treat basis, potentially substantially if the rate of accepted offers is  
11 low, as the intervention arm then includes a large proportion of patients receiving care as  
12 usual.[23] A possible solution that has been suggested to reduce non-acceptance of intervention  
13 offers is to present cohort patients with a list of possible interventions as part of regular cohort  
14 data collection and ask if they would agree to use them if offered.[4] Using this as a criteria for  
15 eligibility to participate in the trial is thought to increase the likelihood of accepting an  
16 intervention offer without disclosing the actual intervention that will be offered.  
17  
18  
19  
20  
21  
22  
23  
24  
25  
26  
27  
28  
29  
30  
31  
32  
33  
34

35 Systemic sclerosis (SSc), also known as scleroderma, is a rare autoimmune connective  
36 tissue disease characterized by vascular injury, immune dysfunction and an abnormal fibrotic  
37 process that can affect multiple organ systems including the skin, lungs, gastrointestinal tract and  
38 cardiovascular system.[24,25] SSc is notable for the range of problems faced by people living  
39 with the disease, including limitations in physical mobility and hand function, pain, fatigue, sleep  
40 disturbance, depression, sexual dysfunction, and body image distress from disfiguring changes in  
41 appearance.[17,26-28] The Scleroderma Patient-centered Intervention Network (SPIN) was  
42 formed to develop, test, and disseminate interventions to improve the health and quality of life of  
43 patients with SSc, and to serve as a model for doing this in other rare diseases. To do this, SPIN  
44  
45  
46  
47  
48  
49  
50  
51  
52  
53  
54  
55  
56  
57  
58  
59  
60

1  
2  
3 utilizes the cmRCT design and maintains a large international cohort used to collect information  
4 about problems important to patients and as a framework for RCTs of internet-based  
5  
6 rehabilitation, education, self-management, and psychological interventions.[17]  
7  
8  
9

10 As part of routine data collection via the SPIN Cohort, SPIN administers a series of  
11 signalling items that query about patients' self-reported likelihood of using 9 different online  
12 programs that would address problems common in SSc, including fatigue, hand function and  
13 mobility, sleep difficulty, emotions and stress, concerns about body image and appearance, pain,  
14 low self-efficacy for managing different problems common in scleroderma, nutrition and diet,  
15 and difficulty exercising. It is not clear, however, what factors are associated with patient-  
16 reported likelihood of using interventions and whether responses reflect a general willingness to  
17 use online interventions versus the desire to address specific problems or symptoms. The  
18 objective of this study was to identify characteristics of SPIN Cohort participants associated with  
19 a greater reported likelihood that they would agree to use an online intervention if it were offered  
20 through SPIN, including sociodemographic characteristics, disease characteristics, a general  
21 willingness to use online interventions, and symptoms or problems that would be presumed to be  
22 addressed by each specific intervention.  
23  
24  
25  
26  
27  
28  
29  
30  
31  
32  
33  
34  
35  
36  
37  
38  
39

## 40 **PATIENTS AND METHODS**

### 41 **Patients and Procedure**

42 The study sample consisted of participants enrolled in the SPIN Cohort [17] who  
43 completed study questionnaires from March 2014 through January 2018. Patients were enrolled  
44 at 42 centres from Canada, the United States, the United Kingdom, France, Spain, and Mexico.  
45 To be eligible for the SPIN Cohort, participants must be classified as having SSc according to  
46 2013 ACR/EULAR criteria,[29] be  $\geq 18$  years of age, be fluent in English, French, or Spanish,  
47  
48  
49  
50  
51  
52  
53  
54  
55  
56  
57  
58  
59  
60

1  
2  
3 and be able to respond to questionnaires via the Internet. The SPIN sample is a convenience  
4 sample. Eligible participants are invited by attending physicians or supervised nurse coordinators  
5 from SPIN centres to participate, and written informed consent is obtained. The local SPIN  
6 investigator provides medical data, which triggers an email invitation to participants with  
7 instructions for activating their SPIN account and completing SPIN Cohort measures online.  
8 Participants complete outcome measures upon enrolment and subsequently every 3 months.  
9  
10 Participants with limited or diffuse SSc who completed all study variables at baseline were  
11 included in the present study. The SPIN Cohort study was approved by the Research Ethics  
12 Committee of the Jewish General Hospital, Montréal, Canada and by the research ethics  
13 committees of each participating centre.  
14  
15  
16  
17  
18  
19  
20  
21  
22  
23  
24  
25

## 26 **Measures**

27  
28 *Sociodemographic and Medical Data.* Patients provided demographic data, including age, sex  
29 and years of education. SPIN recruiting physicians provided medical data, including time since  
30 first non-Raynaud's phenomenon symptoms, onset of Raynaud's phenomenon, and SSc  
31 diagnosis; SSc subtype (limited or diffuse cutaneous SSc);[30] and modified Rodnan Skin  
32 Score.[31]  
33  
34  
35  
36  
37  
38  
39

40 *Signalling Items.* Nine signalling items were developed specifically for use in the SPIN  
41 Cohort to assess the self-reported likelihood that Cohort participants would agree to use online  
42 programs designed to address one of nine problems related to living with scleroderma, including  
43 fatigue, hand function and mobility, sleep problems, emotions and stress, concerns about body  
44 image and appearance, pain, low self-efficacy for disease management, nutrition/diet, and  
45 exercise. Each item (*"Please indicate how likely you would be to participate in an online*  
46  
47  
48  
49  
50  
51  
52  
53  
54  
55  
56  
57  
58  
59  
60

1  
2  
3 *program that addresses [...]"*) is rated on a numerical scale ranging from 0 (*not likely at all*) to  
4  
5 10 (*very likely*).

6  
7  
8 *Self-Efficacy to Manage Chronic Disease Scale (SEMCD)*. The 6-item SEMCD Scale  
9  
10 measures confidence in one's ability to manage fatigue, pain, emotional distress and other  
11  
12 symptoms as well as to reduce the need for medical care and reliance on medications.[32]  
13  
14 Respondents are asked to rate their current confidence in their ability to perform certain tasks  
15  
16 regularly. Each item is rated on a 10-point rating scale ranging from 1 (*not confident at all*) to 10  
17  
18 (*totally confident*). The score for the scale is the mean of all items, with higher scores reflecting  
19  
20 greater self-efficacy. The SEMCD scale has been validated in patients with SSc.[33]  
21  
22

23  
24 *Patient-Reported Outcomes Measurement Information System-29 (PROMIS-29v2)*. The  
25  
26 PROMIS-29 profile version 2.0 (PROMIS-29v2) [34] measures patient-reported health status  
27  
28 over the past 7 days, with 4 items for each of 7 domains (physical function, anxiety, depression,  
29  
30 fatigue, sleep disturbance, ability to participate in social roles and activities, pain interference)  
31  
32 plus a single pain intensity item. Items are scored on a 5-point scale (range 1-5), with different  
33  
34 response options for different domains. The single pain intensity item is measured on an 11-point  
35  
36 rating scale (0 = *no pain*, 11= *worst imaginable pain*). Higher scores represent more of the  
37  
38 domain being measured; that is, better physical function and ability to participate in social roles  
39  
40 and activities, but higher levels of anxiety, depression, fatigue, sleep disturbance, pain  
41  
42 interference, and pain intensity. Raw domain scores are obtained by summing item scores for  
43  
44 each domain, which are converted into T-scores standardized for the general US population  
45  
46 (mean=50, standard deviation [SD]=10). The PROMIS-29v2 has been validated in patients with  
47  
48 SSc.[35]  
49  
50  
51  
52

53  
54 *Cochin Hand Function scale (CHFS)*. The 18-item CHFS [36,37] measures the ability to  
55  
56  
57  
58  
59  
60

1  
2  
3 perform daily hand-related activities. Items are scored on a scale from 0 (*yes, without difficulty*)  
4 to 5 (*impossible*) and are grouped into five content categories: kitchen, dressing oneself, hygiene,  
5 the office, and other. Total scores range from 0 to 90, and higher scores indicate more hand  
6 disability. The CHFS has been validated in SSc.[37]  
7  
8  
9

10  
11  
12 *Social Appearance Anxiety Scale (SAAS)*. The SAAS is a 16-item measure examining  
13 fear of situations in which one's appearance will be evaluated.[38] Response options range from  
14 1 (*not at all*) to 5 (*extremely*). To calculate a total score, the first item is reverse coded and then  
15 all items are summed. Total scores range from 16 to 80, with higher scores indicating greater  
16 fear. The SAAS has been validated in SSc.[39]  
17  
18  
19

20  
21  
22 *Interference from gastrointestinal problems*. Interference with daily activities from  
23 gastrointestinal problems was assessed using an 11-point numerical rating scale (range 0-10),  
24 with higher scores indicating more limitations.  
25  
26  
27  
28  
29

30  
31 *Physical activity*. Physical activity was assessed using a single item "*Compared to other*  
32 *people your age, how would you rate your physical activity during the past year?*". Response  
33 options ranged from 1 (*physically inactive*) to 5 (*very active*).  
34  
35  
36  
37

## 38 **Statistical Analyses**

39  
40 Descriptive statistics were used to calculate the mean and standard deviation (SD) for  
41 each signalling item. Pearson correlations between signalling question scores were calculated. To  
42 assess factors associated with self-reported likelihood of participating in an online program, we  
43 conducted multiple linear regression analysis for each signalling question and entered sets of  
44 variables hierarchically. Independent variables included in the regression models were  
45 determined a-priori, and included: (a) demographic and disease characteristics including age,  
46 sex, disease duration (time since onset of first non-Raynaud symptom), modified Rodnan Skin  
47  
48  
49  
50  
51  
52  
53  
54  
55  
56  
57  
58  
59  
60



1  
2  
3 Score, years of education; (b) general likelihood of using online interventions, calculating by  
4 taking the mean score of the remaining signalling questions; (c) self-efficacy to manage chronic  
5 disease; and (d) the symptom or problem corresponding with the intervention in each signalling  
6 item. The intervention-specific symptoms or problems were measured with the relevant  
7 PROMIS-29 domains for fatigue, sleep, depression, and pain signalling items; physical activity  
8 for the exercise signalling item on exercise, CHFS for the hand function signalling item, the  
9 SAAS for the body image signalling item, and a single-item numerical rating scale item on  
10 intestinal problems for the nutrition and diet signalling item. Standardized regression coefficients  
11 beta ( $\beta$ ) are reported, as well as the total explained variance for each model ( $R^2$ ).  
12  
13  
14  
15  
16  
17  
18  
19  
20  
21  
22  
23

24 In addition to the main regression model, based on our findings, we conducted  
25 hierarchical regression models to quantify the amount of additional variance explained by the  
26 mean score of the remaining signalling questions and the intervention-specific symptom or  
27 problem variable. In these models, in step 1, the demographic and disease characteristics, and  
28 self-efficacy to manage chronic disease were included as independent variables. In step 2, the  
29 mean score of the remaining signalling questions was added and the magnitude of the change in  
30  $R^2$  was examined. In step 3, the symptom or problem corresponding with the intervention in each  
31 signalling item was added.  
32  
33  
34  
35  
36  
37  
38  
39  
40  
41

42 The assumption of normal distribution of residuals in the regression model was tested  
43 using a normal probability plot. Additionally, correlations between independent variables and  
44 tolerances were calculated to check for multicollinearity. Linearity of the model was assessed  
45 using partial residual plot. All analyses were conducted using Stata version 14.2 (StataCorp,  
46 College Station, TX, USA).  
47  
48  
49  
50  
51  
52

### 53 **Patient and Public Involvement**

54  
55  
56  
57  
58  
59  
60

1  
2  
3 Since SPIN was conceived, SPIN Patient Advisory Board members have been involved  
4 in all stages of SPIN's research (<https://www.spinsclero.com/en/Team?teamID=f120d6a6-8bee-62ed-b515-ff0000ce1efe>). They have engaged in projects that have helped to better understand  
7 important problems faced by people with SSc [e.g., 17, 27, 28], to prioritize educational,  
10 psychosocial, and rehabilitation tools to address these problems and to evaluate how best to  
12 develop, test, and deliver interventions in a rare disease context [e.g., 17, 40]. Members of the  
14 SPIN Patient Advisory Board initially participated in the selection of topics to include in the  
16 SPIN Cohort assessments including the development of signalling items to include. Team  
18 members provided input on the use of the cmRCT design and were involved in decisions related  
20 to which international scleroderma treatment centres to approach for enrolment of patients.  
24

## 25 **RESULTS**

### 26 **Sample Characteristics**

27  
28  
29 Of 1,704 participants with submitted baseline self-report data, n=228 had no data for the  
31 SAAS, as SPIN stopped collecting data for this measure in English-speaking Cohort participants  
32 after November 7, 2016. Of the 1,476 eligible participants, there were 416 (28.2%) missing one  
33 or more variables. A commonly missing value was the time since the onset of the first non-  
34 Raynaud's symptom (n=103). The remaining patients (n=313) were missing one or more  
35 demographic or patient-reported outcome measures (i.e., signalling or symptom measures).  
36  
37  
38  
39

40  
41  
42 In total, 1,060 participants had complete data for all variables and were included in  
43 regression analyses, including 128 men (12%) and 932 women (88%; Table 1). Most patients  
44 (71%) were married or living as married. Mean time since Raynaud's onset was 14.6 (SD=11.6)  
45 years; mean time since first non-Raynaud's symptoms was 11.3 (SD=8.5) years; mean time since  
46 diagnosis was 9.4 (SD=7.8) years. The mean signalling question scores ranged from 5.1 (body  
47  
48  
49  
50  
51  
52  
53  
54  
55  
56  
57  
58  
59  
60

1  
2  
3 image) to 7.0 (exercise). Response frequencies for signalling items are shown in Appendix Table  
4  
5 A. Responses for each signaling question were skewed towards willingness to participate, with  
6  
7 score 10 (very likely to participate) being most frequently given for all 9 items (range 22-36%).  
8  
9  
10 As shown in Table 2, correlations between signalling question scores ranged from 0.43 (sleep  
11  
12 problems with exercise) to 0.71 (body image with emotions and stress).  
13

### 14 **Correlates of Signalling Items**

15  
16  
17 Results from the multiple linear regression analyses are shown in Table 3.  $R^2$  for the  
18  
19 models ranged from 0.46 (exercise) to 0.64 (self-management). In all models, controlling for  
20  
21 other variables, the mean of the remaining signalling questions was most strongly associated  
22  
23 with a greater likelihood to participate in an intervention, with standardized regression  
24  
25 coefficients ranging from  $\beta = 0.61$  (sleep) to  $\beta = 0.80$  (self-management). The symptom or  
26  
27 problem corresponding with the respective signalling question was significantly associated with  
28  
29 higher scores on 7 of the 9 the signalling questions: fatigue ( $\beta = 0.30$ ,  $p < 0.001$ ), hand ( $\beta = 0.21$ ,  
30  
31  $p < 0.001$ ), sleep ( $\beta = 0.43$ ,  $p < 0.001$ ), emotions and stress ( $\beta = 0.18$ ,  $p < 0.001$ ), body image ( $\beta$   
32  
33  $= 0.28$ ,  $p < 0.001$ ), pain ( $\beta = 0.32$ ,  $p < 0.001$ ), and nutrition/diet ( $\beta = 0.07$ ,  $p = 0.004$ ). For the  
34  
35 remaining two signalling questions, self-efficacy was not statistically associated with reported  
36  
37 likelihood of participating in a self-management program ( $\beta = -0.03$ ,  $p = 0.124$ ), and physical  
38  
39 activity level was not associated with the exercise intervention signalling question ( $\beta = -0.04$ ,  $p =$   
40  
41 0.130). Higher self-efficacy was significantly associated with higher scores on the signalling  
42  
43 questions for 7 items, including fatigue ( $\beta = 0.10$ ,  $p < 0.001$ ), hand ( $\beta = 0.11$ ,  $p < 0.001$ ), sleep ( $\beta$   
44  
45  $= 0.13$ ,  $p < 0.001$ ), body image ( $\beta = 0.09$ ,  $p < 0.001$ ), pain ( $\beta = 0.04$ ,  $p = 0.047$ ), nutrition/diet ( $\beta$   
46  
47  $= 0.09$ ,  $p < 0.001$ ), and exercise ( $\beta = 0.16$ ,  $p < 0.001$ ), but not for emotions and stress ( $\beta = 0.03$ ,  $p$   
48  
49  $= 0.131$ ) or self-management ( $\beta = -0.03$ ,  $p = 0.124$ ). Finally, there were 6 sociodemographic and  
50  
51  
52  
53  
54  
55  
56  
57  
58  
59  
60

1  
2  
3 disease variables included in each regression; between 0 and 2 were significantly associated with  
4 signalling question scores, but  $\beta \leq 0.08$  in all cases. Unstandardized regression coefficients (B)  
5 and their 95% confidence intervals from the multivariate linear regression analyses are shown in  
6  
7  
8  
9  
10 Appendix Tables B1-B9.

11  
12 In the hierarchical analyses, R<sup>2</sup>-change was assessed for all 9 models separately  
13 (Appendix Tables B1-B9). The amount of additional variance explained by adding the mean of  
14 the other signalling items to the model ranged from 0.41 (hand function problems) to 0.60 (self-  
15 management). The amount of additional variance explained by adding the symptom or problem  
16 corresponding with the signalling item ranged from <0.01 (exercise) to 0.14 (sleep).  
17  
18  
19  
20  
21  
22  
23

24 Regression diagnostics found no evidence for deviation from the assumption of normal  
25 distribution of residuals for any of the regression models based on a normal probability plot. All  
26 tolerance values were between 0.56 and 0.97, indicating that multicollinearity was not an issue  
27 for any of the regression models. Partial residual plots did not show any violation of the linearity  
28 assumption for any of the regression models.  
29  
30  
31  
32  
33  
34

## 35 **DISCUSSION**

36  
37 The main finding of this study was that the most important factor influencing patient-  
38 reported interest in using disease-specific online self-care interventions is general interest in  
39 using online interventions, which explained a substantial amount of additional variance for each  
40 model, ranging from 43% to 60%. The symptom or problem corresponding with the respective  
41 signalling question and higher self-efficacy was significantly associated with higher scores on 7  
42 of the 9 the signalling questions, but added between < 1% and 14% of additional explained  
43  
44  
45  
46  
47  
48  
49  
50  
51  
52  
53  
54  
55  
56  
57  
58  
59  
60 variance.

1  
2  
3 Results from our study suggest that there is a generic factor determining interest in  
4 participation in online self-care interventions. Across settings, it has been shown that the  
5 intention to use technology and the uptake and implementation of technological innovations in  
6 practice are mainly predicted by general factors, including the perceived usefulness, the  
7 perceived ease of use, experience, and greater technology confidence.[41-43] Identifying if these  
8 underlying factors are indeed driving the general interest in our sample of SSc patients could be  
9 useful, as these factors could then be taken into consideration in future trials when patients are  
10 invited to try novel online interventions in SPIN's research context or in other research  
11 programs.  
12  
13  
14  
15  
16  
17  
18  
19  
20  
21  
22  
23

24 To reduce non-acceptance of intervention offers in the cmRCT design, it has been  
25 suggested that cohort participants can be presented with a list of possible interventions as part of  
26 regular cohort data collection and asked if they would agree to use them if offered.[4] It has been  
27 hypothesized that this process would identify the potential accepters in advance and  
28 consequently reduce dilution of the intervention effects. The results of our study suggest that  
29 such a signalling question may not need to be intervention-specific, as a higher general interest in  
30 interventions was the main factor associated with higher scores on all signalling items.  
31  
32  
33  
34  
35  
36  
37  
38  
39

40 Identifying factors associated with responses, however, cannot predict actual use of  
41 interventions. Recently, the suggested process of including patients with a high indicated interest  
42 on the cohort's signalling item was applied in the SPIN-HAND feasibility trial, which was  
43 conducted via the SPIN Cohort. SPIN-HAND is an online hand exercise program to improve  
44 hand function for SSc patients. SPIN Cohort participants with at least mild hand function  
45 limitations (CHFS  $\geq 3$ ) and an indicated interest in using an online hand-exercise intervention  
46 (hand signalling question  $\geq 7$ ) were randomised to be offered to use the SPIN-HAND program or  
47  
48  
49  
50  
51  
52  
53  
54  
55  
56  
57  
58  
59  
60

1  
2  
3 usual care for 3 months. Of the 40 SPIN Cohort participants that were included in the SPIN-  
4 HAND feasibility trial, 24 were allocated to the intervention arm, and 16 to the control group.  
5  
6 Patients in the intervention arm were offered to try the SPIN-HAND program and, afterwards, to  
7  
8 participate in an interview collecting their feedback. In total, 15 of 24 (62.5%) patients consented  
9  
10 to use the SPIN-HAND intervention.[43] Thus, uptake of the offer to try the intervention was  
11  
12 low despite selecting patients based on their indicated interest. This result raises important  
13  
14 questions about using signalling items as an eligibility criterion for participation in RCTs  
15  
16 conducted using the cmRCT design, and it needs to be carefully evaluated how effective these  
17  
18 items are at identifying potential accepters of interventions in advance. Since the SPIN-HAND  
19  
20 feasibility trial with its small sample size provides only preliminary evidence, additional RCTs  
21  
22 using the cmRCT design with larger samples are necessary to confirm this finding.  
23  
24  
25  
26  
27

28  
29 The present study has limitations that should be considered in interpreting its results.  
30  
31 First, the SPIN Cohort constitutes a convenience sample of SSc patients receiving treatment at a  
32  
33 SPIN recruiting centre, and patients at these centres may differ from those in other settings.  
34  
35 Additionally, SSc patients in the SPIN Cohort complete questionnaires online, which may further  
36  
37 limit the generalizability of findings, as all participants already have Internet access and are  
38  
39 comfortable using it in a research setting. Third, 28% of the enrolled patients were excluded  
40  
41 from the analyses due to missing data. Fourth, the SPIN interventions under development to be  
42  
43 tested through the Cohort are all online self-care programs, and this is reflected in the signalling  
44  
45 questions that query about these online interventions. Based on our data, however, is not possible  
46  
47 to distinguish whether patients respond to the signalling items based on their interest in the  
48  
49 content of the proposed programs (e.g., their interest in self-management or non-pharmacological  
50  
51 treatments), or whether the online nature of the program drive their responses. Finally, this study  
52  
53  
54  
55  
56  
57  
58  
59  
60

1  
2  
3 explored an indicated interest (intention) in potentially trying an online intervention, but not the  
4  
5 patients' actual participation in an intervention when it was offered to them. It remains to be  
6  
7 elucidated to what degree these signalling questions may reflect actual acceptance of the offer  
8  
9 when participants are invited to participate in an intervention. Recent experiences with the SPIN-  
10  
11 HAND feasibility trial indicate that the predictive value of these questions may be lower than  
12  
13 anticipated.  
14  
15

16  
17 In sum, findings of the present study suggest that the main factor influencing patients'  
18  
19 interest in participating in a disease-specific online self-care intervention is their general interest  
20  
21 in participating in these types of interventions. It should be further explored what factors may  
22  
23 drive this general interest, as these factors may be taken into consideration when inviting patients  
24  
25 to try novel (online) interventions in a research context.  
26  
27  
28  
29  
30  
31  
32  
33  
34  
35  
36  
37  
38  
39  
40  
41  
42  
43  
44  
45  
46  
47  
48  
49  
50  
51  
52  
53  
54  
55  
56  
57  
58  
59  
60

## **AUTHORS' CONTRIBUTIONS**

LK and BDT were responsible for the study conception. LM and the SPIN Investigators contributed to data collection. LK, JC, MEC, FR, SJB, VLM, LM, WRN, JW and BDT contributed to data analysis and interpretation. LK, JC and BDT contributed to drafting the manuscript. All authors provided a critical revision of the manuscript and approved the final version of the manuscript. BDT is the guarantor.

## **FUNDING STATEMENT**

SPIN has been funded by grants from the Canadian Institutes of Health Research (TR3-119192, PJT-148504, PJT-149073), the Canadian Initiative for Outcomes in Rheumatology Care, and the Arthritis Society. In addition, SPIN has received institutional contributions from the Lady Davis Institute for Medical Research of the Jewish General Hospital, Montreal, Canada and from McGill University, Montreal, Canada. SPIN has also received support from Scleroderma Canada, the Scleroderma Society of Ontario, Sclérodermie Québec, the Scleroderma Society of Nova Scotia, the Scleroderma Association of British Columbia, Scleroderma Manitoba, and the Scleroderma Society of Saskatchewan. Dr. Thombs was supported by a Fonds de Recherche Québec - Santé researcher awards outside of the present work.

## **COMPETING INTERESTS STATEMENT**

The authors have read and understood the BMJ policy on declaration of interests and declare that they have no competing interests.

## **DATA SHARING STATEMENT**



1  
2  
3 Data used in the present study and other SPIN data can be requested via the  
4  
5 corresponding author. All requests to use SPIN data will be evaluated per the SPIN Data Sharing  
6  
7 and Publication Policy.  
8  
9  
10  
11  
12  
13  
14  
15  
16  
17  
18  
19  
20  
21  
22  
23  
24  
25  
26  
27  
28  
29  
30  
31  
32  
33  
34  
35  
36  
37  
38  
39  
40  
41  
42  
43  
44  
45  
46  
47  
48  
49  
50  
51  
52  
53  
54  
55  
56  
57  
58  
59  
60

For peer review only

**REFERENCES**

1. Torgerson DJ, Torgerson CJ. Designing randomised trials in health, education and the social sciences: an introduction. Basingstoke: Palgrave Macmillan; 2008.
2. Evans I, Thornton H, Chalmers I, et al. Testing Treatments: Better research for better healthcare. London: Pinter and Martin Ltd; 2011.
3. McDonald AM, Knight RC, Campbell MK, et al. What influences recruitment to randomized controlled trials? A review of trials funded by two UK funding agencies. *Trials* 2006;7:9.
4. Relton C, Torgerson D, O’Cathain A, et al. Rethinking pragmatic randomised controlled trials: introducing the “cohort multiple randomised controlled trial” design. *BMJ* 2010;340:2.
5. Treweek S, Mitchell E, Pitkethly M, et al. Strategies to improve recruitment to randomised controlled trials. *Cochrane Database Syst Rev* 2010;4:MRMR000013.
6. Watson J, Torgerson D. Increasing recruitment to randomised trials: a review of randomised controlled trials. *BMC Med Res Methodol* 2006;6:34.
7. Campbell M, Snowdon C, Francis D, et al. Recruitment to randomised trials: strategies for trial enrolment and participation study: the STEPS study. *Health Technol Assess* 2007;11:48 iii, ix-105.
8. Treweek S, Lockhart P, Pitkethly M, et al. Methods to improve recruitment to randomised controlled trials: Cochrane systematic review and meta-analysis. *BMJ Open* 2013;3:e002360.

- 1  
2  
3 9. Sully BG, Julious SA, Nicholl J. A reinvestigation of recruitment to randomised,  
4 controlled, multicenter trials: a review of trials funded by two UK funding agencies. *Trials*  
5 2013;14:166.  
6  
7
- 8  
9  
10 10. McDonald AM, Treweek S, Shakur H, et al. Using a business model approach and  
11 marketing techniques for recruitment to clinical trials. *Trials* 2011;12:74.  
12  
13
- 14  
15 11. Donovan JL, Paramasivan S, De Salis I, et al. Clear obstacles and hidden challenges:  
16 understanding recruiter perspectives in six pragmatic randomised controlled trials. *Trials*  
17 2014;15:5.  
18  
19
- 20  
21 12. Mc Cord KA, Al-Shahi Salman R, Treweek S, Gardner H, Strech D, Whiteley W, et al.  
22 Routinely collected data for randomized trials: promises, barriers, and implications. *Trials*  
23 2018;19:29.  
24  
25
- 26  
27  
28 13. James S, Fröbert O, Lagerqvist B. Cardiovascular registries: a novel platform for  
29 randomised clinical trials. *Heart* 2012;98:1329-31.  
30  
31
- 32  
33 14. James S, Rao SV, Granger CB. Registry-based randomized clinical trials-a new clinical  
34 trial paradigm. *Nat Rev Cardiol* 2015;12:312-6.  
35  
36
- 37  
38 15. van Staa TP, Dyson L, McCann G, Padmanabhan S, Belatri R, Goldacre B, et al. The  
39 opportunities and challenges of pragmatic point-of-care randomised trials using routinely  
40 collected electronic records: evaluations of two exemplar trials. *Health Technol Assess*  
41 2014;18:1-146.  
42  
43
- 44  
45  
46 16. Anderson GL, Burns CJ, Larsen J, Shaw PA. Use of administrative data to increase the  
47 practicality of clinical trials: Insights from the Women's Health Initiative. *Clin Trials*  
48 2016;13:519-26.  
49  
50  
51  
52  
53  
54  
55  
56  
57  
58  
59  
60

- 1  
2  
3 17. Kwakkenbos L, Jewett LR, Baron M, Bartlett SJ, Furst D, Gottesman K, et al. The  
4  
5 Scleroderma Patient-centered Intervention Network (SPIN) Cohort: Protocol for a cohort  
6  
7 multiple randomized controlled trial (cmRCT) design to support trials of psychosocial and  
8  
9 rehabilitation interventions in a rare disease context. *BMJ Open* 2013;3:e003563.  
10  
11
- 12 18. Young-Afat DA, van Gils CH, van den Bongard DHJG, Verkooijen HM, UMBRELLA  
13  
14 Study Group. The Utrecht Cohort for Multiple BREast Cancer Intervention Studies and  
15  
16 Long-Term evaLuAtion (UMBRELLA): objectives, design, and baseline results. *Breast*  
17  
18 *Cancer Res Treat* 2017;164:445–50.  
19  
20
- 21 19. Gal R, Monninkhof EM, Groenwold RHH, van Gils CH, van den Bongard DHJG, Peeters  
22  
23 PHM, et al. The effects of exercise on the quality of life of patients with breast cancer (the  
24  
25 UMBRELLA Fit study): study protocol for a randomized controlled trial. *Trials*.  
26  
27 2017;18:504.  
28  
29
- 30 20. Van der Velden JM, Verkooijen HM, Seravalli E, Hes J, Gerlich AS, Kasperts N, et al.  
31  
32 Comparing conVENTional RadioTherapy with stereotactIC body radiotherapy in patients  
33  
34 with spinAL metastases: study protocol for an randomized controlled trial following the  
35  
36 cohort multiple randomized controlled trial design. *BMC Cancer*. 2016;16:909.  
37  
38
- 39 21. Burbach JP, Verkooijen HM, Intven M, Kleijnen JP, Bosman ME, Raaymakers BW, et al.  
40  
41 RandomizEd Controlled Trial for Pre-operAtive Dose-escaLation BOOST in Locally  
42  
43 Advanced Rectal Cancer (RECTAL BOOST Study): study protocol for a randomized  
44  
45 controlled trial. *Trials* 2015;16:58.  
46  
47  
48
- 49 22. Couwenberg, AM, Burbach MJP, Smits AB, van Vulpen M, van Grevenstein WM,  
50  
51 Noordzij PG, et al. The Impact of Retractor SPONGE-Assisted Laparoscopic Surgery on  
52  
53 Duration of Hospital Stay and Postoperative Complications in Patients with Colorectal  
54  
55  
56  
57  
58  
59

- 1  
2  
3 Cancer (SPONGE Trial): study protocol for a randomized controlled  
4 trial. *Trials* 2016;17:132.  
5  
6  
7  
8 23. Candlish J, Pate A, Sperrin M, van Staa T; GetReal Work Package 2. Evaluation of biases  
9 present in the cohort multiple randomised controlled trial design: a simulation study. *BMC*  
10 *Med Res Methodol.* 2017 Jan 31;17(1):17  
11  
12  
13  
14 24. Seibold J. Scleroderma. In Harris ED, Budd RC, Firestein GS, et al. (Eds.). *Kelley's*  
15 *Textbook of Rheumatology*. Philadelphia, Elsevier, 2005:1279-308.  
16  
17  
18 25. Wigley FM, Hummers LK. Clinical features of systemic sclerosis. In Hochberg MC,  
19 Silman AJ, Smolen JS, et al. (Eds.): *Rheumatology*. Philadelphia, Mosby, 2003:1463-80.  
20  
21  
22 26. Kwakkenbos L, Delisle VC, Fox RS, et al. Psychosocial aspects of scleroderma. *Rheum*  
23 *Dis Clin North Am* 2015;41:519-28.  
24  
25  
26  
27 27. Thombs BD, van Lankveld W, Bassel M, et al. Psychological health and well-being in  
28 systemic sclerosis: state of the science and consensus research agenda. *Arthritis Care Res*  
29 2010;62:1181-9.  
30  
31  
32  
33 28. Bassel M, Hudson M, Taillefer SS, et al. Frequency and impact of symptoms experienced  
34 by patients with systemic sclerosis: results from a Canadian National Survey.  
35 *Rheumatology* 2011;50:762-7.  
36  
37  
38  
39 29. van den Hoogen F, Khanna D, Fransen J, Johnson SR, Baron M, Tyndall A, et al. 2013  
40 Classification criteria for systemic sclerosis: An American College of  
41 Rheumatology/European League Against Rheumatism collaborative initiative. *Arthritis*  
42 *Rheum* 2013;65:2737-47.  
43  
44  
45  
46  
47  
48  
49  
50  
51  
52  
53  
54  
55  
56  
57  
58  
59  
60

- 1  
2  
3 30. LeRoy EC, Black C, Fleischmajer R, Jablonska S, Krieg T, Medsger TA Jr, et al.  
4  
5 Scleroderma (systemic sclerosis): Classification, subsets and pathogenesis. *J Rheumatol*  
6  
7 1988;15:202-5.  
8  
9  
10 31. Clements P, Lachenbruch P, Siebold J, White B, Weiner S, Martin R, et al. Inter and  
11  
12 intraobserver variability of total skin thickness score (modified Rodnan TSS) in systemic  
13  
14 sclerosis. *J Rheumatol*. 1995; 22:1281–5.  
15  
16  
17 32. Ritter PL, Lorig K. The English and Spanish Self-Efficacy to Manage Chronic Disease  
18  
19 Scale measures were validated using multiple studies. *J Clin Epidemiol* 2014;67:1265-73  
20  
21  
22 33. Riehm KE, Kwakkenbos L, Carrier ME, Bartlett SJ, Malcarne VL, Mouthon L, et al.  
23  
24 Validation of the Self-Efficacy for Managing Chronic Disease (SEMCD) Scale: A  
25  
26 Scleroderma Patient-centered Intervention Network (SPIN) Cohort Study. *Arthritis Care*  
27  
28 *Res* 2016;68:1195-200.  
29  
30  
31 34. The NIH Patient-Reported Outcomes Measurement Information System.  
32  
33 [http://www.healthmeasures.net/explore-measurement-systems/promis]. Accessed October  
34  
35 3, 2018.  
36  
37  
38 35. Kwakkenbos L, Thombs BD, Khanna D, Carrier ME, Baron M, Furst D, et al. Performance  
39  
40 of the Patient-Reported Outcomes Measurement Information System-29 in scleroderma: a  
41  
42 Scleroderma Patient-centered Intervention Network Cohort study. *Rheumatology*. 2017;  
43  
44 56:1302-11.  
45  
46  
47 36. Duruöz MT, Poiraudau S, Fermanian J, Menkes CJ, Amor B, Dougados M, et al.  
48  
49 Development and validation of a rheumatoid hand functional disability scale that assesses  
50  
51 functional handicap. *J Rheumatol* 1996;23:1167-72.  
52  
53  
54  
55  
56  
57  
58  
59  
60

- 1  
2  
3 37. Rannou F, Poiraudeau S, Berezne A, Baubet T, Le-guern V, Cabane J, et al. Assessing  
4 disability and quality of life in systemic sclerosis: construct validities of the Cochin Hand  
5 Function Scale, Health Assessment Questionnaire (HAQ), Systemic Sclerosis HAQ, and  
6 Medical Outcomes Study 36-Item Short Form Health Survey. *Arthritis Rheumatol*  
7 2007;57:94-102.  
8  
9  
10  
11  
12  
13  
14 38. Hart TA, Flora DB, Palyo SA, Fresco DM, Holle C, Heimberg RG. Development and  
15 examination of the Social Appearance Anxiety Scale. *Assessment* 2008;15:48–59.  
16  
17  
18 39. Mills SD, Kwakkenbos L, Carrier ME, et al. Validation of the Social Appearance Anxiety  
19 Scale in patients with systemic sclerosis: a Scleroderma Patient-Centered Intervention  
20 Network Cohort study. *Arthritis Care Res.* 2018;70:1557-1562.  
21  
22  
23  
24 40. Kwakkenbos L, Carrier ME, Boutron I, Welling J, Sauve M, van den Ende CHM, et al.  
25 Randomized feasibility trial of the Scleroderma Patient-centered Intervention Network  
26 Hand Exercise Program (SPIN-HAND). *J Scleroderma Relat Disord.* 2018;3:S199–209.  
27  
28  
29  
30  
31 41. Hofstede J, de Bie J, van Wijngaarden B, Heijmans M. Knowledge, use and attitude toward  
32 eHealth among patients with chronic lung diseases. *Int J Med Inform.* 2014;83:967-974.  
33  
34  
35  
36 42. Edwards L, Thomas C, Gregory A, Yardley L, O'Cathain A, Montgomery AA, Salisbury  
37 C. Are people with chronic diseases interested in using telehealth? A cross-sectional postal  
38 survey. *J Med Internet Res.* 2014;16:e123.  
39  
40  
41  
42  
43 43. King, William R.; HE, Jun. A meta-analysis of the technology acceptance  
44 model. *Information & Management.* 2006;43:740-755.  
45  
46  
47  
48  
49  
50  
51  
52  
53  
54  
55  
56  
57  
58  
59  
60

**Table 1. Demographic characteristics (N=1,060)**

| <b>Variable</b>                                                          | <b>Value</b> |
|--------------------------------------------------------------------------|--------------|
| <b>Demographic</b>                                                       |              |
| Age in years, mean (SD)                                                  | 54.6 (12.2)  |
| Female sex, n (%)                                                        | 932 (88)     |
| Education in years, mean (SD)                                            | 15.0 (3.6)   |
| Married or living as married, n (%)                                      | 751 (71)     |
| Country, n (%)                                                           |              |
| Canada                                                                   | 273 (26)     |
| United States                                                            | 416 (39)     |
| United Kingdom                                                           | 117 (11)     |
| France                                                                   | 218 (21)     |
| Spain                                                                    | 32 (3)       |
| Mexico                                                                   | 4 (0)        |
| <b>Disease characteristics</b>                                           |              |
| Time since onset first non-Raynaud's symptom or sign in years, mean (SD) | 11.3 (8.5)   |
| Time since onset Raynaud's in years, mean (SD) <sup>a</sup>              | 14.6 (11.6)  |
| Time since diagnosis in years, mean (SD) <sup>b</sup>                    | 9.4 (7.8)    |
| Diffuse disease subtype, n (%)                                           | 439 (41.4)   |
| Modified Rodnan Skin Score, mean (SD) <sup>c</sup>                       | 8.1 (8.6)    |
| <b>Signalling question scores:</b>                                       |              |
| Fatigue, mean (SD)                                                       | 6.8 (3.2)    |
| Hand function and mobility, mean (SD)                                    | 6.8 (3.4)    |
| Sleep problems, mean (SD)                                                | 6.0 (3.7)    |
| Emotions and stress, mean (SD)                                           | 5.8 (3.6)    |
| Body image and appearance, mean (SD)                                     | 5.1 (3.7)    |



|                                               |           |
|-----------------------------------------------|-----------|
| Pain, mean (SD)                               | 6.3 (3.4) |
| Self-management/ coping strategies, mean (SD) | 6.6 (3.3) |
| Nutrition/Diet, mean (SD)                     | 6.9 (3.2) |
| Exercise, mean (SD)                           | 7.0 (2.9) |

**Patient-reported outcome measures:**

|                                                          |             |
|----------------------------------------------------------|-------------|
| Self-Efficacy to Manage Chronic Disease Scale, mean (SD) | 6.3 (2.2)   |
| PROMIS-29 fatigue, mean (SD)                             | 55.9 (10.7) |
| PROMIS-29 sleep, mean (SD)                               | 52.8 (8.6)  |
| PROMIS-29 depression, mean (SD)                          | 51.7 (9.3)  |
| PROMIS-29 pain, mean (SD)                                | 56.4 (9.3)  |
| Cochin Hand Function Scale, mean (SD)                    | 14.7 (16.4) |
| Social Appearance Anxiety Scale, mean (SD)               | 29.6 (13.7) |
| Interference from gastrointestinal problems, mean (SD)   | 2.7 (3.0)   |
| <u>Physical Activity</u> , mean (SD)                     | 1.7 (1.1)   |

Due to missing data: <sup>a</sup>N=986, <sup>b</sup>N=1,053, <sup>c</sup>N=879

**Table 2. Correlations between signalling items (n = 1,060)**

|                                | (1)  | (2)  | (3)  | (4)  | (5)  | (6)  | (7)  | (8)  | (9)  |
|--------------------------------|------|------|------|------|------|------|------|------|------|
| (1) Fatigue                    | 1.00 |      |      |      |      |      |      |      |      |
| (2) Hand function and mobility | 0.55 | 1.00 |      |      |      |      |      |      |      |
| (3) Sleep problems             | 0.63 | 0.46 | 1.00 |      |      |      |      |      |      |
| (4) Emotions and stress        | 0.60 | 0.47 | 0.61 | 1.00 |      |      |      |      |      |
| (5) Concerns about body image  | 0.49 | 0.46 | 0.52 | 0.71 | 1.00 |      |      |      |      |
| (6) Pain                       | 0.62 | 0.59 | 0.58 | 0.61 | 0.53 | 1.00 |      |      |      |
| (7) Self-management            | 0.60 | 0.63 | 0.53 | 0.65 | 0.60 | 0.69 | 1.00 |      |      |
| (8) Nutrition and diet         | 0.53 | 0.49 | 0.48 | 0.57 | 0.52 | 0.52 | 0.65 | 1.00 |      |
| (9) Exercise                   | 0.47 | 0.52 | 0.43 | 0.50 | 0.48 | 0.46 | 0.60 | 0.70 | 1.00 |

\*All correlations are significant with  $p < 0.001$

**Table 3. Multiple linear regression analyses of the relationship between sociodemographic and disease variables with the signalling questions (n = 1,060)**

|                                    | <b>Fatigue<sup>1</sup></b> | <b>Hand function and mobility<sup>2</sup></b> | <b>Sleep problems<sup>3</sup></b> | <b>Emotions and stress<sup>4</sup></b> | <b>Body image<sup>5</sup></b> | <b>Pain<sup>6</sup></b> | <b>Self-management</b> | <b>Nutrition and diet<sup>7</sup></b> | <b>Exercise<sup>8</sup></b> |
|------------------------------------|----------------------------|-----------------------------------------------|-----------------------------------|----------------------------------------|-------------------------------|-------------------------|------------------------|---------------------------------------|-----------------------------|
|                                    | <b>β (P-value)</b>         | <b>β (P-value)</b>                            | <b>β (P-value)</b>                | <b>β (P-value)</b>                     | <b>β (P-value)</b>            | <b>β (P-value)</b>      | <b>β (P-value)</b>     | <b>β (P-value)</b>                    | <b>β (P-value)</b>          |
| Age in years                       | 0.05 (0.03)                | 0.02 (0.41)                                   | 0.08 (<0.01)                      | -0.08 (<0.01)                          | -0.05 (0.02)                  | 0.01 (0.70)             | 0.03 (0.18)            | <-0.01 (0.95)                         | 0.01 (0.73)                 |
| Male sex                           | 0.06 (<0.01)               | 0.02 (0.43)                                   | 0.01 (0.60)                       | -0.02 (0.26)                           | -0.03 (0.11)                  | 0.04 (0.03)             | <0.01 (0.84)           | -0.05 (0.01)                          | -0.02 (0.31)                |
| Disease duration                   | -0.02 (0.44)               | -0.01 (0.58)                                  | <-0.01 (0.94)                     | -0.03 (0.10)                           | -0.02 (0.35)                  | 0.01 (0.47)             | -0.01 (0.78)           | -0.02 (0.36)                          | <-0.01 (0.98)               |
| Diffuse disease                    | -0.05 (0.02)               | 0.02 (0.31)                                   | -0.04 (0.08)                      | -0.02 (0.42)                           | 0.01 (0.63)                   | -0.03 (0.19)            | 0.02 (0.34)            | -0.01 (0.62)                          | 0.03 (0.27)                 |
| Education in years                 | <0.01 (0.87)               | <-0.01 (0.99)                                 | 0.03 (0.10)                       | 0.01 (0.60)                            | -0.06 (0.01)                  | -0.05 (<0.01)           | -0.01 (0.47)           | 0.06 (0.01)                           | 0.07 (<0.01)                |
| Married or living as married       | 0.03 (0.21)                | 0.03 (0.19)                                   | <-0.01 (0.95)                     | -0.04 (0.03)                           | <0.01 (0.88)                  | 0.02 (0.43)             | 0.01 (0.45)            | -0.01 (0.61)                          | -0.01 (0.69)                |
| Self-efficacy                      | 0.10 (<0.01)               | 0.11 (<0.01)                                  | 0.13 (<0.01)                      | 0.03 (0.13)                            | 0.09 (<0.01)                  | 0.04 (0.05)             | -0.03 (0.12)           | 0.09 (<0.01)                          | 0.16 (<0.01)                |
| Symptom measure                    | 0.30 (<0.01)               | 0.21 (<0.01)                                  | 0.43 (<0.01)                      | 0.18 (<0.01)                           | 0.28 (<0.01)                  | 0.32 (<0.01)            | ---                    | 0.07 (<0.01)                          | -0.04 (0.13)                |
| Mean of remaining signalling items | 0.65 (<0.01)               | 0.63 (<0.01)                                  | 0.61 (<0.01)                      | 0.72 (<0.01)                           | 0.64 (<0.01)                  | 0.67 (<0.01)            | 0.80 (<0.01)           | 0.71 (<0.01)                          | 0.70 (<0.01)                |
| R <sup>2</sup>                     | 0.58                       | 0.47                                          | 0.61                              | 0.62                                   | 0.55                          | 0.64                    | 0.64                   | 0.51                                  | 0.46                        |

β: standardized regression coefficient

Symptom measures for the models: <sup>1</sup>PROMIS-29 Fatigue; <sup>2</sup>Cochin Hand Function; <sup>3</sup>PROMIS-29 sleep; <sup>4</sup>PROMIS-29 depression; <sup>5</sup>SAAS score; <sup>6</sup>PROMIS-29 Pain; <sup>7</sup>Interference of GI symptoms; <sup>8</sup>Activity level

1  
2  
3  
4  
5  
6  
7  
8  
9  
10  
11  
12  
13  
14  
15  
16  
17  
18  
19  
20  
21  
22  
23  
24  
25  
26  
27  
28  
29  
30  
31  
32  
33  
34  
35  
36  
37  
38  
39  
40  
41  
42  
43  
44  
45  
46  
47  
48  
49  
50  
51  
52  
53  
54  
55  
56  
57  
58  
59  
60

For peer review only

## APPENDIX

Table A. Frequencies for signaling item responses (N=1,060)

|                 | <b>Fatigue</b> | <b>Hand function</b> | <b>Sleep problems</b> | <b>Emotions and stress</b> | <b>Body image</b> | <b>Pain</b>  | <b>Self-management</b> | <b>Nutrition and diet</b> | <b>Exercise</b> |
|-----------------|----------------|----------------------|-----------------------|----------------------------|-------------------|--------------|------------------------|---------------------------|-----------------|
| <b>Response</b> | <b>N (%)</b>   | <b>N (%)</b>         | <b>N (%)</b>          | <b>N (%)</b>               | <b>N (%)</b>      | <b>N (%)</b> | <b>N (%)</b>           | <b>N (%)</b>              | <b>N (%)</b>    |
| <b>0</b>        | 55 (5.2)       | 76 (7.2)             | 153 (14.4)            | 122 (11.5)                 | 182 (17.2)        | 88 (8.3)     | 76 (7.2)               | 48 (4.5)                  | 0 (0.0)         |
| <b>1</b>        | 57 (5.4)       | 56 (5.3)             | 51 (4.8)              | 72 (6.8)                   | 87 (8.2)          | 57 (5.4)     | 59 (5.6)               | 53 (5.0)                  | 64 (6.0)        |
| <b>2</b>        | 45 (4.3)       | 40 (3.8)             | 43 (4.1)              | 66 (6.2)                   | 78 (7.4)          | 55 (5.2)     | 34 (3.2)               | 36 (3.4)                  | 40 (3.8)        |
| <b>3</b>        | 46 (4.3)       | 53 (5.0)             | 49 (4.6)              | 51 (4.8)                   | 66 (6.2)          | 58 (5.5)     | 48 (4.5)               | 49 (4.6)                  | 59 (5.6)        |
| <b>4</b>        | 30 (2.8)       | 29 (2.7)             | 39 (3.7)              | 36 (3.4)                   | 36 (3.4)          | 35 (3.3)     | 32 (3.0)               | 33 (3.1)                  | 47 (4.4)        |
| <b>5</b>        | 119 (11.2)     | 110 (10.4)           | 124 (11.7)            | 141 (13.3)                 | 133 (12.6)        | 132 (12.5)   | 128 (12.1)             | 137 (12.9)                | 167 (15.8)      |
| <b>6</b>        | 50 (4.7)       | 48 (4.5)             | 40 (3.8)              | 56 (5.3)                   | 47 (4.4)          | 60 (5.7)     | 69 (6.5)               | 53 (5.0)                  | 54 (5.1)        |
| <b>7</b>        | 89 (8.4)       | 92 (8.7)             | 77 (7.3)              | 88 (8.3)                   | 64 (6.0)          | 88 (8.3)     | 90 (8.5)               | 82 (7.7)                  | 78 (7.4)        |
| <b>8</b>        | 132 (12.5)     | 105 (9.9)            | 101 (9.5)             | 87 (8.2)                   | 82 (7.7)          | 113 (10.7)   | 118 (11.1)             | 116 (10.9)                | 118 (11.1)      |
| <b>9</b>        | 69 (6.5)       | 83 (7.8)             | 69 (6.5)              | 66 (6.2)                   | 56 (5.3)          | 75 (7.1)     | 72 (6.8)               | 74 (7.0)                  | 69 (6.5)        |
| <b>10</b>       | 368 (34.7)     | 368 (34.7)           | 314 (29.6)            | 275 (25.9)                 | 229 (21.6)        | 299 (28.2)   | 334 (31.5)             | 379 (35.8)                | 364 (34.3)      |

**Table B1. Multiple linear regression of the relationship between sociodemographic and disease variables with signalling question on fatigue (n = 1,060)**

|                                    | <b>B (95% CI)</b>      | <b>β</b> | <b>P</b> |
|------------------------------------|------------------------|----------|----------|
| <b>Step 1:</b>                     |                        |          |          |
| Age in years                       | 0.01 (0.00 to 0.02)    | 0.05     | 0.031    |
| Male sex                           | 0.64 (0.24 to 1.03)    | 0.06     | 0.002    |
| Disease duration                   | -0.01 (-0.02 to 0.01)  | -0.02    | 0.442    |
| Diffuse disease                    | -0.31 (-0.58 to -0.04) | -0.05    | 0.023    |
| Education in years                 | 0.00 (-0.03 to 0.04)   | <0.01    | 0.867    |
| Married or living as married       | 0.18 (-0.10 to 0.47)   | 0.03     | 0.208    |
| Self-efficacy                      | 0.14 (0.07 to 0.22)    | 0.10     | <0.001   |
| <i>Total R<sup>2</sup></i>         | 0.04                   |          |          |
| <b>Step 2:</b>                     |                        |          |          |
| Mean of remaining signalling items | 0.80 (0.75 to 0.85)    | 0.65     | <0.001   |
| <i>Total R<sup>2</sup></i>         | 0.53                   |          |          |
| <i>R<sup>2</sup> change</i>        | 0.49                   |          | <0.001   |
| <b>Step 3:</b>                     |                        |          |          |
| PROMIS-29 Fatigue                  | 0.09 (0.08 to 0.11)    | 0.30     | <0.001   |
| <i>Total R<sup>2</sup></i>         | 0.58                   |          |          |
| <i>R<sup>2</sup> change</i>        | 0.05                   |          | <0.001   |

B (95% CI): raw regression coefficient and 95% confidence interval; β: standardized regression coefficient

All B and β values are for the Step 3 model.

**Table B2. Multiple linear regression of the relationship between sociodemographic and disease variables with signalling question on hand function and mobility (n = 1,060)**

|                                    | <b>B (95% CI)</b>     | <b>β</b> | <b>P</b> |
|------------------------------------|-----------------------|----------|----------|
| <b>Step 1:</b>                     |                       |          |          |
| Age in years                       | 0.01 (-0.01 to 0.02)  | 0.02     | 0.407    |
| Male sex                           | 0.19 (-0.27 to 0.65)  | 0.02     | 0.425    |
| Disease duration                   | -0.01 (-0.02 to 0.01) | -0.01    | 0.578    |
| Diffuse disease                    | 0.17 (-0.16 to 0.49)  | 0.02     | 0.311    |
| Education in years                 | 0.00 (-0.04 to 0.04)  | <-0.01   | 0.986    |
| Married or living as married       | 0.22 (-0.11 to 0.56)  | 0.03     | 0.190    |
| Self-efficacy                      | 0.16 (0.09 to 0.24)   | 0.11     | <0.001   |
| <i>Total R<sup>2</sup></i>         | 0.03                  |          |          |
| <b>Step 2:</b>                     |                       |          |          |
| Mean of remaining signalling items | 0.80 (0.75 to 0.86)   | 0.63     | <0.001   |
| <i>Total R<sup>2</sup></i>         | 0.44                  |          |          |
| <i>R<sup>2</sup> change</i>        | 0.41                  |          | <0.001   |
| <b>Step 3:</b>                     |                       |          |          |
| Cochin Hand function               | 0.04 (0.03 to 0.05)   | 0.21     | <0.001   |
| <i>Total R<sup>2</sup></i>         | 0.47                  |          |          |
| <i>R<sup>2</sup> change</i>        | 0.03                  |          | <0.001   |

B (95% CI): raw regression coefficient and 95% confidence interval; β: standardized regression coefficient

All B and β values are for the Step 3 model.

**Table B3. Multiple linear regression of the relationship between sociodemographic and disease variables with signalling question on sleep problems (n = 1,060)**

|                                    | <b>B (95% CI)</b>     | <b>β</b> | <b>P</b> |
|------------------------------------|-----------------------|----------|----------|
| <b>Step 1:</b>                     |                       |          |          |
| Age in years                       | 0.02 (0.01 to 0.03)   | 0.08     | <0.001   |
| Male sex                           | 0.12 (-0.32 to 0.55)  | 0.01     | 0.596    |
| Disease duration                   | 0.00 (-0.02 to 0.02)  | <-0.01   | 0.936    |
| Diffuse disease                    | -0.26 (-0.56 to 0.03) | -0.04    | 0.080    |
| Education in years                 | 0.03 (-0.01 to 0.07)  | 0.03     | 0.098    |
| Married or living as married       | -0.01 (-0.32 to 0.30) | <-0.01   | 0.949    |
| Self-efficacy                      | 0.21 (0.14 to 0.28)   | 0.13     | <0.001   |
| <i>Total R<sup>2</sup></i>         | 0.03                  |          |          |
| <b>Step 2:</b>                     |                       |          |          |
| Mean of remaining signalling items | 0.85 (0.80 to 0.91)   | 0.61     | <0.001   |
| <i>Total R<sup>2</sup></i>         | 0.46                  |          |          |
| <i>R<sup>2</sup> change</i>        | 0.43                  |          | <0.001   |
| <b>Step 3:</b>                     |                       |          |          |
| PROMIS-29 sleep                    | 0.18 (0.16 to 0.20)   | 0.43     | <0.001   |
| <i>Total R<sup>2</sup></i>         | 0.61                  |          |          |
| <i>R<sup>2</sup> change</i>        | 0.14                  |          | <0.001   |

B (95% CI): raw regression coefficient and 95% confidence interval; β: standardized regression coefficient

All B and β values are for the Step 3 model.



**Table B4. Multiple linear regression of the relationship between sociodemographic and disease variables with signalling question on emotions and stress (n = 1,060)**

|                                    | <b>B (95% CI)</b>      | <b>β</b> | <b>P</b> |
|------------------------------------|------------------------|----------|----------|
| <b>Step 1:</b>                     |                        |          |          |
| Age in years                       | -0.02 (-0.03 to -0.01) | -0.08    | <0.001   |
| Male sex                           | -0.24 (-0.65 to 0.17)  | -0.02    | 0.257    |
| Disease duration                   | -0.01 (-0.03 to 0.00)  | -0.03    | 0.096    |
| Diffuse disease                    | -0.11 (-0.39 to 0.16)  | -0.02    | 0.421    |
| Education in years                 | 0.01 (-0.03 to 0.05)   | 0.01     | 0.597    |
| Married or living as married       | -0.33 (-0.62 to -0.03) | -0.04    | 0.032    |
| Self-efficacy                      | 0.05 (-0.02 to 0.13)   | 0.03     | 0.131    |
| <i>Total R<sup>2</sup></i>         | 0.08                   |          |          |
| <b>Step 2:</b>                     |                        |          |          |
| Mean of remaining signalling items | 0.99 (0.93 to 1.04)    | 0.72     | <0.001   |
| <i>Total R<sup>2</sup></i>         | 0.60                   |          |          |
| <i>R<sup>2</sup> change</i>        | 0.52                   |          | <0.001   |
| <b>Step 3:</b>                     |                        |          |          |
| PROMIS-29 depression               | 0.07 (0.05 to 0.08)    | 0.18     | <0.001   |
| <i>Total R<sup>2</sup></i>         | 0.63                   |          |          |
| <i>R<sup>2</sup> change</i>        | 0.02                   |          | <0.001   |

B (95% CI): raw regression coefficient and 95% confidence interval; β: standardized regression coefficient

All B and β values are for the Step 3 model.

**Table B5. Multiple linear regression of the relationship between sociodemographic and disease variables with signalling question on concerns about body image (n = 1,060)**

|                                    | <b>B (95% CI)</b>      | <b>β</b> | <b>P</b> |
|------------------------------------|------------------------|----------|----------|
| <b>Step 1:</b>                     |                        |          |          |
| Age in years                       | -0.02 (-0.03 to 0.00)  | -0.05    | 0.023    |
| Male sex                           | -0.38 (-0.85 to 0.09)  | -0.03    | 0.109    |
| Disease duration                   | -0.01 (-0.03 to 0.01)  | -0.02    | 0.350    |
| Diffuse disease                    | 0.08 (-0.24 to 0.40)   | 0.01     | 0.627    |
| Education in years                 | -0.06 (-0.10 to -0.01) | -0.06    | 0.009    |
| Married or living as married       | 0.03 (-0.31 to 0.36)   | <0.01    | 0.879    |
| Self-efficacy                      | 0.16 (0.08 to 0.23)    | 0.09     | <0.001   |
| <i>Total R<sup>2</sup></i>         | 0.07                   |          |          |
| <b>Step 2:</b>                     |                        |          |          |
| Mean of remaining signalling items | 0.91 (0.85 to 0.97)    | 0.64     | <0.001   |
| <i>Total R<sup>2</sup></i>         | 0.49                   |          |          |
| <i>R<sup>2</sup> change</i>        | 0.43                   |          | <0.001   |
| <b>Step 3:</b>                     |                        |          |          |
| SAAS score                         | 0.08 (0.06 to 0.09)    | 0.28     | <0.001   |
| <i>Total R<sup>2</sup></i>         | 0.55                   |          |          |
| <i>R<sup>2</sup> change</i>        | 0.06                   |          | <0.001   |

B (95% CI): raw regression coefficient and 95% confidence interval; β: standardized regression coefficient

All B and β values are for the Step 3 model.

**Table B6. Multiple linear regression of the relationship between sociodemographic and disease variables with signalling question on pain (n = 1,060)**

|                                    | <b>B (95% CI)</b>      | <b>β</b> | <b>P</b> |
|------------------------------------|------------------------|----------|----------|
| <b>Step 1:</b>                     |                        |          |          |
| Age in years                       | 0.00 (-0.01 to 0.01)   | 0.01     | 0.696    |
| Male sex                           | 0.42 (0.04 to 0.81)    | 0.04     | 0.032    |
| Disease duration                   | 0.01 (-0.01 to 0.02)   | 0.01     | 0.467    |
| Diffuse disease                    | -0.17 (-0.44 to 0.09)  | -0.03    | 0.193    |
| Education in years                 | -0.05 (-0.09 to -0.02) | -0.05    | 0.005    |
| Married or living as married       | 0.11 (-0.17 to 0.39)   | 0.02     | 0.426    |
| Self-efficacy                      | 0.07 (0.00 to 0.14)    | 0.04     | 0.047    |
| <i>Total R<sup>2</sup></i>         |                        |          |          |
| <b>Step 2:</b>                     |                        |          |          |
| Mean of remaining signalling items | 0.86 (0.81 to 0.91)    | 0.67     | <0.001   |
| <i>Total R<sup>2</sup></i>         |                        |          |          |
| <i>R<sup>2</sup> change</i>        |                        |          |          |
|                                    | 0.07                   |          | <0.001   |
|                                    | 0.57                   |          | <0.001   |
| <b>Step 3:</b>                     |                        |          |          |
| PROMIS-29 Pain                     | 0.12 (0.10 to 0.13)    | 0.32     | <0.001   |
| <i>Total R<sup>2</sup></i>         |                        |          |          |
| <i>R<sup>2</sup> change</i>        |                        |          |          |
|                                    | 0.64                   |          | <0.001   |
|                                    | 0.07                   |          | <0.001   |

B (95% CI): raw regression coefficient and 95% confidence interval; β: standardized regression coefficient

All B and β values are for the Step 3 model.

**Table B7. Multiple linear regression of the relationship between sociodemographic and disease variables with signalling question on self-management (n = 1,060)**

|                                    | <b>B (95% CI)</b>     | <b>β</b> | <b>P</b> |
|------------------------------------|-----------------------|----------|----------|
| <b>Step 1:</b>                     |                       |          |          |
| Age in years                       | 0.01 (0.00 to 0.02)   | 0.03     | 0.176    |
| Male sex                           | 0.04 (-0.34 to 0.41)  | <0.01    | 0.843    |
| Disease duration                   | 0.00 (-0.02 to 0.01)  | -0.01    | 0.775    |
| Diffuse disease                    | 0.12 (-0.13 to 0.38)  | 0.02     | 0.335    |
| Education in years                 | -0.01 (-0.05 to 0.02) | -0.01    | 0.466    |
| Married or living as married       | 0.10 (-0.17 to 0.37)  | 0.01     | 0.453    |
| Self-efficacy                      | -0.04 (-0.10 to 0.01) | -0.03    | 0.124    |
| <i>Total R<sup>2</sup></i>         | 0.04                  |          |          |
| <b>Step 2:</b>                     |                       |          |          |
| Mean of remaining signalling items | 1.01 (0.96 to 1.06)   | 0.80     | <0.001   |
| <i>Total R<sup>2</sup></i>         | 0.64                  |          |          |
| <i>R<sup>2</sup> change</i>        | 0.60                  |          | <0.001   |

B (95% CI): raw regression coefficient and 95% confidence interval; β: standardized regression coefficient

All B and β values are for the Step 3 model.

**Table B8. Multiple linear regression of the relationship between sociodemographic and disease variables with signalling question on nutrition/diet (n = 1,060)**

|                                    | <b>B (95% CI)</b>      | <b>β</b> | <b>P</b> |
|------------------------------------|------------------------|----------|----------|
| <b>Step 1:</b>                     |                        |          |          |
| Age in years                       | 0.00 (-0.01 to 0.01)   | <-0.01   | 0.949    |
| Male sex                           | -0.53 (-0.94 to -0.11) | -0.05    | 0.014    |
| Disease duration                   | -0.01 (-0.02 to 0.01)  | -0.02    | 0.356    |
| Diffuse disease                    | -0.07 (-0.35 to 0.21)  | -0.01    | 0.621    |
| Education in years                 | 0.05 (0.01 to 0.09)    | 0.06     | 0.011    |
| Married or living as married       | -0.08 (-0.38 to 0.22)  | -0.01    | 0.613    |
| Self-efficacy                      | 0.12 (0.06 to 0.19)    | 0.09     | <0.001   |
| <i>Total R<sup>2</sup></i>         | 0.03                   |          |          |
| <b>Step 2:</b>                     |                        |          |          |
| Mean of remaining signalling items | 0.84 (0.79 to 0.89)    | 0.71     | <0.001   |
| <i>Total R<sup>2</sup></i>         | 0.51                   |          |          |
| <i>R<sup>2</sup> change</i>        | 0.48                   |          | <0.001   |
| <b>Step 3:</b>                     |                        |          |          |
| Interference of GI symptoms        | 0.07 (0.02 to 0.12)    | 0.07     | 0.004    |
| <i>Total R<sup>2</sup></i>         | 0.51                   |          |          |
| <i>R<sup>2</sup> change</i>        | <0.01                  |          | <0.001   |

B (95% CI): raw regression coefficient and 95% confidence interval; β: standardized regression coefficient

All B and β values are for the Step 3 model.

**Table B9. Multiple linear regression of the relationship between sociodemographic and disease variables with signalling question on exercise (n = 1,060)**

|                                    | <b>B (95% CI)</b>     | <b>β</b> | <b>P</b> |
|------------------------------------|-----------------------|----------|----------|
| <b>Step 1:</b>                     |                       |          |          |
| Age in years                       | 0.00 (-0.01 to 0.01)  | 0.01     | 0.725    |
| Male sex                           | -0.21 (-0.62 to 0.20) | -0.02    | 0.313    |
| Disease duration                   | 0.00 (-0.02 to 0.02)  | <-0.01   | 0.981    |
| Diffuse disease                    | 0.15 (-0.12 to 0.43)  | 0.03     | 0.273    |
| Education in years                 | 0.06 (0.02 to 0.09)   | 0.07     | 0.003    |
| Married or living as married       | -0.06 (-0.35 to 0.23) | -0.01    | 0.689    |
| Self-efficacy                      | 0.21 (0.14 to 0.27)   | 0.16     | <0.001   |
| <i>Total R<sup>2</sup></i>         | 0.02                  |          |          |
| <b>Step 2:</b>                     |                       |          |          |
| Mean of remaining signalling items | 0.74 (0.69 to 0.79)   | 0.70     | <0.001   |
| <i>Total R<sup>2</sup></i>         | 0.46                  |          |          |
| <i>R<sup>2</sup> change</i>        | 0.44                  |          | <0.001   |
| <b>Step 3:</b>                     |                       |          |          |
| Activity level                     | -0.10 (-0.24 to 0.03) | -0.04    | 0.130    |
| <i>Total R<sup>2</sup></i>         | 0.46                  |          |          |
| <i>R<sup>2</sup> change</i>        | <0.01                 |          | 0.13     |

B (95% CI): raw regression coefficient and 95% confidence interval; β: standardized regression coefficient

All B and β values are for the Step 3 model.

**STROBE Statement**

## Checklist of items that should be included in reports of observational studies

1  
2  
3  
4  
5  
6  
7  
8  
9  
10  
11  
12  
13  
14  
15  
16  
17  
18  
19  
20  
21  
22  
23  
24  
25  
26  
27  
28  
29  
30  
31  
32  
33  
34  
35  
36  
37  
38  
39  
40  
41  
42  
43  
44  
45  
46  
47

| Section/Topic             | Item No | Recommendation                                                                                                                                                                             | Reported on Page No |
|---------------------------|---------|--------------------------------------------------------------------------------------------------------------------------------------------------------------------------------------------|---------------------|
| <b>Title and abstract</b> | 1       | (a) Indicate the study's design with a commonly used term in the title or the abstract                                                                                                     | 1                   |
|                           |         | (b) Provide in the abstract an informative and balanced summary of what was done and what was found                                                                                        | 9,10                |
| <b>Introduction</b>       |         |                                                                                                                                                                                            |                     |
| Background/rationale      | 2       | Explain the scientific background and rationale for the investigation being reported                                                                                                       | 12,13,14            |
| Objectives                | 3       | State specific objectives, including any prespecified hypotheses                                                                                                                           | 14                  |
| <b>Methods</b>            |         |                                                                                                                                                                                            |                     |
| Study design              | 4       | Present key elements of study design early in the paper                                                                                                                                    | 14,15               |
| Setting                   | 5       | Describe the setting, locations, and relevant dates, including periods of recruitment, exposure, follow-up, and data collection                                                            | 14,15               |
|                           |         | (a) <i>Cohort study</i> —Give the eligibility criteria, and the sources and methods of selection of participants. Describe methods of follow-up                                            |                     |
| Participants              | 6       | <i>Case-control study</i> —Give the eligibility criteria, and the sources and methods of case ascertainment and control selection. Give the rationale for the choice of cases and controls | 15                  |
|                           |         | <i>Cross-sectional study</i> —Give the eligibility criteria, and the sources and methods of selection of participants                                                                      |                     |
|                           |         | (b) <i>Cohort study</i> —For matched studies, give matching criteria and number of exposed and unexposed                                                                                   |                     |
| Variables                 | 7       | <i>Case-control study</i> —For matched studies, give matching criteria and the number of controls per case                                                                                 |                     |
|                           |         | Clearly define all outcomes, exposures, predictors, potential confounders, and effect modifiers. Give diagnostic criteria, if applicable                                                   | 15, 16, 17          |
| Data sources/measurement  | 8*      | For each variable of interest, give sources of data and details of methods of assessment (measurement). Describe comparability of assessment methods if there is more than one group       | 15, 16, 17          |
| Bias                      | 9       | Describe any efforts to address potential sources of bias                                                                                                                                  | N/A                 |
| Study size                | 10      | Explain how the study size was arrived at                                                                                                                                                  | 19                  |
| Quantitative variables    | 11      | Explain how quantitative variables were handled in the analyses. If applicable, describe which groupings were chosen and why                                                               | 17,18               |
|                           |         | (a) Describe all statistical methods, including those used to control for confounding                                                                                                      | 17,18               |
|                           |         | (b) Describe any methods used to examine subgroups and interactions                                                                                                                        | N/A                 |
|                           |         | (c) Explain how missing data were addressed                                                                                                                                                | 19                  |
|                           |         | (d) <i>Cohort study</i> —If applicable, explain how loss to follow-up was addressed                                                                                                        |                     |
| Statistical methods       | 12      | <i>Case-control study</i> —If applicable, explain how matching of cases and controls was addressed                                                                                         | N/A                 |
|                           |         | <i>Cross-sectional study</i> —If applicable, describe analytical methods taking account of sampling strategy                                                                               |                     |
|                           |         | (e) Describe any sensitivity analyses                                                                                                                                                      | N/A                 |

| Section/Topic            | Item No | Recommendation                                                                                                                                                                                               | Reported on Page No              |
|--------------------------|---------|--------------------------------------------------------------------------------------------------------------------------------------------------------------------------------------------------------------|----------------------------------|
| <b>Results</b>           |         |                                                                                                                                                                                                              |                                  |
| Participants             | 13*     | (a) Report numbers of individuals at each stage of study—eg numbers potentially eligible, examined for eligibility, confirmed eligible, included in the study, completing follow-up, and analysed            | 19                               |
|                          |         | (b) Give reasons for non-participation at each stage                                                                                                                                                         | 19                               |
|                          |         | (c) Consider use of a flow diagram                                                                                                                                                                           | N/A                              |
| Descriptive data         | 14*     | (a) Give characteristics of study participants (eg demographic, clinical, social) and information on exposures and potential confounders                                                                     | 20 and Table 1                   |
|                          |         | (b) Indicate number of participants with missing data for each variable of interest                                                                                                                          | 19                               |
|                          |         | (c) <i>Cohort study</i> —Summarise follow-up time (eg, average and total amount)                                                                                                                             |                                  |
| Outcome data             | 15*     | <i>Cohort study</i> —Report numbers of outcome events or summary measures over time                                                                                                                          |                                  |
|                          |         | <i>Case-control study</i> —Report numbers in each exposure category, or summary measures of exposure                                                                                                         |                                  |
|                          |         | <i>Cross-sectional study</i> —Report numbers of outcome events or summary measures                                                                                                                           | 20                               |
| Main results             | 16      | (a) Give unadjusted estimates and, if applicable, confounder-adjusted estimates and their precision (eg, 95% confidence interval). Make clear which confounders were adjusted for and why they were included | Table 3 and supplementary tables |
|                          |         | (b) Report category boundaries when continuous variables were categorized                                                                                                                                    | N/A                              |
|                          |         | (c) If relevant, consider translating estimates of relative risk into absolute risk for a meaningful time period                                                                                             | N/A                              |
| Other analyses           | 17      | Report other analyses done—eg analyses of subgroups and interactions, and sensitivity analyses                                                                                                               | N/A                              |
| <b>Discussion</b>        |         |                                                                                                                                                                                                              |                                  |
| Key results              | 18      | Summarise key results with reference to study objectives                                                                                                                                                     | 11                               |
| Limitations              | 19      | Discuss limitations of the study, taking into account sources of potential bias or imprecision. Discuss both direction and magnitude of any potential bias                                                   | 21,22                            |
| Interpretation           | 20      | Give a cautious overall interpretation of results considering objectives, limitations, multiplicity of analyses, results from similar studies, and other relevant evidence                                   | 22,23,24                         |
| Generalisability         | 21      | Discuss the generalisability (external validity) of the study results                                                                                                                                        | 24                               |
| <b>Other Information</b> |         |                                                                                                                                                                                                              |                                  |
| Funding                  | 22      | Give the source of funding and the role of the funders for the present study and, if applicable, for the original study on which the present article is based                                                | 25                               |

\*Give information separately for cases and controls in case-control studies and, if applicable, for exposed and unexposed groups in cohort and cross-sectional studies.



**Note:** An Explanation and Elaboration article discusses each checklist item and gives methodological background and published examples of transparent reporting. The STROBE checklist is best used in conjunction with this article (freely available on the Web sites of PLoS Medicine at <http://www.plosmedicine.org/>, Annals of Internal Medicine at <http://www.annals.org/>, and Epidemiology at <http://www.epidem.com/>). Information on the STROBE Initiative is available at [www.strobe-statement.org](http://www.strobe-statement.org).

For peer review only

1  
2  
3  
4  
5  
6  
7  
8  
9  
10  
11  
12  
13  
14  
15  
16  
17  
18  
19  
20  
21  
22  
23  
24  
25  
26  
27  
28  
29  
30  
31  
32  
33  
34  
35  
36  
37  
38  
39  
40  
41  
42  
43  
44  
45  
46  
47
