# Supplementary material for: Factors associated with patient-reported likelihood of using online self-care interventions: a Scleroderma Patient-centered Intervention Network (SPIN) cohort study
Source: PubMed Central journal article supplement — BMJ Open. 2019 Oct 14;9(10):e029542. doi: 10.1136/bmjopen-2019-029542 (PMC6797412; doi:10.1136/bmjopen-2019-029542), 2019-10-14
Supplement: bmjopen-2019-029542supp001.pdf [file bmjopen-2019-029542supp001.pdf]

## APPENDIX

Table A. Frequencies for signaling item responses (N=1,060)

|                 | <b>Fatigue</b> | <b>Hand function</b> | <b>Sleep problems</b> | <b>Emotions and stress</b> | <b>Body image</b> | <b>Pain</b>  | <b>Self-management</b> | <b>Nutrition and diet</b> | <b>Exercise</b> |
|-----------------|----------------|----------------------|-----------------------|----------------------------|-------------------|--------------|------------------------|---------------------------|-----------------|
| <b>Response</b> | <b>N (%)</b>   | <b>N (%)</b>         | <b>N (%)</b>          | <b>N (%)</b>               | <b>N (%)</b>      | <b>N (%)</b> | <b>N (%)</b>           | <b>N (%)</b>              | <b>N (%)</b>    |
| <b>0</b>        | 55 (5.2)       | 76 (7.2)             | 153 (14.4)            | 122 (11.5)                 | 182 (17.2)        | 88 (8.3)     | 76 (7.2)               | 48 (4.5)                  | 0 (0.0)         |
| <b>1</b>        | 57 (5.4)       | 56 (5.3)             | 51 (4.8)              | 72 (6.8)                   | 87 (8.2)          | 57 (5.4)     | 59 (5.6)               | 53 (5.0)                  | 64 (6.0)        |
| <b>2</b>        | 45 (4.3)       | 40 (3.8)             | 43 (4.1)              | 66 (6.2)                   | 78 (7.4)          | 55 (5.2)     | 34 (3.2)               | 36 (3.4)                  | 40 (3.8)        |
| <b>3</b>        | 46 (4.3)       | 53 (5.0)             | 49 (4.6)              | 51 (4.8)                   | 66 (6.2)          | 58 (5.5)     | 48 (4.5)               | 49 (4.6)                  | 59 (5.6)        |
| <b>4</b>        | 30 (2.8)       | 29 (2.7)             | 39 (3.7)              | 36 (3.4)                   | 36 (3.4)          | 35 (3.3)     | 32 (3.0)               | 33 (3.1)                  | 47 (4.4)        |
| <b>5</b>        | 119 (11.2)     | 110 (10.4)           | 124 (11.7)            | 141 (13.3)                 | 133 (12.6)        | 132 (12.5)   | 128 (12.1)             | 137 (12.9)                | 167 (15.8)      |
| <b>6</b>        | 50 (4.7)       | 48 (4.5)             | 40 (3.8)              | 56 (5.3)                   | 47 (4.4)          | 60 (5.7)     | 69 (6.5)               | 53 (5.0)                  | 54 (5.1)        |
| <b>7</b>        | 89 (8.4)       | 92 (8.7)             | 77 (7.3)              | 88 (8.3)                   | 64 (6.0)          | 88 (8.3)     | 90 (8.5)               | 82 (7.7)                  | 78 (7.4)        |
| <b>8</b>        | 132 (12.5)     | 105 (9.9)            | 101 (9.5)             | 87 (8.2)                   | 82 (7.7)          | 113 (10.7)   | 118 (11.1)             | 116 (10.9)                | 118 (11.1)      |
| <b>9</b>        | 69 (6.5)       | 83 (7.8)             | 69 (6.5)              | 66 (6.2)                   | 56 (5.3)          | 75 (7.1)     | 72 (6.8)               | 74 (7.0)                  | 69 (6.5)        |
| <b>10</b>       | 368 (34.7)     | 368 (34.7)           | 314 (29.6)            | 275 (25.9)                 | 229 (21.6)        | 299 (28.2)   | 334 (31.5)             | 379 (35.8)                | 364 (34.3)      |

**Table B1. Multiple linear regression of the relationship between sociodemographic and disease variables with signalling question on fatigue (n = 1,060)**

|                                    | <b>B (95% CI)</b>      | <b>β</b> | <b>P</b> |
|------------------------------------|------------------------|----------|----------|
| <b>Step 1:</b>                     |                        |          |          |
| Age in years                       | 0.01 (0.00 to 0.02)    | 0.05     | 0.031    |
| Male sex                           | 0.64 (0.24 to 1.03)    | 0.06     | 0.002    |
| Disease duration                   | -0.01 (-0.02 to 0.01)  | -0.02    | 0.442    |
| Diffuse disease                    | -0.31 (-0.58 to -0.04) | -0.05    | 0.023    |
| Education in years                 | 0.00 (-0.03 to 0.04)   | <0.01    | 0.867    |
| Married or living as married       | 0.18 (-0.10 to 0.47)   | 0.03     | 0.208    |
| Self-efficacy                      | 0.14 (0.07 to 0.22)    | 0.10     | <0.001   |
| <i>Total R<sup>2</sup></i>         | 0.04                   |          |          |
| <b>Step 2:</b>                     |                        |          |          |
| Mean of remaining signalling items | 0.80 (0.75 to 0.85)    | 0.65     | <0.001   |
| <i>Total R<sup>2</sup></i>         | 0.53                   |          |          |
| <i>R<sup>2</sup> change</i>        | 0.49                   |          | <0.001   |
| <b>Step 3:</b>                     |                        |          |          |
| PROMIS-29 Fatigue                  | 0.09 (0.08 to 0.11)    | 0.30     | <0.001   |
| <i>Total R<sup>2</sup></i>         | 0.58                   |          |          |
| <i>R<sup>2</sup> change</i>        | 0.05                   |          | <0.001   |

B (95% CI): raw regression coefficient and 95% confidence interval; β: standardized regression coefficient

All B and β values are for the Step 3 model.

**Table B2. Multiple linear regression of the relationship between sociodemographic and disease variables with signalling question on hand function and mobility (n = 1,060)**

|                                    | <b>B (95% CI)</b>     | <b>β</b> | <b>P</b> |
|------------------------------------|-----------------------|----------|----------|
| <b>Step 1:</b>                     |                       |          |          |
| Age in years                       | 0.01 (-0.01 to 0.02)  | 0.02     | 0.407    |
| Male sex                           | 0.19 (-0.27 to 0.65)  | 0.02     | 0.425    |
| Disease duration                   | -0.01 (-0.02 to 0.01) | -0.01    | 0.578    |
| Diffuse disease                    | 0.17 (-0.16 to 0.49)  | 0.02     | 0.311    |
| Education in years                 | 0.00 (-0.04 to 0.04)  | <-0.01   | 0.986    |
| Married or living as married       | 0.22 (-0.11 to 0.56)  | 0.03     | 0.190    |
| Self-efficacy                      | 0.16 (0.09 to 0.24)   | 0.11     | <0.001   |
| <i>Total R<sup>2</sup></i>         | 0.03                  |          |          |
| <b>Step 2:</b>                     |                       |          |          |
| Mean of remaining signalling items | 0.80 (0.75 to 0.86)   | 0.63     | <0.001   |
| <i>Total R<sup>2</sup></i>         | 0.44                  |          |          |
| <i>R<sup>2</sup> change</i>        | 0.41                  |          | <0.001   |
| <b>Step 3:</b>                     |                       |          |          |
| Cochin Hand function               | 0.04 (0.03 to 0.05)   | 0.21     | <0.001   |
| <i>Total R<sup>2</sup></i>         | 0.47                  |          |          |
| <i>R<sup>2</sup> change</i>        | 0.03                  |          | <0.001   |

B (95% CI): raw regression coefficient and 95% confidence interval; β: standardized regression coefficient

All B and β values are for the Step 3 model.

**Table B3. Multiple linear regression of the relationship between sociodemographic and disease variables with signalling question on sleep problems (n = 1,060)**

|                                    | <b>B (95% CI)</b>     | <b>β</b> | <b>P</b> |
|------------------------------------|-----------------------|----------|----------|
| <b>Step 1:</b>                     |                       |          |          |
| Age in years                       | 0.02 (0.01 to 0.03)   | 0.08     | <0.001   |
| Male sex                           | 0.12 (-0.32 to 0.55)  | 0.01     | 0.596    |
| Disease duration                   | 0.00 (-0.02 to 0.02)  | <-0.01   | 0.936    |
| Diffuse disease                    | -0.26 (-0.56 to 0.03) | -0.04    | 0.080    |
| Education in years                 | 0.03 (-0.01 to 0.07)  | 0.03     | 0.098    |
| Married or living as married       | -0.01 (-0.32 to 0.30) | <-0.01   | 0.949    |
| Self-efficacy                      | 0.21 (0.14 to 0.28)   | 0.13     | <0.001   |
| <i>Total R<sup>2</sup></i>         | 0.03                  |          |          |
| <b>Step 2:</b>                     |                       |          |          |
| Mean of remaining signalling items | 0.85 (0.80 to 0.91)   | 0.61     | <0.001   |
| <i>Total R<sup>2</sup></i>         | 0.46                  |          |          |
| <i>R<sup>2</sup> change</i>        | 0.43                  |          | <0.001   |
| <b>Step 3:</b>                     |                       |          |          |
| PROMIS-29 sleep                    | 0.18 (0.16 to 0.20)   | 0.43     | <0.001   |
| <i>Total R<sup>2</sup></i>         | 0.61                  |          |          |
| <i>R<sup>2</sup> change</i>        | 0.14                  |          | <0.001   |

B (95% CI): raw regression coefficient and 95% confidence interval; β: standardized regression coefficient

All B and β values are for the Step 3 model.

**Table B4. Multiple linear regression of the relationship between sociodemographic and disease variables with signalling question on emotions and stress (n = 1,060)**

|                                    | <b>B (95% CI)</b>      | <b>β</b> | <b>P</b> |
|------------------------------------|------------------------|----------|----------|
| <b>Step 1:</b>                     |                        |          |          |
| Age in years                       | -0.02 (-0.03 to -0.01) | -0.08    | <0.001   |
| Male sex                           | -0.24 (-0.65 to 0.17)  | -0.02    | 0.257    |
| Disease duration                   | -0.01 (-0.03 to 0.00)  | -0.03    | 0.096    |
| Diffuse disease                    | -0.11 (-0.39 to 0.16)  | -0.02    | 0.421    |
| Education in years                 | 0.01 (-0.03 to 0.05)   | 0.01     | 0.597    |
| Married or living as married       | -0.33 (-0.62 to -0.03) | -0.04    | 0.032    |
| Self-efficacy                      | 0.05 (-0.02 to 0.13)   | 0.03     | 0.131    |
| <i>Total R<sup>2</sup></i>         | 0.08                   |          |          |
| <b>Step 2:</b>                     |                        |          |          |
| Mean of remaining signalling items | 0.99 (0.93 to 1.04)    | 0.72     | <0.001   |
| <i>Total R<sup>2</sup></i>         | 0.60                   |          |          |
| <i>R<sup>2</sup> change</i>        | 0.52                   |          | <0.001   |
| <b>Step 3:</b>                     |                        |          |          |
| PROMIS-29 depression               | 0.07 (0.05 to 0.08)    | 0.18     | <0.001   |
| <i>Total R<sup>2</sup></i>         | 0.63                   |          |          |
| <i>R<sup>2</sup> change</i>        | 0.02                   |          | <0.001   |

B (95% CI): raw regression coefficient and 95% confidence interval; β: standardized regression coefficient

All B and β values are for the Step 3 model.

**Table B5. Multiple linear regression of the relationship between sociodemographic and disease variables with signalling question on concerns about body image (n = 1,060)**

|                                    | <b>B (95% CI)</b>      | <b>β</b> | <b>P</b> |
|------------------------------------|------------------------|----------|----------|
| <b>Step 1:</b>                     |                        |          |          |
| Age in years                       | -0.02 (-0.03 to 0.00)  | -0.05    | 0.023    |
| Male sex                           | -0.38 (-0.85 to 0.09)  | -0.03    | 0.109    |
| Disease duration                   | -0.01 (-0.03 to 0.01)  | -0.02    | 0.350    |
| Diffuse disease                    | 0.08 (-0.24 to 0.40)   | 0.01     | 0.627    |
| Education in years                 | -0.06 (-0.10 to -0.01) | -0.06    | 0.009    |
| Married or living as married       | 0.03 (-0.31 to 0.36)   | <0.01    | 0.879    |
| Self-efficacy                      | 0.16 (0.08 to 0.23)    | 0.09     | <0.001   |
| <i>Total R<sup>2</sup></i>         | 0.07                   |          |          |
| <b>Step 2:</b>                     |                        |          |          |
| Mean of remaining signalling items | 0.91 (0.85 to 0.97)    | 0.64     | <0.001   |
| <i>Total R<sup>2</sup></i>         | 0.49                   |          |          |
| <i>R<sup>2</sup> change</i>        | 0.43                   |          | <0.001   |
| <b>Step 3:</b>                     |                        |          |          |
| SAAS score                         | 0.08 (0.06 to 0.09)    | 0.28     | <0.001   |
| <i>Total R<sup>2</sup></i>         | 0.55                   |          |          |
| <i>R<sup>2</sup> change</i>        | 0.06                   |          | <0.001   |

B (95% CI): raw regression coefficient and 95% confidence interval; β: standardized regression coefficient

All B and β values are for the Step 3 model.

**Table B6. Multiple linear regression of the relationship between sociodemographic and disease variables with signalling question on pain (n = 1,060)**

|                                    | <b>B (95% CI)</b>      | <b>β</b> | <b>P</b> |
|------------------------------------|------------------------|----------|----------|
| <b>Step 1:</b>                     |                        |          |          |
| Age in years                       | 0.00 (-0.01 to 0.01)   | 0.01     | 0.696    |
| Male sex                           | 0.42 (0.04 to 0.81)    | 0.04     | 0.032    |
| Disease duration                   | 0.01 (-0.01 to 0.02)   | 0.01     | 0.467    |
| Diffuse disease                    | -0.17 (-0.44 to 0.09)  | -0.03    | 0.193    |
| Education in years                 | -0.05 (-0.09 to -0.02) | -0.05    | 0.005    |
| Married or living as married       | 0.11 (-0.17 to 0.39)   | 0.02     | 0.426    |
| Self-efficacy                      | 0.07 (0.00 to 0.14)    | 0.04     | 0.047    |
| <i>Total R<sup>2</sup></i>         |                        |          |          |
| <b>Step 2:</b>                     |                        |          |          |
| Mean of remaining signalling items | 0.86 (0.81 to 0.91)    | 0.67     | <0.001   |
| <i>Total R<sup>2</sup></i>         |                        |          |          |
|                                    | 0.07                   |          |          |
| <i>R<sup>2</sup> change</i>        |                        |          |          |
|                                    | 0.57                   |          | <0.001   |
| <b>Step 3:</b>                     |                        |          |          |
| PROMIS-29 Pain                     | 0.12 (0.10 to 0.13)    | 0.32     | <0.001   |
| <i>Total R<sup>2</sup></i>         |                        |          |          |
|                                    | 0.64                   |          |          |
| <i>R<sup>2</sup> change</i>        |                        |          |          |
|                                    | 0.07                   |          | <0.001   |

B (95% CI): raw regression coefficient and 95% confidence interval; β: standardized regression coefficient

All B and β values are for the Step 3 model.

**Table B7. Multiple linear regression of the relationship between sociodemographic and disease variables with signalling question on self-management (n = 1,060)**

|                                    | <b>B (95% CI)</b>     | <b>β</b> | <b>P</b> |
|------------------------------------|-----------------------|----------|----------|
| <b>Step 1:</b>                     |                       |          |          |
| Age in years                       | 0.01 (0.00 to 0.02)   | 0.03     | 0.176    |
| Male sex                           | 0.04 (-0.34 to 0.41)  | <0.01    | 0.843    |
| Disease duration                   | 0.00 (-0.02 to 0.01)  | -0.01    | 0.775    |
| Diffuse disease                    | 0.12 (-0.13 to 0.38)  | 0.02     | 0.335    |
| Education in years                 | -0.01 (-0.05 to 0.02) | -0.01    | 0.466    |
| Married or living as married       | 0.10 (-0.17 to 0.37)  | 0.01     | 0.453    |
| Self-efficacy                      | -0.04 (-0.10 to 0.01) | -0.03    | 0.124    |
| <i>Total R<sup>2</sup></i>         | 0.04                  |          |          |
| <b>Step 2:</b>                     |                       |          |          |
| Mean of remaining signalling items | 1.01 (0.96 to 1.06)   | 0.80     | <0.001   |
| <i>Total R<sup>2</sup></i>         | 0.64                  |          |          |
| <i>R<sup>2</sup> change</i>        | 0.60                  |          | <0.001   |

B (95% CI): raw regression coefficient and 95% confidence interval; β: standardized regression coefficient

All B and β values are for the Step 3 model.



**Table B8. Multiple linear regression of the relationship between sociodemographic and disease variables with signalling question on nutrition/diet (n = 1,060)**

|                                    | <b>B (95% CI)</b>      | <b>β</b> | <b>P</b> |
|------------------------------------|------------------------|----------|----------|
| <b>Step 1:</b>                     |                        |          |          |
| Age in years                       | 0.00 (-0.01 to 0.01)   | <-0.01   | 0.949    |
| Male sex                           | -0.53 (-0.94 to -0.11) | -0.05    | 0.014    |
| Disease duration                   | -0.01 (-0.02 to 0.01)  | -0.02    | 0.356    |
| Diffuse disease                    | -0.07 (-0.35 to 0.21)  | -0.01    | 0.621    |
| Education in years                 | 0.05 (0.01 to 0.09)    | 0.06     | 0.011    |
| Married or living as married       | -0.08 (-0.38 to 0.22)  | -0.01    | 0.613    |
| Self-efficacy                      | 0.12 (0.06 to 0.19)    | 0.09     | <0.001   |
| <i>Total R<sup>2</sup></i>         | 0.03                   |          |          |
| <b>Step 2:</b>                     |                        |          |          |
| Mean of remaining signalling items | 0.84 (0.79 to 0.89)    | 0.71     | <0.001   |
| <i>Total R<sup>2</sup></i>         | 0.51                   |          |          |
| <i>R<sup>2</sup> change</i>        | 0.48                   |          | <0.001   |
| <b>Step 3:</b>                     |                        |          |          |
| Interference of GI symptoms        | 0.07 (0.02 to 0.12)    | 0.07     | 0.004    |
| <i>Total R<sup>2</sup></i>         | 0.51                   |          |          |
| <i>R<sup>2</sup> change</i>        | <0.01                  |          | <0.001   |

B (95% CI): raw regression coefficient and 95% confidence interval; β: standardized regression coefficient

All B and β values are for the Step 3 model.

**Table B9. Multiple linear regression of the relationship between sociodemographic and disease variables with signalling question on exercise (n = 1,060)**

|                                    | <b>B (95% CI)</b>     | <b>β</b> | <b>P</b> |
|------------------------------------|-----------------------|----------|----------|
| <b>Step 1:</b>                     |                       |          |          |
| Age in years                       | 0.00 (-0.01 to 0.01)  | 0.01     | 0.725    |
| Male sex                           | -0.21 (-0.62 to 0.20) | -0.02    | 0.313    |
| Disease duration                   | 0.00 (-0.02 to 0.02)  | <-0.01   | 0.981    |
| Diffuse disease                    | 0.15 (-0.12 to 0.43)  | 0.03     | 0.273    |
| Education in years                 | 0.06 (0.02 to 0.09)   | 0.07     | 0.003    |
| Married or living as married       | -0.06 (-0.35 to 0.23) | -0.01    | 0.689    |
| Self-efficacy                      | 0.21 (0.14 to 0.27)   | 0.16     | <0.001   |
| <i>Total R<sup>2</sup></i>         | 0.02                  |          |          |
| <b>Step 2:</b>                     |                       |          |          |
| Mean of remaining signalling items | 0.74 (0.69 to 0.79)   | 0.70     | <0.001   |
| <i>Total R<sup>2</sup></i>         | 0.46                  |          |          |
| <i>R<sup>2</sup> change</i>        | 0.44                  |          | <0.001   |
| <b>Step 3:</b>                     |                       |          |          |
| Activity level                     | -0.10 (-0.24 to 0.03) | -0.04    | 0.130    |
| <i>Total R<sup>2</sup></i>         | 0.46                  |          |          |
| <i>R<sup>2</sup> change</i>        | <0.01                 |          | 0.13     |

B (95% CI): raw regression coefficient and 95% confidence interval; β: standardized regression coefficient

All B and β values are for the Step 3 model.
